# Supplementary material for: The origins of money: Calculation of similarity indexes demonstrates the earliest development of commodity money in prehistoric Central Europe
Source: PLoS One. 2021 Jan 20;16(1):e0240462. doi: 10.1371/journal.pone.0240462 (PMC7816976; doi:10.1371/journal.pone.0240462)
Supplement: S2 Appendix — (XLSX) [file pone.0240462.s002.xlsx]

## Sheet: Rings and ribs
Location	Country	Zone	Date	Weight (g)	Type	Museum	Source
Alzgern	Germany	1	EBA	145.2	Rib	Private Property	Lenerz- de Wilde documentation; Möslein 2008
Alzgern	Germany	1	EBA	92.4	Rib	Private Property	Lenerz- de Wilde documentation; Möslein 2008
Alzgern	Germany	1	EBA	158.7	Rib	Private Property	Lenerz- de Wilde documentation; Möslein 2008
Alzgern	Germany	1	EBA	148.4	Rib	Private Property	Lenerz- de Wilde documentation; Möslein 2008
Alzgern	Germany	1	EBA	155.5	Rib	Private Property	Lenerz- de Wilde documentation; Möslein 2008
Alzgern	Germany	1	EBA	143.8	Rib	Private Property	Lenerz- de Wilde documentation; Möslein 2008
Alzgern	Germany	1	EBA	144.2	Rib	Private Property	Lenerz- de Wilde documentation; Möslein 2008
Alzgern	Germany	1	EBA	167	Rib	Private Property	Lenerz- de Wilde documentation; Möslein 2008
Alzgern	Germany	1	EBA	136.4	Rib	Private Property	Lenerz- de Wilde documentation; Möslein 2008
Alzgern	Germany	1	EBA	142.6	Rib	Private Property	Lenerz- de Wilde documentation; Möslein 2008
Alzgern	Germany	1	EBA	147.7	Rib	Private Property	Lenerz- de Wilde documentation; Möslein 2008
Alzgern	Germany	1	EBA	124.7	Rib	Private Property	Lenerz- de Wilde documentation; Möslein 2008
Alzgern	Germany	1	EBA	107.1	Rib	Private Property	Lenerz- de Wilde documentation; Möslein 2008
Alzgern	Germany	1	EBA	135.2	Rib	Private Property	Lenerz- de Wilde documentation; Möslein 2008
Alzgern	Germany	1	EBA	145.5	Rib	Private Property	Lenerz- de Wilde documentation; Möslein 2008
Alzgern	Germany	1	EBA	141.5	Rib	Private Property	Lenerz- de Wilde documentation; Möslein 2008
Alzgern	Germany	1	EBA	138.8	Rib	Private Property	Lenerz- de Wilde documentation; Möslein 2008
Alzgern	Germany	1	EBA	112.2	Rib	Private Property	Lenerz- de Wilde documentation; Möslein 2008
Alzgern	Germany	1	EBA	116.2	Rib	Private Property	Lenerz- de Wilde documentation; Möslein 2008
Alzgern	Germany	1	EBA	130.4	Rib	Private Property	Lenerz- de Wilde documentation; Möslein 2008
Alzgern	Germany	1	EBA	119.6	Rib	Private Property	Lenerz- de Wilde documentation; Möslein 2008
Alzgern	Germany	1	EBA	136.3	Rib	Private Property	Lenerz- de Wilde documentation; Möslein 2008
Alzgern	Germany	1	EBA	150.8	Rib	Private Property	Lenerz- de Wilde documentation; Möslein 2008
Alzgern	Germany	1	EBA	145.2	Rib	Private Property	Lenerz- de Wilde documentation; Möslein 2008
Alzgern	Germany	1	EBA	149.2	Rib	Private Property	Lenerz- de Wilde documentation; Möslein 2008
Alzgern	Germany	1	EBA	153.7	Rib	Private Property	Lenerz- de Wilde documentation; Möslein 2008
Alzgern	Germany	1	EBA	145	Rib	Private Property	Lenerz- de Wilde documentation; Möslein 2008
Alzgern	Germany	1	EBA	156.9	Rib	Private Property	Lenerz- de Wilde documentation; Möslein 2008
Amselfing	Germany	1	EBA	147	Ring	Straubing	Lenerz- de Wilde documentation
Amselfing	Germany	1	EBA	140	Ring	Straubing	Lenerz- de Wilde documentation
Amselfing	Germany	1	EBA	143	Ring	Straubing	Lenerz- de Wilde documentation
Amselfing	Germany	1	EBA	139	Ring	Straubing	Lenerz- de Wilde documentation
Amselfing	Germany	1	EBA	125	Ring	Straubing	Lenerz- de Wilde documentation
Amselfing	Germany	1	EBA	146	Ring	Straubing	Lenerz- de Wilde documentation
Amselfing	Germany	1	EBA	146	Ring	Straubing	Lenerz- de Wilde documentation
Amselfing	Germany	1	EBA	140	Ring	Straubing	Lenerz- de Wilde documentation
Amselfing	Germany	1	EBA	120	Ring	Straubing	Lenerz- de Wilde documentation
Amselfing	Germany	1	EBA	143	Ring	Straubing	Lenerz- de Wilde documentation
Amselfing	Germany	1	EBA	129	Ring	Straubing	Lenerz- de Wilde documentation
Amselfing	Germany	1	EBA	150	Ring	Straubing	Lenerz- de Wilde documentation
Amselfing	Germany	1	EBA	152	Ring	Straubing	Lenerz- de Wilde documentation
Amselfing	Germany	1	EBA	129	Ring	Straubing	Lenerz- de Wilde documentation
Amselfing	Germany	1	EBA	135	Ring	Straubing	Lenerz- de Wilde documentation
Amselfing	Germany	1	EBA	135	Ring	Straubing	Lenerz- de Wilde documentation
Amselfing	Germany	1	EBA	108	Ring	Straubing	Lenerz- de Wilde documentation
Amselfing	Germany	1	EBA	132	Ring	Straubing	Lenerz- de Wilde documentation
Amselfing	Germany	1	EBA	141	Ring	Straubing	Lenerz- de Wilde documentation
Andechs-Erling	Germany	1	EBA	171	Ring	Munich	Lenerz- de Wilde 2002
Andechs-Erling	Germany	1	EBA	181	Ring	Munich	Lenerz- de Wilde 2002
Andechs-Erling	Germany	1	EBA	190	Ring	Munich	Lenerz- de Wilde 2002
Andechs-Erling	Germany	1	EBA	188	Ring	Munich	Lenerz- de Wilde 2002
Andechs-Erling	Germany	1	EBA	173	Ring	Munich	Lenerz- de Wilde 2002
Aschering	Germany	1	EBA	95	Ring	Munich	Lenerz- de Wilde documentation
Aschering	Germany	1	EBA	170	Ring	Munich	Lenerz- de Wilde documentation
Aschering	Germany	1	EBA	85	Ring	Munich	Lenerz- de Wilde documentation
Aschering	Germany	1	EBA	118	Ring	Munich	Lenerz- de Wilde documentation
Aschering	Germany	1	EBA	118	Ring	Munich	Lenerz- de Wilde documentation
Aschering	Germany	1	EBA	151	Ring	Munich	Lenerz- de Wilde documentation
Aschering	Germany	1	EBA	155	Ring	Munich	Lenerz- de Wilde documentation
Aschering	Germany	1	EBA	138	Ring	Munich	Lenerz- de Wilde documentation
Aschering	Germany	1	EBA	144	Ring	Munich	Lenerz- de Wilde documentation
Aschering	Germany	1	EBA	156	Ring	Munich	Lenerz- de Wilde documentation
Aschering	Germany	1	EBA	125	Ring	Munich	Lenerz- de Wilde documentation
Aschering	Germany	1	EBA	141	Ring	Munich	Lenerz- de Wilde documentation
Aschering	Germany	1	EBA	103	Ring	Munich	Lenerz- de Wilde documentation
Aschering	Germany	1	EBA	156	Ring	Munich	Lenerz- de Wilde documentation
Aschering	Germany	1	EBA	125	Ring	Munich	Lenerz- de Wilde documentation
Aschering	Germany	1	EBA	110	Ring	Munich	Lenerz- de Wilde documentation
Aschering	Germany	1	EBA	144	Ring	Munich	Lenerz- de Wilde documentation
Aschering	Germany	1	EBA	78	Ring	Munich	Lenerz- de Wilde documentation
Aschering	Germany	1	EBA	138	Ring	Munich	Lenerz- de Wilde documentation
Aschering	Germany	1	EBA	103	Ring	Munich	Lenerz- de Wilde documentation
Aschering	Germany	1	EBA	133	Ring	Munich	Lenerz- de Wilde documentation
Aschering	Germany	1	EBA	147	Ring	Munich	Lenerz- de Wilde documentation
Aschering	Germany	1	EBA	145	Ring	Munich	Lenerz- de Wilde documentation
Aschering	Germany	1	EBA	134	Ring	Munich	Lenerz- de Wilde documentation
Aschering	Germany	1	EBA	108	Ring	Munich	Lenerz- de Wilde documentation
Aschering	Germany	1	EBA	160	Ring	Munich	Lenerz- de Wilde documentation
Aschering	Germany	1	EBA	127	Ring	Munich	Lenerz- de Wilde documentation
Aschering	Germany	1	EBA	114	Ring	Munich	Lenerz- de Wilde documentation
Aschering	Germany	1	EBA	108	Ring	Munich	Lenerz- de Wilde documentation
Aschering	Germany	1	EBA	88	Ring	Munich	Lenerz- de Wilde documentation
Aschering	Germany	1	EBA	142	Ring	Munich	Lenerz- de Wilde documentation
Aschering	Germany	1	EBA	157	Ring	Munich	Lenerz- de Wilde documentation
Aschering	Germany	1	EBA	143	Ring	Munich	Lenerz- de Wilde documentation
Aschering	Germany	1	EBA	106	Ring	Munich	Lenerz- de Wilde documentation
Aschering	Germany	1	EBA	118	Ring	Munich	Lenerz- de Wilde documentation
Aschering	Germany	1	EBA	87	Ring	Munich	Lenerz- de Wilde documentation
Aschering	Germany	1	EBA	104	Ring	Munich	Lenerz- de Wilde documentation
Aschering	Germany	1	EBA	143	Ring	Munich	Lenerz- de Wilde documentation
Aschering	Germany	1	EBA	126	Ring	Munich	Lenerz- de Wilde documentation
Aschering	Germany	1	EBA	124	Ring	Munich	Lenerz- de Wilde documentation
Aschering	Germany	1	EBA	106	Ring	Munich	Lenerz- de Wilde documentation
Aschering	Germany	1	EBA	127	Ring	Munich	Lenerz- de Wilde documentation
Aschering	Germany	1	EBA	154	Ring	Munich	Lenerz- de Wilde documentation
Aschering	Germany	1	EBA	109	Ring	Munich	Lenerz- de Wilde documentation
Aschering	Germany	1	EBA	123	Ring	Munich	Lenerz- de Wilde documentation
Aschering	Germany	1	EBA	125	Ring	Munich	Lenerz- de Wilde documentation
Aschering	Germany	1	EBA	98	Ring	Munich	Lenerz- de Wilde documentation
Aschering	Germany	1	EBA	120	Ring	Munich	Lenerz- de Wilde documentation
Aschering	Germany	1	EBA	131	Ring	Munich	Lenerz- de Wilde documentation
Aschering	Germany	1	EBA	94	Ring	Munich	Lenerz- de Wilde documentation
Aschering	Germany	1	EBA	157	Ring	Munich	Lenerz- de Wilde documentation
Aschering	Germany	1	EBA	162	Ring	Munich	Lenerz- de Wilde documentation
Aschering	Germany	1	EBA	118	Ring	Munich	Lenerz- de Wilde documentation
Aschering	Germany	1	EBA	125	Ring	Munich	Lenerz- de Wilde documentation
Aschering	Germany	1	EBA	112	Ring	Munich	Lenerz- de Wilde documentation
Aschering	Germany	1	EBA	172	Ring	Munich	Lenerz- de Wilde documentation
Aschering	Germany	1	EBA	105	Ring	Munich	Lenerz- de Wilde documentation
Aschering	Germany	1	EBA	130	Ring	Munich	Lenerz- de Wilde documentation
Aschering	Germany	1	EBA	155	Ring	Munich	Lenerz- de Wilde documentation
Aschering	Germany	1	EBA	116	Ring	Munich	Lenerz- de Wilde documentation
Aschering	Germany	1	EBA	152	Ring	Munich	Lenerz- de Wilde documentation
Aschering	Germany	1	EBA	130	Ring	Munich	Lenerz- de Wilde documentation
Aschering	Germany	1	EBA	118	Ring	Munich	Lenerz- de Wilde documentation
Aschering	Germany	1	EBA	127	Ring	Munich	Lenerz- de Wilde documentation
Asparn an der Zaya	Austria	1	EBA	202	Ring	Vienna	Lenerz- de Wilde documentation
Asparn an der Zaya	Austria	1	EBA	213	Ring	Vienna	Lenerz- de Wilde documentation
Asparn an der Zaya	Austria	1	EBA	215	Ring	Vienna	Lenerz- de Wilde documentation
Asparn an der Zaya	Austria	1	EBA	187	Ring	Vienna	Lenerz- de Wilde documentation
Asparn an der Zaya	Austria	1	EBA	200	Ring	Vienna	Lenerz- de Wilde documentation
Asparn an der Zaya	Austria	1	EBA	197	Ring	Vienna	Lenerz- de Wilde documentation
Asparn an der Zaya	Austria	1	EBA	194	Ring	Vienna	Lenerz- de Wilde documentation
Asparn an der Zaya	Austria	1	EBA	207	Ring	Vienna	Lenerz- de Wilde documentation
Asparn an der Zaya	Austria	1	EBA	218	Ring	Vienna	Lenerz- de Wilde documentation
Asparn an der Zaya	Austria	1	EBA	202	Ring	Vienna	Lenerz- de Wilde documentation
Asparn an der Zaya	Austria	1	EBA	178	Ring	Vienna	Lenerz- de Wilde documentation
Asparn an der Zaya	Austria	1	EBA	200	Ring	Vienna	Lenerz- de Wilde documentation
Asparn an der Zaya	Austria	1	EBA	195	Ring	Vienna	Lenerz- de Wilde documentation
Asparn an der Zaya	Austria	1	EBA	191	Ring	Vienna	Lenerz- de Wilde documentation
Asparn an der Zaya	Austria	1	EBA	207	Ring	Vienna	Lenerz- de Wilde documentation
Asparn an der Zaya	Austria	1	EBA	183	Ring	Vienna	Lenerz- de Wilde documentation
Asparn an der Zaya	Austria	1	EBA	222	Ring	Vienna	Lenerz- de Wilde documentation
Asparn an der Zaya	Austria	1	EBA	197	Ring	Vienna	Lenerz- de Wilde documentation
Asparn an der Zaya	Austria	1	EBA	190	Ring	Vienna	Lenerz- de Wilde documentation
Asparn an der Zaya	Austria	1	EBA	187	Ring	Vienna	Lenerz- de Wilde documentation
Asparn an der Zaya	Austria	1	EBA	202	Ring	Vienna	Lenerz- de Wilde documentation
Asparn an der Zaya	Austria	1	EBA	217	Ring	Vienna	Lenerz- de Wilde documentation
Asparn an der Zaya	Austria	1	EBA	204	Ring	Vienna	Lenerz- de Wilde documentation
Asparn an der Zaya	Austria	1	EBA	172	Ring	Vienna	Lenerz- de Wilde documentation
Asparn an der Zaya	Austria	1	EBA	193	Ring	Vienna	Lenerz- de Wilde documentation
Asparn an der Zaya	Austria	1	EBA	165	Ring	Vienna	Lenerz- de Wilde documentation
Asparn an der Zaya	Austria	1	EBA	185	Ring	Vienna	Lenerz- de Wilde documentation
Asparn an der Zaya	Austria	1	EBA	201	Ring	Vienna	Lenerz- de Wilde documentation
Asparn an der Zaya	Austria	1	EBA	209	Ring	Vienna	Lenerz- de Wilde documentation
Asparn an der Zaya	Austria	1	EBA	302	Ring	Vienna	Lenerz- de Wilde documentation
Aspersdorf	Austria	1	EBA	205	Ring	Hollabrunn	Lenerz- de Wilde documentation
Aspersdorf	Austria	1	EBA	210	Ring	Hollabrunn	Lenerz- de Wilde documentation
Aspersdorf	Austria	1	EBA	182	Ring	Hollabrunn	Lenerz- de Wilde documentation
Aspersdorf	Austria	1	EBA	201	Ring	Hollabrunn	Lenerz- de Wilde documentation
Aspersdorf	Austria	1	EBA	207	Ring	Hollabrunn	Lenerz- de Wilde documentation
Aspersdorf	Austria	1	EBA	205	Ring	Hollabrunn	Lenerz- de Wilde documentation
Aspersdorf	Austria	1	EBA	217	Ring	Hollabrunn	Lenerz- de Wilde documentation
Aspersdorf	Austria	1	EBA	219	Ring	Hollabrunn	Lenerz- de Wilde documentation
Aspersdorf	Austria	1	EBA	208	Ring	Hollabrunn	Lenerz- de Wilde documentation
Aspersdorf	Austria	1	EBA	207	Ring	Hollabrunn	Lenerz- de Wilde documentation
Aspersdorf	Austria	1	EBA	201	Ring	Hollabrunn	Lenerz- de Wilde documentation
Aspersdorf	Austria	1	EBA	204	Ring	Hollabrunn	Lenerz- de Wilde documentation
Aspersdorf	Austria	1	EBA	217	Ring	Hollabrunn	Lenerz- de Wilde documentation
Aspersdorf	Austria	1	EBA	222	Ring	Hollabrunn	Lenerz- de Wilde documentation
Baiern-Piusheim	Germany	1	EBA	60	Rib	Munich	Menke 1978/1979
Baiern-Piusheim	Germany	1	EBA	64.5	Rib	Munich	Menke 1978/1979
Baiern-Piusheim	Germany	1	EBA	66	Rib	Munich	Menke 1978/1979
Baiern-Piusheim	Germany	1	EBA	68	Rib	Munich	Menke 1978/1979
Baiern-Piusheim	Germany	1	EBA	58	Rib	Munich	Menke 1978/1979
Baiern-Piusheim	Germany	1	EBA	90	Rib	Munich	Menke 1978/1979
Baiern-Piusheim	Germany	1	EBA	71	Rib	Munich	Menke 1978/1979
Baiern-Piusheim	Germany	1	EBA	69	Rib	Munich	Menke 1978/1979
Bedřichovice	Czech Republic	1	EBA	175	Ring	Brno	Lenerz- de Wilde documentation
Bedřichovice	Czech Republic	1	EBA	186	Ring	Brno	Lenerz- de Wilde documentation
Bedřichovice	Czech Republic	1	EBA	198	Ring	Brno	Lenerz- de Wilde documentation
Bedřichovice	Czech Republic	1	EBA	207	Ring	Brno	Lenerz- de Wilde documentation
Bedřichovice	Czech Republic	1	EBA	190	Ring	Brno	Lenerz- de Wilde documentation
Bedřichovice	Czech Republic	1	EBA	200	Ring	Brno	Lenerz- de Wilde documentation
Bedřichovice	Czech Republic	1	EBA	188	Ring	Brno	Lenerz- de Wilde documentation
Bedřichovice	Czech Republic	1	EBA	202	Ring	Brno	Lenerz- de Wilde documentation
Bedřichovice	Czech Republic	1	EBA	185	Ring	Brno	Lenerz- de Wilde documentation
Bedřichovice	Czech Republic	1	EBA	204	Ring	Brno	Lenerz- de Wilde documentation
Bedřichovice	Czech Republic	1	EBA	207	Ring	Brno	Lenerz- de Wilde documentation
Bedřichovice	Czech Republic	1	EBA	200	Ring	Brno	Lenerz- de Wilde documentation
Bedřichovice	Czech Republic	1	EBA	198	Ring	Brno	Lenerz- de Wilde documentation
Bedřichovice	Czech Republic	1	EBA	203	Ring	Brno	Lenerz- de Wilde documentation
Bedřichovice	Czech Republic	1	EBA	195	Ring	Brno	Lenerz- de Wilde documentation
Bedřichovice	Czech Republic	1	EBA	197	Ring	Brno	Lenerz- de Wilde documentation
Bedřichovice	Czech Republic	1	EBA	197	Ring	Brno	Lenerz- de Wilde documentation
Bedřichovice	Czech Republic	1	EBA	188	Ring	Brno	Lenerz- de Wilde documentation
Bedřichovice	Czech Republic	1	EBA	194	Ring	Brno	Lenerz- de Wilde documentation
Bedřichovice	Czech Republic	1	EBA	184	Ring	Brno	Lenerz- de Wilde documentation
Bedřichovice	Czech Republic	1	EBA	191	Ring	Brno	Lenerz- de Wilde documentation
Bedřichovice	Czech Republic	1	EBA	187	Ring	Brno	Lenerz- de Wilde documentation
Bedřichovice	Czech Republic	1	EBA	196	Ring	Brno	Lenerz- de Wilde documentation
Bedřichovice	Czech Republic	1	EBA	197	Ring	Brno	Lenerz- de Wilde documentation
Bedřichovice	Czech Republic	1	EBA	183	Ring	Brno	Lenerz- de Wilde documentation
Bedřichovice	Czech Republic	1	EBA	185	Ring	Brno	Lenerz- de Wilde documentation
Bedřichovice	Czech Republic	1	EBA	191	Ring	Brno	Lenerz- de Wilde documentation
Bedřichovice	Czech Republic	1	EBA	193	Ring	Brno	Lenerz- de Wilde documentation
Bedřichovice	Czech Republic	1	EBA	205	Ring	Brno	Lenerz- de Wilde documentation
Bedřichovice	Czech Republic	1	EBA	194	Ring	Brno	Lenerz- de Wilde documentation
Bedřichovice	Czech Republic	1	EBA	182	Ring	Brno	Lenerz- de Wilde documentation
Bedřichovice	Czech Republic	1	EBA	189	Ring	Brno	Lenerz- de Wilde documentation
Bedřichovice	Czech Republic	1	EBA	216	Ring	Brno	Lenerz- de Wilde documentation
Bedřichovice	Czech Republic	1	EBA	194	Ring	Brno	Lenerz- de Wilde documentation
Bedřichovice	Czech Republic	1	EBA	212	Ring	Brno	Lenerz- de Wilde documentation
Bergheim-Viehausen	Austria	1	EBA	151	Ring	Salzburg	Lenerz- de Wilde documentation
Bergheim-Viehausen	Austria	1	EBA	157	Ring	Salzburg	Lenerz- de Wilde documentation
Bergheim-Viehausen	Austria	1	EBA	189	Ring	Salzburg	Lenerz- de Wilde documentation
Bergheim-Viehausen	Austria	1	EBA	161	Ring	Salzburg	Lenerz- de Wilde documentation
Bergheim-Viehausen	Austria	1	EBA	187	Ring	Salzburg	Lenerz- de Wilde documentation
Bergheim-Viehausen	Austria	1	EBA	182	Ring	Salzburg	Lenerz- de Wilde documentation
Bergheim-Viehausen	Austria	1	EBA	158	Ring	Salzburg	Lenerz- de Wilde documentation
Bergheim-Viehausen	Austria	1	EBA	193	Ring	Salzburg	Lenerz- de Wilde documentation
Bergheim-Viehausen	Austria	1	EBA	174	Ring	Salzburg	Lenerz- de Wilde documentation
Bergheim-Viehausen	Austria	1	EBA	199	Ring	Salzburg	Lenerz- de Wilde documentation
Bergheim-Viehausen	Austria	1	EBA	182	Ring	Salzburg	Lenerz- de Wilde documentation
Bermatingen	Germany	1	EBA	77	Rib	Konstanz	Lenerz- de Wilde documentation
Bermatingen	Germany	1	EBA	66	Rib	Konstanz	Lenerz- de Wilde documentation
Bermatingen	Germany	1	EBA	105	Rib	Konstanz	Lenerz- de Wilde documentation
Bermatingen	Germany	1	EBA	90	Rib	Konstanz	Lenerz- de Wilde documentation
Bermatingen	Germany	1	EBA	64	Rib	Konstanz	Lenerz- de Wilde documentation
Bermatingen	Germany	1	EBA	89	Rib	Konstanz	Lenerz- de Wilde documentation
Bermatingen	Germany	1	EBA	73	Rib	Konstanz	Lenerz- de Wilde documentation
Bermatingen	Germany	1	EBA	63	Rib	Konstanz	Lenerz- de Wilde documentation
Bermatingen	Germany	1	EBA	42	Rib	Konstanz	Lenerz- de Wilde documentation
Bermatingen	Germany	1	EBA	80	Rib	Konstanz	Lenerz- de Wilde documentation
Bermatingen	Germany	1	EBA	100	Rib	Konstanz	Lenerz- de Wilde documentation
Bermatingen	Germany	1	EBA	75	Rib	Konstanz	Lenerz- de Wilde documentation
Bermatingen	Germany	1	EBA	76	Rib	Konstanz	Lenerz- de Wilde documentation
Bermatingen	Germany	1	EBA	68	Rib	Konstanz	Lenerz- de Wilde documentation
Bermatingen	Germany	1	EBA	97	Rib	Konstanz	Lenerz- de Wilde documentation
Bermatingen	Germany	1	EBA	81	Rib	Konstanz	Lenerz- de Wilde documentation
Bermatingen	Germany	1	EBA	63	Rib	Konstanz	Lenerz- de Wilde documentation
Bermatingen	Germany	1	EBA	69	Rib	Konstanz	Lenerz- de Wilde documentation
Bermatingen	Germany	1	EBA	64	Rib	Konstanz	Lenerz- de Wilde documentation
Bermatingen	Germany	1	EBA	76	Rib	Konstanz	Lenerz- de Wilde documentation
Bermatingen	Germany	1	EBA	91	Rib	Konstanz	Lenerz- de Wilde documentation
Bermatingen	Germany	1	EBA	92	Rib	Konstanz	Lenerz- de Wilde documentation
Bermatingen	Germany	1	EBA	93	Rib	Konstanz	Lenerz- de Wilde documentation
Bermatingen	Germany	1	EBA	78	Rib	Konstanz	Lenerz- de Wilde documentation
Bermatingen	Germany	1	EBA	75	Rib	Konstanz	Lenerz- de Wilde documentation
Bermatingen	Germany	1	EBA	90	Rib	Konstanz	Lenerz- de Wilde documentation
Bermatingen	Germany	1	EBA	95	Rib	Konstanz	Lenerz- de Wilde documentation
Bermatingen	Germany	1	EBA	74	Rib	Konstanz	Lenerz- de Wilde documentation
Bermatingen	Germany	1	EBA	105	Rib	Konstanz	Lenerz- de Wilde documentation
Bermatingen	Germany	1	EBA	102	Rib	Konstanz	Lenerz- de Wilde documentation
Bermatingen	Germany	1	EBA	66	Rib	Konstanz	Lenerz- de Wilde documentation
Bermatingen	Germany	1	EBA	82	Rib	Konstanz	Lenerz- de Wilde documentation
Bermatingen	Germany	1	EBA	79	Rib	Konstanz	Lenerz- de Wilde documentation
Bermatingen	Germany	1	EBA	85	Rib	Konstanz	Lenerz- de Wilde documentation
Bermatingen	Germany	1	EBA	90	Rib	Konstanz	Lenerz- de Wilde documentation
Bermatingen	Germany	1	EBA	92	Rib	Konstanz	Lenerz- de Wilde documentation
Bermatingen	Germany	1	EBA	74	Rib	Konstanz	Lenerz- de Wilde documentation
Bermatingen	Germany	1	EBA	79	Rib	Konstanz	Lenerz- de Wilde documentation
Bermatingen	Germany	1	EBA	89	Rib	Konstanz	Lenerz- de Wilde documentation
Bermatingen	Germany	1	EBA	76	Rib	Konstanz	Lenerz- de Wilde documentation
Bermatingen	Germany	1	EBA	87	Rib	Konstanz	Lenerz- de Wilde documentation
Bermatingen	Germany	1	EBA	100	Rib	Konstanz	Lenerz- de Wilde documentation
Bermatingen	Germany	1	EBA	81	Rib	Konstanz	Lenerz- de Wilde documentation
Bermatingen	Germany	1	EBA	95	Rib	Konstanz	Lenerz- de Wilde documentation
Bermatingen	Germany	1	EBA	99	Rib	Konstanz	Lenerz- de Wilde documentation
Bermatingen	Germany	1	EBA	77	Rib	Konstanz	Lenerz- de Wilde documentation
Bermatingen	Germany	1	EBA	85	Rib	Konstanz	Lenerz- de Wilde documentation
Bermatingen	Germany	1	EBA	95	Rib	Konstanz	Lenerz- de Wilde documentation
Bermatingen	Germany	1	EBA	95	Rib	Konstanz	Lenerz- de Wilde documentation
Bermatingen	Germany	1	EBA	78	Rib	Konstanz	Lenerz- de Wilde documentation
Bermatingen	Germany	1	EBA	76	Rib	Konstanz	Lenerz- de Wilde documentation
Bermatingen	Germany	1	EBA	81	Rib	Konstanz	Lenerz- de Wilde documentation
Bermatingen	Germany	1	EBA	123	Rib	Konstanz	Lenerz- de Wilde documentation
Bermatingen	Germany	1	EBA	75	Rib	Konstanz	Lenerz- de Wilde documentation
Bermatingen	Germany	1	EBA	86	Rib	Konstanz	Lenerz- de Wilde documentation
Bermatingen	Germany	1	EBA	87	Rib	Konstanz	Lenerz- de Wilde documentation
Bermatingen	Germany	1	EBA	76	Rib	Konstanz	Lenerz- de Wilde documentation
Bermatingen	Germany	1	EBA	71	Rib	Konstanz	Lenerz- de Wilde documentation
Bermatingen	Germany	1	EBA	88	Rib	Konstanz	Lenerz- de Wilde documentation
Bermatingen	Germany	1	EBA	113	Rib	Konstanz	Lenerz- de Wilde documentation
Bermatingen	Germany	1	EBA	86	Rib	Konstanz	Lenerz- de Wilde documentation
Bermatingen	Germany	1	EBA	75	Rib	Konstanz	Lenerz- de Wilde documentation
Bermatingen	Germany	1	EBA	84	Rib	Konstanz	Lenerz- de Wilde documentation
Bernhaupten	Germany	1	EBA	153	Ring	Munich	Lenerz- de Wilde documentation
Bernhaupten	Germany	1	EBA	195	Ring	Munich	Lenerz- de Wilde documentation
Bernhaupten	Germany	1	EBA	186	Ring	Munich	Lenerz- de Wilde documentation
Bernhaupten	Germany	1	EBA	151	Ring	Munich	Lenerz- de Wilde documentation
Bernhaupten	Germany	1	EBA	181	Ring	Munich	Lenerz- de Wilde documentation
Bernhaupten	Germany	1	EBA	118	Ring	Munich	Lenerz- de Wilde documentation
Bernhaupten	Germany	1	EBA	192	Ring	Munich	Lenerz- de Wilde documentation
Bernhaupten	Germany	1	EBA	181	Ring	Munich	Lenerz- de Wilde documentation
Bernhaupten	Germany	1	EBA	177	Ring	Munich	Lenerz- de Wilde documentation
Bernhaupten	Germany	1	EBA	184	Ring	Munich	Lenerz- de Wilde documentation
Bernhaupten	Germany	1	EBA	187	Ring	Munich	Lenerz- de Wilde documentation
Bernhaupten	Germany	1	EBA	182	Ring	Munich	Lenerz- de Wilde documentation
Bernhaupten	Germany	1	EBA	193	Ring	Munich	Lenerz- de Wilde documentation
Bernhaupten	Germany	1	EBA	205	Ring	Munich	Lenerz- de Wilde documentation
Bernhaupten	Germany	1	EBA	175	Ring	Munich	Lenerz- de Wilde documentation
Bernhaupten	Germany	1	EBA	210	Ring	Munich	Lenerz- de Wilde documentation
Bernhaupten	Germany	1	EBA	153	Ring	Munich	Lenerz- de Wilde documentation
Bernhaupten	Germany	1	EBA	189	Ring	Munich	Lenerz- de Wilde documentation
Bernhaupten	Germany	1	EBA	174	Ring	Munich	Lenerz- de Wilde documentation
Bernhaupten	Germany	1	EBA	199	Ring	Munich	Lenerz- de Wilde documentation
Bernhaupten	Germany	1	EBA	188	Ring	Munich	Lenerz- de Wilde documentation
Bernhaupten	Germany	1	EBA	181	Ring	Munich	Lenerz- de Wilde documentation
Bernhaupten	Germany	1	EBA	202	Ring	Munich	Lenerz- de Wilde documentation
Bernhaupten	Germany	1	EBA	191	Ring	Munich	Lenerz- de Wilde documentation
Bernhaupten	Germany	1	EBA	177	Ring	Munich	Lenerz- de Wilde documentation
Bernhaupten	Germany	1	EBA	196	Ring	Munich	Lenerz- de Wilde documentation
Bernhaupten	Germany	1	EBA	195	Ring	Munich	Lenerz- de Wilde documentation
Bernhaupten	Germany	1	EBA	162	Ring	Munich	Lenerz- de Wilde documentation
Bernhaupten	Germany	1	EBA	189	Ring	Munich	Lenerz- de Wilde documentation
Bernhaupten	Germany	1	EBA	168	Ring	Munich	Lenerz- de Wilde documentation
Bernhaupten	Germany	1	EBA	168	Ring	Munich	Lenerz- de Wilde documentation
Bernhaupten	Germany	1	EBA	218	Ring	Munich	Lenerz- de Wilde documentation
Bernhaupten	Germany	1	EBA	157	Ring	Munich	Lenerz- de Wilde documentation
Bernhaupten	Germany	1	EBA	186	Ring	Munich	Lenerz- de Wilde documentation
Bernhaupten	Germany	1	EBA	137	Ring	Munich	Lenerz- de Wilde documentation
Bernhaupten	Germany	1	EBA	159	Ring	Munich	Lenerz- de Wilde documentation
Bernhaupten	Germany	1	EBA	177	Ring	Munich	Lenerz- de Wilde documentation
Bernhaupten	Germany	1	EBA	149	Ring	Munich	Lenerz- de Wilde documentation
Bernhaupten	Germany	1	EBA	205	Ring	Munich	Lenerz- de Wilde documentation
Bernhaupten	Germany	1	EBA	165	Ring	Munich	Lenerz- de Wilde documentation
Bernhaupten	Germany	1	EBA	204	Ring	Munich	Lenerz- de Wilde documentation
Bernhaupten	Germany	1	EBA	204	Ring	Munich	Lenerz- de Wilde documentation
Bernhaupten	Germany	1	EBA	176	Ring	Munich	Lenerz- de Wilde documentation
Bernhaupten	Germany	1	EBA	206	Ring	Munich	Lenerz- de Wilde documentation
Bernhaupten	Germany	1	EBA	140	Ring	Munich	Lenerz- de Wilde documentation
Bernhaupten	Germany	1	EBA	164	Ring	Munich	Lenerz- de Wilde documentation
Bernhaupten	Germany	1	EBA	213	Ring	Munich	Lenerz- de Wilde documentation
Bernhaupten	Germany	1	EBA	232	Ring	Munich	Lenerz- de Wilde documentation
Bernhaupten	Germany	1	EBA	218	Ring	Munich	Lenerz- de Wilde documentation
Bernhaupten	Germany	1	EBA	158	Ring	Munich	Lenerz- de Wilde documentation
Bernhaupten	Germany	1	EBA	184	Ring	Munich	Lenerz- de Wilde documentation
Bernhaupten	Germany	1	EBA	154	Ring	Munich	Lenerz- de Wilde documentation
Bernhaupten	Germany	1	EBA	180	Ring	Munich	Lenerz- de Wilde documentation
Bernhaupten	Germany	1	EBA	151	Ring	Munich	Lenerz- de Wilde documentation
Bernhaupten	Germany	1	EBA	210	Ring	Munich	Lenerz- de Wilde documentation
Bernhaupten	Germany	1	EBA	182	Ring	Munich	Lenerz- de Wilde documentation
Bernhaupten	Germany	1	EBA	203	Ring	Munich	Lenerz- de Wilde documentation
Bernhaupten	Germany	1	EBA	206	Ring	Munich	Lenerz- de Wilde documentation
Bernhaupten	Germany	1	EBA	180	Ring	Munich	Lenerz- de Wilde documentation
Bernhaupten	Germany	1	EBA	145	Ring	Munich	Lenerz- de Wilde documentation
Bernhaupten	Germany	1	EBA	184	Ring	Munich	Lenerz- de Wilde documentation
Bernhaupten	Germany	1	EBA	201	Ring	Munich	Lenerz- de Wilde documentation
Bernhaupten	Germany	1	EBA	183	Ring	Munich	Lenerz- de Wilde documentation
Bernhaupten	Germany	1	EBA	204	Ring	Munich	Lenerz- de Wilde documentation
Bernhaupten	Germany	1	EBA	205	Ring	Munich	Lenerz- de Wilde documentation
Bernhaupten	Germany	1	EBA	192	Ring	Munich	Lenerz- de Wilde documentation
Bernhaupten	Germany	1	EBA	177	Ring	Munich	Lenerz- de Wilde documentation
Bernhaupten	Germany	1	EBA	170	Ring	Munich	Lenerz- de Wilde documentation
Blažim	Czech Republic	1	EBA	174	Ring	České Budějovice	Moucha 2005
Blažim	Czech Republic	1	EBA	133	Ring	České Budějovice	Moucha 2005
Blažim	Czech Republic	1	EBA	164	Ring	České Budějovice	Moucha 2005
Blažim	Czech Republic	1	EBA	138	Ring	České Budějovice	Moucha 2005
Blažim	Czech Republic	1	EBA	136	Ring	České Budějovice	Moucha 2005
Blažim	Czech Republic	1	EBA	212	Ring	České Budějovice	Moucha 2005
Blučina	Czech Republic	1	EBA	196	Ring	Brno	Lenerz- de Wilde documentation
Blučina	Czech Republic	1	EBA	199	Ring	Brno	Lenerz- de Wilde documentation
Blučina	Czech Republic	1	EBA	204	Ring	Brno	Lenerz- de Wilde documentation
Blučina	Czech Republic	1	EBA	201	Ring	Brno	Lenerz- de Wilde documentation
Blučina	Czech Republic	1	EBA	200	Ring	Brno	Lenerz- de Wilde documentation
Blučina	Czech Republic	1	EBA	223	Ring	Brno	Lenerz- de Wilde documentation
Blučina	Czech Republic	1	EBA	204	Ring	Brno	Lenerz- de Wilde documentation
Blučina	Czech Republic	1	EBA	199	Ring	Brno	Lenerz- de Wilde documentation
Blučina	Czech Republic	1	EBA	194	Ring	Brno	Lenerz- de Wilde documentation
Blučina	Czech Republic	1	EBA	214	Ring	Brno	Lenerz- de Wilde documentation
Blučina	Czech Republic	1	EBA	202	Ring	Brno	Lenerz- de Wilde documentation
Blučina	Czech Republic	1	EBA	192	Ring	Brno	Lenerz- de Wilde documentation
Blučina	Czech Republic	1	EBA	204	Ring	Brno	Lenerz- de Wilde documentation
Blučina	Czech Republic	1	EBA	203	Ring	Brno	Lenerz- de Wilde documentation
Blučina	Czech Republic	1	EBA	199	Ring	Brno	Lenerz- de Wilde documentation
Blučina	Czech Republic	1	EBA	204	Ring	Brno	Lenerz- de Wilde documentation
Blučina	Czech Republic	1	EBA	201	Ring	Brno	Lenerz- de Wilde documentation
Blučina	Czech Republic	1	EBA	177	Ring	Brno	Lenerz- de Wilde documentation
Blučina	Czech Republic	1	EBA	184	Ring	Brno	Lenerz- de Wilde documentation
Blučina	Czech Republic	1	EBA	172	Ring	Brno	Lenerz- de Wilde documentation
Blučina	Czech Republic	1	EBA	201	Ring	Brno	Lenerz- de Wilde documentation
Blučina	Czech Republic	1	EBA	200	Ring	Brno	Lenerz- de Wilde documentation
Blučina	Czech Republic	1	EBA	198	Ring	Brno	Lenerz- de Wilde documentation
Blučina	Czech Republic	1	EBA	192	Ring	Brno	Lenerz- de Wilde documentation
Blučina	Czech Republic	1	EBA	202	Ring	Brno	Lenerz- de Wilde documentation
Blučina	Czech Republic	1	EBA	204	Ring	Brno	Lenerz- de Wilde documentation
Blučina	Czech Republic	1	EBA	205	Ring	Brno	Lenerz- de Wilde documentation
Blučina	Czech Republic	1	EBA	202	Ring	Brno	Lenerz- de Wilde documentation
Blučina	Czech Republic	1	EBA	180	Ring	Brno	Lenerz- de Wilde documentation
Blučina	Czech Republic	1	EBA	199	Ring	Brno	Lenerz- de Wilde documentation
Blučina	Czech Republic	1	EBA	216	Ring	Brno	Lenerz- de Wilde documentation
Blučina	Czech Republic	1	EBA	215	Ring	Brno	Lenerz- de Wilde documentation
Blučina	Czech Republic	1	EBA	203	Ring	Brno	Lenerz- de Wilde documentation
Blučina	Czech Republic	1	EBA	205	Ring	Brno	Lenerz- de Wilde documentation
Blučina	Czech Republic	1	EBA	211	Ring	Brno	Lenerz- de Wilde documentation
Blučina	Czech Republic	1	EBA	196	Ring	Brno	Lenerz- de Wilde documentation
Blučina	Czech Republic	1	EBA	207	Ring	Brno	Lenerz- de Wilde documentation
Blučina	Czech Republic	1	EBA	201	Ring	Brno	Lenerz- de Wilde documentation
Blučina	Czech Republic	1	EBA	189	Ring	Brno	Lenerz- de Wilde documentation
Blučina	Czech Republic	1	EBA	182	Ring	Brno	Lenerz- de Wilde documentation
Blučina	Czech Republic	1	EBA	201	Ring	Brno	Lenerz- de Wilde documentation
Blučina	Czech Republic	1	EBA	167	Ring	Brno	Lenerz- de Wilde documentation
Blučina	Czech Republic	1	EBA	211	Ring	Brno	Lenerz- de Wilde documentation
Blučina	Czech Republic	1	EBA	200	Ring	Brno	Lenerz- de Wilde documentation
Blučina	Czech Republic	1	EBA	190	Ring	Brno	Lenerz- de Wilde documentation
Blučina	Czech Republic	1	EBA	198	Ring	Brno	Lenerz- de Wilde documentation
Blučina	Czech Republic	1	EBA	191	Ring	Brno	Lenerz- de Wilde documentation
Blučina	Czech Republic	1	EBA	219	Ring	Brno	Lenerz- de Wilde documentation
Blučina	Czech Republic	1	EBA	190	Ring	Brno	Lenerz- de Wilde documentation
Blučina	Czech Republic	1	EBA	204	Ring	Brno	Lenerz- de Wilde documentation
Bresinchen	Germany	2	EBA	178	Ring	Brandenburg	Lenerz- de Wilde documentation
Bresinchen	Germany	2	EBA	102	Ring	Brandenburg	Lenerz- de Wilde documentation
Bresinchen	Germany	2	EBA	112	Ring	Brandenburg	Lenerz- de Wilde documentation
Bresinchen	Germany	2	EBA	177	Ring	Brandenburg	Lenerz- de Wilde documentation
Bresinchen	Germany	2	EBA	169	Ring	Brandenburg	Lenerz- de Wilde documentation
Bresinchen	Germany	2	EBA	120	Ring	Brandenburg	Lenerz- de Wilde documentation
Bresinchen	Germany	2	EBA	92	Ring	Brandenburg	Lenerz- de Wilde documentation
Bresinchen	Germany	2	EBA	199	Ring	Brandenburg	Lenerz- de Wilde documentation
Bresinchen	Germany	2	EBA	130	Ring	Brandenburg	Lenerz- de Wilde documentation
Bubeneč	Czech Republic	1	EBA	196	Ring	Prague 2	Moucha 2005
Bubeneč	Czech Republic	1	EBA	163	Ring	Prague 2	Moucha 2005
Bubeneč	Czech Republic	1	EBA	210	Ring	Prague 2	Moucha 2005
Bubeneč	Czech Republic	1	EBA	210	Ring	Prague 2	Moucha 2005
Bubeneč	Czech Republic	1	EBA	159	Ring	Prague 2	Moucha 2005
Carsdorf (Pegau)	Germany	2	EBA	203	Ring	Leipzig	Lenerz- de Wilde documentation
Carsdorf (Pegau)	Germany	2	EBA	185	Ring	Leipzig	Lenerz- de Wilde documentation
Carsdorf (Pegau)	Germany	2	EBA	201	Ring	Leipzig	Lenerz- de Wilde documentation
Carsdorf (Pegau)	Germany	2	EBA	206	Ring	Leipzig	Lenerz- de Wilde documentation
Carsdorf (Pegau)	Germany	2	EBA	207	Ring	Leipzig	Lenerz- de Wilde documentation
Carsdorf (Pegau)	Germany	2	EBA	189	Ring	Leipzig	Lenerz- de Wilde documentation
Čelákovice	Czech Republic	1	EBA	136	Ring	Čelákovice	Moucha 2005
Čelákovice	Czech Republic	1	EBA	213	Ring	Čelákovice	Moucha 2005
Čelákovice	Czech Republic	1	EBA	218	Ring	Čelákovice	Moucha 2005
Čelákovice	Czech Republic	1	EBA	200	Ring	Čelákovice	Moucha 2005
Čelákovice	Czech Republic	1	EBA	198	Ring	Čelákovice	Moucha 2005
Čelákovice	Czech Republic	1	EBA	212	Ring	Čelákovice	Moucha 2005
Čelákovice	Czech Republic	1	EBA	180	Ring	Čelákovice	Moucha 2005
Čelákovice	Czech Republic	1	EBA	211	Ring	Čelákovice	Moucha 2005
Čelákovice	Czech Republic	1	EBA	208	Ring	Čelákovice	Moucha 2005
Dieskau	Germany	2	EBA	220	Ring	Halle	Lenerz- de Wilde documentation
Dieskau	Germany	2	EBA	221	Ring	Halle	Lenerz- de Wilde documentation
Dieskau	Germany	2	EBA	205	Ring	Halle	Lenerz- de Wilde documentation
Dieskau	Germany	2	EBA	201	Ring	Halle	Lenerz- de Wilde documentation
Dieskau	Germany	2	EBA	213	Ring	Halle	Lenerz- de Wilde documentation
Dieskau	Germany	2	EBA	215	Ring	Halle	Lenerz- de Wilde documentation
Dieskau	Germany	2	EBA	202	Ring	Halle	Lenerz- de Wilde documentation
Dieskau	Germany	2	EBA	193	Ring	Halle	Lenerz- de Wilde documentation
Dieskau	Germany	2	EBA	198	Ring	Halle	Lenerz- de Wilde documentation
Dieskau	Germany	2	EBA	205	Ring	Halle	Lenerz- de Wilde documentation
Dobročkovice	Czech Republic	1	EBA	153	Ring	Brno	Lenerz- de Wilde documentation
Dobročkovice	Czech Republic	1	EBA	184	Ring	Brno	Lenerz- de Wilde documentation
Dobročkovice	Czech Republic	1	EBA	189	Ring	Brno	Lenerz- de Wilde documentation
Dobročkovice	Czech Republic	1	EBA	157	Ring	Brno	Lenerz- de Wilde documentation
Dobročkovice	Czech Republic	1	EBA	189	Ring	Brno	Lenerz- de Wilde documentation
Dresden-Prohlis	Germany	2	EBA	190	Ring	Dresden	Lenerz- de Wilde documentation
Dresden-Prohlis	Germany	2	EBA	195	Ring	Dresden	Lenerz- de Wilde documentation
Dušníky nad Vltavou	Czech Republic	1	EBA	205	Ring	Prague//Roudnice nad Labem	Moucha 2005
Dušníky nad Vltavou	Czech Republic	1	EBA	67	Ring	Prague//Roudnice nad Labem	Moucha 2005
Dušníky nad Vltavou	Czech Republic	1	EBA	186	Ring	Prague//Roudnice nad Labem	Moucha 2005
Dušníky nad Vltavou	Czech Republic	1	EBA	206	Ring	Prague//Roudnice nad Labem	Moucha 2005
Dušníky nad Vltavou	Czech Republic	1	EBA	195	Ring	Prague//Roudnice nad Labem	Moucha 2005
Dušníky nad Vltavou	Czech Republic	1	EBA	222	Ring	Prague//Roudnice nad Labem	Moucha 2005
Dušníky nad Vltavou	Czech Republic	1	EBA	202	Ring	Prague//Roudnice nad Labem	Moucha 2005
Dušníky nad Vltavou	Czech Republic	1	EBA	215	Ring	Prague//Roudnice nad Labem	Moucha 2005
Dušníky nad Vltavou	Czech Republic	1	EBA	185	Ring	Prague//Roudnice nad Labem	Moucha 2005
Dušníky nad Vltavou	Czech Republic	1	EBA	181	Ring	Prague//Roudnice nad Labem	Moucha 2005
Dušníky nad Vltavou	Czech Republic	1	EBA	185	Ring	Prague//Roudnice nad Labem	Moucha 2005
Dušníky nad Vltavou	Czech Republic	1	EBA	200	Ring	Prague//Roudnice nad Labem	Moucha 2005
Dušníky nad Vltavou	Czech Republic	1	EBA	217	Ring	Prague//Roudnice nad Labem	Moucha 2005
Dušníky nad Vltavou	Czech Republic	1	EBA	152	Ring	Prague//Roudnice nad Labem	Moucha 2005
Dušníky nad Vltavou	Czech Republic	1	EBA	189	Ring	Prague//Roudnice nad Labem	Moucha 2005
Dušníky nad Vltavou	Czech Republic	1	EBA	200	Ring	Prague//Roudnice nad Labem	Moucha 2005
Dušníky nad Vltavou	Czech Republic	1	EBA	204	Ring	Prague//Roudnice nad Labem	Moucha 2005
Dušníky nad Vltavou	Czech Republic	1	EBA	191	Ring	Prague//Roudnice nad Labem	Moucha 2005
Ebersdorf an den Zaya	Austria	1	EBA	216	Ring	Vienna	Lenerz- de Wilde documentation
Ebersdorf an den Zaya	Austria	1	EBA	197	Ring	Vienna	Lenerz- de Wilde documentation
Ebersdorf an den Zaya	Austria	1	EBA	204	Ring	Vienna	Lenerz- de Wilde documentation
Ebersdorf an den Zaya	Austria	1	EBA	192	Ring	Vienna	Lenerz- de Wilde documentation
Ebersdorf an den Zaya	Austria	1	EBA	194	Ring	Vienna	Lenerz- de Wilde documentation
Ebersdorf an den Zaya	Austria	1	EBA	210	Ring	Vienna	Lenerz- de Wilde documentation
Ebersdorf an den Zaya	Austria	1	EBA	195	Ring	Vienna	Lenerz- de Wilde documentation
Ebersdorf an den Zaya	Austria	1	EBA	191	Ring	Vienna	Lenerz- de Wilde documentation
Ebersdorf an den Zaya	Austria	1	EBA	205	Ring	Vienna	Lenerz- de Wilde documentation
Ebersdorf an den Zaya	Austria	1	EBA	179	Ring	Vienna	Lenerz- de Wilde documentation
Ebersdorf an den Zaya	Austria	1	EBA	209	Ring	Vienna	Lenerz- de Wilde documentation
Ebersdorf an den Zaya	Austria	1	EBA	189	Ring	Vienna	Lenerz- de Wilde documentation
Ebersdorf an den Zaya	Austria	1	EBA	199	Ring	Vienna	Lenerz- de Wilde documentation
Ebersdorf an den Zaya	Austria	1	EBA	189	Ring	Vienna	Lenerz- de Wilde documentation
Ebersdorf an den Zaya	Austria	1	EBA	204	Ring	Vienna	Lenerz- de Wilde documentation
Ebersdorf an den Zaya	Austria	1	EBA	198	Ring	Vienna	Lenerz- de Wilde documentation
Ebersdorf an den Zaya	Austria	1	EBA	185	Ring	Vienna	Lenerz- de Wilde documentation
Fürth	Austria	1	EBA	204	Ring	Vienna	Lenerz- de Wilde documentation
Fürth	Austria	1	EBA	175	Ring	Vienna	Lenerz- de Wilde documentation
Fürth	Austria	1	EBA	189	Ring	Vienna	Lenerz- de Wilde documentation
Fürth	Austria	1	EBA	195	Ring	Vienna	Lenerz- de Wilde documentation
Fürth	Austria	1	EBA	227	Ring	Vienna	Lenerz- de Wilde documentation
Fürth	Austria	1	EBA	190	Ring	Vienna	Lenerz- de Wilde documentation
Fürth	Austria	1	EBA	224	Ring	Vienna	Lenerz- de Wilde documentation
Fürth	Austria	1	EBA	195	Ring	Vienna	Lenerz- de Wilde documentation
Fürth	Austria	1	EBA	172	Ring	Vienna	Lenerz- de Wilde documentation
Fürth	Austria	1	EBA	201	Ring	Vienna	Lenerz- de Wilde documentation
Fürth	Austria	1	EBA	136	Ring	Vienna	Lenerz- de Wilde documentation
Fürth	Austria	1	EBA	202	Ring	Vienna	Lenerz- de Wilde documentation
Fürth	Austria	1	EBA	203	Ring	Vienna	Lenerz- de Wilde documentation
Gammersham	Germany	1	EBA	177	Ring	Munich	Lenerz- de Wilde documentation
Gammersham	Germany	1	EBA	176	Ring	Munich	Lenerz- de Wilde documentation
Gammersham	Germany	1	EBA	197	Ring	Munich	Lenerz- de Wilde documentation
Gammersham	Germany	1	EBA	213	Ring	Munich	Lenerz- de Wilde documentation
Gammersham	Germany	1	EBA	170	Ring	Munich	Lenerz- de Wilde documentation
Gammersham	Germany	1	EBA	203	Ring	Munich	Lenerz- de Wilde documentation
Gammersham	Germany	1	EBA	211	Ring	Munich	Lenerz- de Wilde documentation
Gammersham	Germany	1	EBA	165	Ring	Munich	Lenerz- de Wilde documentation
Gammersham	Germany	1	EBA	257	Ring	Munich	Lenerz- de Wilde documentation
Gammersham	Germany	1	EBA	167	Ring	Munich	Lenerz- de Wilde documentation
Gammersham	Germany	1	EBA	161	Ring	Munich	Lenerz- de Wilde documentation
Gammersham	Germany	1	EBA	160	Ring	Munich	Lenerz- de Wilde documentation
Gammersham	Germany	1	EBA	169	Ring	Munich	Lenerz- de Wilde documentation
Gammersham	Germany	1	EBA	173	Ring	Munich	Lenerz- de Wilde documentation
Gammersham	Germany	1	EBA	158	Ring	Munich	Lenerz- de Wilde documentation
Gammersham	Germany	1	EBA	186	Ring	Munich	Lenerz- de Wilde documentation
Gammersham	Germany	1	EBA	179	Ring	Munich	Lenerz- de Wilde documentation
Gammersham	Germany	1	EBA	177	Ring	Munich	Lenerz- de Wilde documentation
Gammersham	Germany	1	EBA	169	Ring	Munich	Lenerz- de Wilde documentation
Gammersham	Germany	1	EBA	187	Ring	Munich	Lenerz- de Wilde documentation
Gammersham	Germany	1	EBA	157	Ring	Munich	Lenerz- de Wilde documentation
Gammersham	Germany	1	EBA	171	Ring	Munich	Lenerz- de Wilde documentation
Gammersham	Germany	1	EBA	188	Ring	Munich	Lenerz- de Wilde documentation
Gammersham	Germany	1	EBA	174	Ring	Munich	Lenerz- de Wilde documentation
Gammersham	Germany	1	EBA	184	Ring	Munich	Lenerz- de Wilde documentation
Gammersham	Germany	1	EBA	160	Ring	Munich	Lenerz- de Wilde documentation
Gammersham	Germany	1	EBA	182	Ring	Munich	Lenerz- de Wilde documentation
Gammersham	Germany	1	EBA	152	Ring	Munich	Lenerz- de Wilde documentation
Gammersham	Germany	1	EBA	175	Ring	Munich	Lenerz- de Wilde documentation
Gammersham	Germany	1	EBA	153	Ring	Munich	Lenerz- de Wilde documentation
Gammersham	Germany	1	EBA	175	Ring	Munich	Lenerz- de Wilde documentation
Gammersham	Germany	1	EBA	182	Ring	Munich	Lenerz- de Wilde documentation
Gammersham	Germany	1	EBA	148	Ring	Munich	Lenerz- de Wilde documentation
Gammersham	Germany	1	EBA	165	Ring	Munich	Lenerz- de Wilde documentation
Gammersham	Germany	1	EBA	162	Ring	Munich	Lenerz- de Wilde documentation
Gammersham	Germany	1	EBA	143	Ring	Munich	Lenerz- de Wilde documentation
Gammersham	Germany	1	EBA	172	Ring	Munich	Lenerz- de Wilde documentation
Gammersham	Germany	1	EBA	152	Ring	Munich	Lenerz- de Wilde documentation
Gammersham	Germany	1	EBA	153	Ring	Munich	Lenerz- de Wilde documentation
Gammersham	Germany	1	EBA	142	Ring	Munich	Lenerz- de Wilde documentation
Gammersham	Germany	1	EBA	169	Ring	Munich	Lenerz- de Wilde documentation
Gammersham	Germany	1	EBA	151	Ring	Munich	Lenerz- de Wilde documentation
Gammersham	Germany	1	EBA	197	Ring	Munich	Lenerz- de Wilde documentation
Gammersham	Germany	1	EBA	176	Ring	Munich	Lenerz- de Wilde documentation
Gammersham	Germany	1	EBA	144	Ring	Munich	Lenerz- de Wilde documentation
Gammersham	Germany	1	EBA	188	Ring	Munich	Lenerz- de Wilde documentation
Gammersham	Germany	1	EBA	174	Ring	Munich	Lenerz- de Wilde documentation
Gammersham	Germany	1	EBA	164	Ring	Munich	Lenerz- de Wilde documentation
Gammersham	Germany	1	EBA	164	Ring	Munich	Lenerz- de Wilde documentation
Gammersham	Germany	1	EBA	187	Ring	Munich	Lenerz- de Wilde documentation
Gammersham	Germany	1	EBA	218	Ring	Munich	Lenerz- de Wilde documentation
Gammersham	Germany	1	EBA	158	Ring	Munich	Lenerz- de Wilde documentation
Gammersham	Germany	1	EBA	175	Ring	Munich	Lenerz- de Wilde documentation
Gammersham	Germany	1	EBA	185	Ring	Munich	Lenerz- de Wilde documentation
Gammersham	Germany	1	EBA	194	Ring	Munich	Lenerz- de Wilde documentation
Gammersham	Germany	1	EBA	140	Ring	Munich	Lenerz- de Wilde documentation
Gammersham	Germany	1	EBA	180	Ring	Munich	Lenerz- de Wilde documentation
Gammersham	Germany	1	EBA	198	Ring	Munich	Lenerz- de Wilde documentation
Gammersham	Germany	1	EBA	167	Ring	Munich	Lenerz- de Wilde documentation
Gammersham	Germany	1	EBA	140	Ring	Munich	Lenerz- de Wilde documentation
Gammersham	Germany	1	EBA	180	Ring	Munich	Lenerz- de Wilde documentation
Gammersham	Germany	1	EBA	165	Ring	Munich	Lenerz- de Wilde documentation
Gammersham	Germany	1	EBA	159	Ring	Munich	Lenerz- de Wilde documentation
Gammersham	Germany	1	EBA	142	Ring	Munich	Lenerz- de Wilde documentation
Gammersham	Germany	1	EBA	236	Ring	Munich	Lenerz- de Wilde documentation
Gammersham	Germany	1	EBA	172	Ring	Munich	Lenerz- de Wilde documentation
Gammersham	Germany	1	EBA	186	Ring	Munich	Lenerz- de Wilde documentation
Gammersham	Germany	1	EBA	188	Ring	Munich	Lenerz- de Wilde documentation
Gammersham	Germany	1	EBA	205	Ring	Munich	Lenerz- de Wilde documentation
Gammersham	Germany	1	EBA	169	Ring	Munich	Lenerz- de Wilde documentation
Gammersham	Germany	1	EBA	175	Ring	Munich	Lenerz- de Wilde documentation
Gammersham	Germany	1	EBA	152	Ring	Munich	Lenerz- de Wilde documentation
Gammersham	Germany	1	EBA	182	Ring	Munich	Lenerz- de Wilde documentation
Gammersham	Germany	1	EBA	146	Ring	Munich	Lenerz- de Wilde documentation
Gammersham	Germany	1	EBA	152	Ring	Munich	Lenerz- de Wilde documentation
Gammersham	Germany	1	EBA	184	Ring	Munich	Lenerz- de Wilde documentation
Gammersham	Germany	1	EBA	166	Ring	Munich	Lenerz- de Wilde documentation
Gammersham	Germany	1	EBA	130	Ring	Munich	Lenerz- de Wilde documentation
Gammersham	Germany	1	EBA	157	Ring	Munich	Lenerz- de Wilde documentation
Gammersham	Germany	1	EBA	189	Ring	Munich	Lenerz- de Wilde documentation
Gammersham	Germany	1	EBA	180	Ring	Munich	Lenerz- de Wilde documentation
Gammersham	Germany	1	EBA	213	Ring	Munich	Lenerz- de Wilde documentation
Gammersham	Germany	1	EBA	175	Ring	Munich	Lenerz- de Wilde documentation
Gammersham	Germany	1	EBA	150	Ring	Munich	Lenerz- de Wilde documentation
Gammersham	Germany	1	EBA	197	Ring	Munich	Lenerz- de Wilde documentation
Gammersham	Germany	1	EBA	204	Ring	Munich	Lenerz- de Wilde documentation
Gammersham	Germany	1	EBA	177	Ring	Munich	Lenerz- de Wilde documentation
Gammersham	Germany	1	EBA	176	Ring	Munich	Lenerz- de Wilde documentation
Gammersham	Germany	1	EBA	238	Ring	Munich	Lenerz- de Wilde documentation
Gammersham	Germany	1	EBA	175	Ring	Munich	Lenerz- de Wilde documentation
Gammersham	Germany	1	EBA	172	Ring	Munich	Lenerz- de Wilde documentation
Gammersham	Germany	1	EBA	166	Ring	Munich	Lenerz- de Wilde documentation
Gammersham	Germany	1	EBA	192	Ring	Munich	Lenerz- de Wilde documentation
Gammersham	Germany	1	EBA	210	Ring	Munich	Lenerz- de Wilde documentation
Gammersham	Germany	1	EBA	166	Ring	Munich	Lenerz- de Wilde documentation
Gammersham	Germany	1	EBA	182	Ring	Munich	Lenerz- de Wilde documentation
Gammersham	Germany	1	EBA	164	Ring	Munich	Lenerz- de Wilde documentation
Gammersham	Germany	1	EBA	174	Ring	Munich	Lenerz- de Wilde documentation
Gammersham	Germany	1	EBA	193	Ring	Munich	Lenerz- de Wilde documentation
Gammersham	Germany	1	EBA	172	Ring	Munich	Lenerz- de Wilde documentation
Gammersham	Germany	1	EBA	174	Ring	Munich	Lenerz- de Wilde documentation
Gammersham	Germany	1	EBA	177	Ring	Munich	Lenerz- de Wilde documentation
Gammersham	Germany	1	EBA	217	Ring	Munich	Lenerz- de Wilde documentation
Gammersham	Germany	1	EBA	176	Ring	Munich	Lenerz- de Wilde documentation
Gammersham	Germany	1	EBA	255	Ring	Munich	Lenerz- de Wilde documentation
Gammersham	Germany	1	EBA	221	Ring	Munich	Lenerz- de Wilde documentation
Gammersham	Germany	1	EBA	159	Ring	Munich	Lenerz- de Wilde documentation
Gammersham	Germany	1	EBA	179	Ring	Munich	Lenerz- de Wilde documentation
Geitzendorf	Austria	1	EBA	212	Ring	Vienna	Lenerz- de Wilde documentation
Geitzendorf	Austria	1	EBA	204	Ring	Vienna	Lenerz- de Wilde documentation
Geitzendorf	Austria	1	EBA	225	Ring	Vienna	Lenerz- de Wilde documentation
Geitzendorf	Austria	1	EBA	216	Ring	Vienna	Lenerz- de Wilde documentation
Geitzendorf	Austria	1	EBA	203	Ring	Vienna	Lenerz- de Wilde documentation
Geitzendorf	Austria	1	EBA	195	Ring	Vienna	Lenerz- de Wilde documentation
Geitzendorf	Austria	1	EBA	218	Ring	Vienna	Lenerz- de Wilde documentation
Geitzendorf	Austria	1	EBA	203	Ring	Vienna	Lenerz- de Wilde documentation
Geitzendorf	Austria	1	EBA	210	Ring	Vienna	Lenerz- de Wilde documentation
Geitzendorf	Austria	1	EBA	213	Ring	Vienna	Lenerz- de Wilde documentation
Geitzendorf	Austria	1	EBA	210	Ring	Vienna	Lenerz- de Wilde documentation
Geitzendorf	Austria	1	EBA	223	Ring	Vienna	Lenerz- de Wilde documentation
Geitzendorf	Austria	1	EBA	216	Ring	Vienna	Lenerz- de Wilde documentation
Geitzendorf	Austria	1	EBA	199	Ring	Vienna	Lenerz- de Wilde documentation
Geitzendorf	Austria	1	EBA	206	Ring	Vienna	Lenerz- de Wilde documentation
Geitzendorf	Austria	1	EBA	208	Ring	Vienna	Lenerz- de Wilde documentation
Geitzendorf	Austria	1	EBA	225	Ring	Vienna	Lenerz- de Wilde documentation
Geitzendorf	Austria	1	EBA	210	Ring	Vienna	Lenerz- de Wilde documentation
Geitzendorf	Austria	1	EBA	209	Ring	Vienna	Lenerz- de Wilde documentation
Geitzendorf	Austria	1	EBA	205	Ring	Vienna	Lenerz- de Wilde documentation
Geitzendorf	Austria	1	EBA	207	Ring	Vienna	Lenerz- de Wilde documentation
Geitzendorf	Austria	1	EBA	210	Ring	Vienna	Lenerz- de Wilde documentation
Geitzendorf	Austria	1	EBA	203	Ring	Vienna	Lenerz- de Wilde documentation
Geitzendorf	Austria	1	EBA	208	Ring	Vienna	Lenerz- de Wilde documentation
Geitzendorf	Austria	1	EBA	212	Ring	Vienna	Lenerz- de Wilde documentation
Geitzendorf	Austria	1	EBA	201	Ring	Vienna	Lenerz- de Wilde documentation
Geitzendorf	Austria	1	EBA	220	Ring	Vienna	Lenerz- de Wilde documentation
Geitzendorf	Austria	1	EBA	204	Ring	Vienna	Lenerz- de Wilde documentation
Geitzendorf	Austria	1	EBA	206	Ring	Vienna	Lenerz- de Wilde documentation
Geitzendorf	Austria	1	EBA	202	Ring	Vienna	Lenerz- de Wilde documentation
Geitzendorf	Austria	1	EBA	202	Ring	Vienna	Lenerz- de Wilde documentation
Geitzendorf	Austria	1	EBA	198	Ring	Vienna	Lenerz- de Wilde documentation
Geitzendorf	Austria	1	EBA	204	Ring	Vienna	Lenerz- de Wilde documentation
Geitzendorf	Austria	1	EBA	211	Ring	Vienna	Lenerz- de Wilde documentation
Geitzendorf	Austria	1	EBA	212	Ring	Vienna	Lenerz- de Wilde documentation
Geitzendorf	Austria	1	EBA	205	Ring	Vienna	Lenerz- de Wilde documentation
Geitzendorf	Austria	1	EBA	202	Ring	Vienna	Lenerz- de Wilde documentation
Geitzendorf	Austria	1	EBA	208	Ring	Vienna	Lenerz- de Wilde documentation
Geitzendorf	Austria	1	EBA	232	Ring	Vienna	Lenerz- de Wilde documentation
Geitzendorf	Austria	1	EBA	200	Ring	Vienna	Lenerz- de Wilde documentation
Geitzendorf	Austria	1	EBA	204	Ring	Vienna	Lenerz- de Wilde documentation
Geitzendorf	Austria	1	EBA	210	Ring	Vienna	Lenerz- de Wilde documentation
Geitzendorf	Austria	1	EBA	213	Ring	Vienna	Lenerz- de Wilde documentation
Geitzendorf	Austria	1	EBA	199	Ring	Vienna	Lenerz- de Wilde documentation
Geitzendorf	Austria	1	EBA	205	Ring	Vienna	Lenerz- de Wilde documentation
Geitzendorf	Austria	1	EBA	217	Ring	Vienna	Lenerz- de Wilde documentation
Geitzendorf	Austria	1	EBA	198	Ring	Vienna	Lenerz- de Wilde documentation
Geitzendorf	Austria	1	EBA	211	Ring	Vienna	Lenerz- de Wilde documentation
Geitzendorf	Austria	1	EBA	215	Ring	Vienna	Lenerz- de Wilde documentation
Geitzendorf	Austria	1	EBA	172	Ring	Vienna	Lenerz- de Wilde documentation
Geitzendorf	Austria	1	EBA	203	Ring	Vienna	Lenerz- de Wilde documentation
Geitzendorf	Austria	1	EBA	219	Ring	Vienna	Lenerz- de Wilde documentation
Geitzendorf	Austria	1	EBA	208	Ring	Vienna	Lenerz- de Wilde documentation
Geitzendorf	Austria	1	EBA	212	Ring	Vienna	Lenerz- de Wilde documentation
Geitzendorf	Austria	1	EBA	213	Ring	Vienna	Lenerz- de Wilde documentation
Geitzendorf	Austria	1	EBA	201	Ring	Vienna	Lenerz- de Wilde documentation
Geitzendorf	Austria	1	EBA	183	Ring	Vienna	Lenerz- de Wilde documentation
Glogów Milana	Poland	2	EBA	195.7	Ring	Głogów	Lenerz- de Wilde documentation
Glogów Milana	Poland	2	EBA	198.7	Ring	Głogów	Lenerz- de Wilde documentation
Glogów Milana	Poland	2	EBA	218.7	Ring	Głogów	Lenerz- de Wilde documentation
Glogów Milana	Poland	2	EBA	185.1	Ring	Głogów	Lenerz- de Wilde documentation
Glogów Milana	Poland	2	EBA	196	Ring	Głogów	Lenerz- de Wilde documentation
Glogów Milana	Poland	2	EBA	202.8	Ring	Głogów	Lenerz- de Wilde documentation
Glogów Milana	Poland	2	EBA	190.6	Ring	Głogów	Lenerz- de Wilde documentation
Glogów Milana	Poland	2	EBA	199.6	Ring	Głogów	Lenerz- de Wilde documentation
Glogów Milana	Poland	2	EBA	193.5	Ring	Głogów	Lenerz- de Wilde documentation
Glogów Milana	Poland	2	EBA	189.1	Ring	Głogów	Lenerz- de Wilde documentation
Glogów Milana	Poland	2	EBA	189.3	Ring	Głogów	Lenerz- de Wilde documentation
Glogów Milana	Poland	2	EBA	196	Ring	Głogów	Lenerz- de Wilde documentation
Glogów Milana	Poland	2	EBA	201.6	Ring	Głogów	Lenerz- de Wilde documentation
Granowo	Poland	2	EBA	174	Ring	Poznań	Lenerz- de Wilde documentation
Granowo	Poland	2	EBA	184	Ring	Poznań	Lenerz- de Wilde documentation
Granowo	Poland	2	EBA	198	Ring	Poznań	Lenerz- de Wilde documentation
Granowo	Poland	2	EBA	193	Ring	Poznań	Lenerz- de Wilde documentation
Granowo	Poland	2	EBA	212	Ring	Poznań	Lenerz- de Wilde documentation
Greding	Germany	1	EBA	78.51	Rib	Greding	Lenerz- de Wilde documentation
Greding	Germany	1	EBA	85.57	Rib	Greding	Lenerz- de Wilde documentation
Greding	Germany	1	EBA	80.6	Rib	Greding	Lenerz- de Wilde documentation
Greding	Germany	1	EBA	84.46	Rib	Greding	Lenerz- de Wilde documentation
Greding	Germany	1	EBA	79.48	Rib	Greding	Lenerz- de Wilde documentation
Greding	Germany	1	EBA	81.74	Rib	Greding	Lenerz- de Wilde documentation
Greding	Germany	1	EBA	73.86	Rib	Greding	Lenerz- de Wilde documentation
Greding	Germany	1	EBA	68.39	Rib	Greding	Lenerz- de Wilde documentation
Greding	Germany	1	EBA	81.14	Rib	Greding	Lenerz- de Wilde documentation
Greding	Germany	1	EBA	73.28	Rib	Greding	Lenerz- de Wilde documentation
Greding	Germany	1	EBA	74.09	Rib	Greding	Lenerz- de Wilde documentation
Greding	Germany	1	EBA	84.56	Rib	Greding	Lenerz- de Wilde documentation
Greding	Germany	1	EBA	89.86	Rib	Greding	Lenerz- de Wilde documentation
Greding	Germany	1	EBA	76.25	Rib	Greding	Lenerz- de Wilde documentation
Greding	Germany	1	EBA	81.98	Rib	Greding	Lenerz- de Wilde documentation
Greding	Germany	1	EBA	78.63	Rib	Greding	Lenerz- de Wilde documentation
Greding	Germany	1	EBA	94.98	Rib	Greding	Lenerz- de Wilde documentation
Greding	Germany	1	EBA	75.62	Rib	Greding	Lenerz- de Wilde documentation
Greding	Germany	1	EBA	110.57	Rib	Greding	Lenerz- de Wilde documentation
Greding	Germany	1	EBA	103.91	Rib	Greding	Lenerz- de Wilde documentation
Greding	Germany	1	EBA	102.87	Rib	Greding	Lenerz- de Wilde documentation
Greding	Germany	1	EBA	104.78	Rib	Greding	Lenerz- de Wilde documentation
Greding	Germany	1	EBA	62.5	Rib	Greding	Lenerz- de Wilde documentation
Greding	Germany	1	EBA	104.62	Rib	Greding	Lenerz- de Wilde documentation
Greding	Germany	1	EBA	85.69	Rib	Greding	Lenerz- de Wilde documentation
Greding	Germany	1	EBA	86.08	Rib	Greding	Lenerz- de Wilde documentation
Hagelstadt	Germany	1	EBA	212	Ring	Munich//Regensburg	Lenerz- de Wilde documentation
Hagelstadt	Germany	1	EBA	173	Ring	Munich//Regensburg	Lenerz- de Wilde documentation
Hagelstadt	Germany	1	EBA	178	Ring	Munich//Regensburg	Lenerz- de Wilde documentation
Hagelstadt	Germany	1	EBA	182	Ring	Munich//Regensburg	Lenerz- de Wilde documentation
Hagelstadt	Germany	1	EBA	180	Ring	Munich//Regensburg	Lenerz- de Wilde documentation
Hagelstadt	Germany	1	EBA	190	Ring	Munich//Regensburg	Lenerz- de Wilde documentation
Hagelstadt	Germany	1	EBA	196	Ring	Munich//Regensburg	Lenerz- de Wilde documentation
Hagelstadt	Germany	1	EBA	187	Ring	Munich//Regensburg	Lenerz- de Wilde documentation
Hagelstadt	Germany	1	EBA	205	Ring	Munich//Regensburg	Lenerz- de Wilde documentation
Hagelstadt	Germany	1	EBA	212	Ring	Munich//Regensburg	Lenerz- de Wilde documentation
Hagelstadt	Germany	1	EBA	240	Ring	Munich//Regensburg	Lenerz- de Wilde documentation
Hagelstadt	Germany	1	EBA	205	Ring	Munich//Regensburg	Lenerz- de Wilde documentation
Harmannsdorf	Austria	1	EBA	93	Rib	Vienna	Lenerz- de Wilde documentation
Harmannsdorf	Austria	1	EBA	99	Rib	Vienna	Lenerz- de Wilde documentation
Harmannsdorf	Austria	1	EBA	101	Rib	Vienna	Lenerz- de Wilde documentation
Harmannsdorf	Austria	1	EBA	100	Rib	Vienna	Lenerz- de Wilde documentation
Harmannsdorf	Austria	1	EBA	106	Rib	Vienna	Lenerz- de Wilde documentation
Harmannsdorf	Austria	1	EBA	114	Rib	Vienna	Lenerz- de Wilde documentation
Harmannsdorf	Austria	1	EBA	104	Rib	Vienna	Lenerz- de Wilde documentation
Harmannsdorf	Austria	1	EBA	97	Rib	Vienna	Lenerz- de Wilde documentation
Harmannsdorf	Austria	1	EBA	96	Rib	Vienna	Lenerz- de Wilde documentation
Harmannsdorf	Austria	1	EBA	102	Rib	Vienna	Lenerz- de Wilde documentation
Harmannsdorf	Austria	1	EBA	87	Rib	Vienna	Lenerz- de Wilde documentation
Harmannsdorf	Austria	1	EBA	106	Rib	Vienna	Lenerz- de Wilde documentation
Harmannsdorf	Austria	1	EBA	114	Rib	Vienna	Lenerz- de Wilde documentation
Harmannsdorf	Austria	1	EBA	105	Rib	Vienna	Lenerz- de Wilde documentation
Harmannsdorf	Austria	1	EBA	102	Rib	Vienna	Lenerz- de Wilde documentation
Harmannsdorf	Austria	1	EBA	100	Rib	Vienna	Lenerz- de Wilde documentation
Harmannsdorf	Austria	1	EBA	105	Rib	Vienna	Lenerz- de Wilde documentation
Harmannsdorf	Austria	1	EBA	114	Rib	Vienna	Lenerz- de Wilde documentation
Havalda	Czech Republic	1	EBA	174	Rib	České Budějovice	Moucha 2005
Havalda	Czech Republic	1	EBA	176	Rib	České Budějovice	Moucha 2005
Havalda	Czech Republic	1	EBA	165	Rib	České Budějovice	Moucha 2005
Havalda	Czech Republic	1	EBA	200	Rib	České Budějovice	Moucha 2005
Havalda	Czech Republic	1	EBA	184	Rib	České Budějovice	Moucha 2005
Havalda	Czech Republic	1	EBA	199	Rib	České Budějovice	Moucha 2005
Havalda	Czech Republic	1	EBA	196	Rib	České Budějovice	Moucha 2005
Havalda	Czech Republic	1	EBA	171	Rib	České Budějovice	Moucha 2005
Havalda	Czech Republic	1	EBA	186	Rib	České Budějovice	Moucha 2005
Havalda	Czech Republic	1	EBA	188	Rib	České Budějovice	Moucha 2005
Havalda	Czech Republic	1	EBA	180	Rib	České Budějovice	Moucha 2005
Havalda	Czech Republic	1	EBA	194	Rib	České Budějovice	Moucha 2005
Havalda	Czech Republic	1	EBA	199	Rib	České Budějovice	Moucha 2005
Havalda	Czech Republic	1	EBA	207	Rib	České Budějovice	Moucha 2005
Havalda	Czech Republic	1	EBA	205	Rib	České Budějovice	Moucha 2005
Havalda	Czech Republic	1	EBA	185	Rib	České Budějovice	Moucha 2005
Havalda	Czech Republic	1	EBA	187	Rib	České Budějovice	Moucha 2005
Havalda	Czech Republic	1	EBA	176	Rib	České Budějovice	Moucha 2005
Havalda	Czech Republic	1	EBA	189	Rib	České Budějovice	Moucha 2005
Havalda	Czech Republic	1	EBA	179	Rib	České Budějovice	Moucha 2005
Havalda	Czech Republic	1	EBA	176	Rib	České Budějovice	Moucha 2005
Havalda	Czech Republic	1	EBA	172	Rib	České Budějovice	Moucha 2005
Havalda	Czech Republic	1	EBA	189	Rib	České Budějovice	Moucha 2005
Havalda	Czech Republic	1	EBA	190	Rib	České Budějovice	Moucha 2005
Havalda	Czech Republic	1	EBA	180	Rib	České Budějovice	Moucha 2005
Havalda	Czech Republic	1	EBA	189	Rib	České Budějovice	Moucha 2005
Havalda	Czech Republic	1	EBA	171	Rib	České Budějovice	Moucha 2005
Havalda	Czech Republic	1	EBA	208	Rib	České Budějovice	Moucha 2005
Havalda	Czech Republic	1	EBA	190	Rib	České Budějovice	Moucha 2005
Havalda	Czech Republic	1	EBA	180	Rib	České Budějovice	Moucha 2005
Havalda	Czech Republic	1	EBA	174	Rib	České Budějovice	Moucha 2005
Havalda	Czech Republic	1	EBA	174	Rib	České Budějovice	Moucha 2005
Havalda	Czech Republic	1	EBA	174	Rib	České Budějovice	Moucha 2005
Havalda	Czech Republic	1	EBA	177	Rib	České Budějovice	Moucha 2005
Havalda	Czech Republic	1	EBA	190	Rib	České Budějovice	Moucha 2005
Havalda	Czech Republic	1	EBA	188	Rib	České Budějovice	Moucha 2005
Havalda	Czech Republic	1	EBA	180	Rib	České Budějovice	Moucha 2005
Havalda	Czech Republic	1	EBA	174	Rib	České Budějovice	Moucha 2005
Havalda	Czech Republic	1	EBA	189	Rib	České Budějovice	Moucha 2005
Havalda	Czech Republic	1	EBA	190	Rib	České Budějovice	Moucha 2005
Havalda	Czech Republic	1	EBA	199	Rib	České Budějovice	Moucha 2005
Havalda	Czech Republic	1	EBA	187	Rib	České Budějovice	Moucha 2005
Havalda	Czech Republic	1	EBA	182	Rib	České Budějovice	Moucha 2005
Havalda	Czech Republic	1	EBA	193	Rib	České Budějovice	Moucha 2005
Havalda	Czech Republic	1	EBA	190	Rib	České Budějovice	Moucha 2005
Havalda	Czech Republic	1	EBA	172	Rib	České Budějovice	Moucha 2005
Havalda	Czech Republic	1	EBA	214	Rib	České Budějovice	Moucha 2005
Havalda	Czech Republic	1	EBA	186	Rib	České Budějovice	Moucha 2005
Havalda	Czech Republic	1	EBA	198	Rib	České Budějovice	Moucha 2005
Havalda	Czech Republic	1	EBA	174	Rib	České Budějovice	Moucha 2005
Havalda	Czech Republic	1	EBA	204	Rib	České Budějovice	Moucha 2005
Havalda	Czech Republic	1	EBA	179	Rib	České Budějovice	Moucha 2005
Havalda	Czech Republic	1	EBA	183	Rib	České Budějovice	Moucha 2005
Havalda	Czech Republic	1	EBA	179	Rib	České Budějovice	Moucha 2005
Havalda	Czech Republic	1	EBA	184	Rib	České Budějovice	Moucha 2005
Havalda	Czech Republic	1	EBA	177	Rib	České Budějovice	Moucha 2005
Havalda	Czech Republic	1	EBA	179	Rib	České Budějovice	Moucha 2005
Havalda	Czech Republic	1	EBA	206	Rib	České Budějovice	Moucha 2005
Havalda	Czech Republic	1	EBA	173	Rib	České Budějovice	Moucha 2005
Havalda	Czech Republic	1	EBA	198	Rib	České Budějovice	Moucha 2005
Havalda	Czech Republic	1	EBA	188	Rib	České Budějovice	Moucha 2005
Havalda	Czech Republic	1	EBA	191	Rib	České Budějovice	Moucha 2005
Havalda	Czech Republic	1	EBA	176	Rib	České Budějovice	Moucha 2005
Havalda	Czech Republic	1	EBA	175	Rib	České Budějovice	Moucha 2005
Havalda	Czech Republic	1	EBA	202	Rib	České Budějovice	Moucha 2005
Havalda	Czech Republic	1	EBA	180	Rib	České Budějovice	Moucha 2005
Havalda	Czech Republic	1	EBA	192	Rib	České Budějovice	Moucha 2005
Havalda	Czech Republic	1	EBA	187	Rib	České Budějovice	Moucha 2005
Havalda	Czech Republic	1	EBA	167	Rib	České Budějovice	Moucha 2005
Havalda	Czech Republic	1	EBA	170	Rib	České Budějovice	Moucha 2005
Havalda	Czech Republic	1	EBA	220	Rib	České Budějovice	Moucha 2005
Havalda	Czech Republic	1	EBA	190	Rib	České Budějovice	Moucha 2005
Havalda	Czech Republic	1	EBA	160	Rib	České Budějovice	Moucha 2005
Havalda	Czech Republic	1	EBA	183	Rib	České Budějovice	Moucha 2005
Havalda	Czech Republic	1	EBA	170	Rib	České Budějovice	Moucha 2005
Havalda	Czech Republic	1	EBA	183	Rib	České Budějovice	Moucha 2005
Havalda	Czech Republic	1	EBA	200	Rib	České Budějovice	Moucha 2005
Havalda	Czech Republic	1	EBA	180	Rib	České Budějovice	Moucha 2005
Havalda	Czech Republic	1	EBA	170	Rib	České Budějovice	Moucha 2005
Havalda	Czech Republic	1	EBA	180	Rib	České Budějovice	Moucha 2005
Havalda	Czech Republic	1	EBA	200	Rib	České Budějovice	Moucha 2005
Havalda	Czech Republic	1	EBA	180	Rib	České Budějovice	Moucha 2005
Havalda	Czech Republic	1	EBA	180	Rib	České Budějovice	Moucha 2005
Havalda	Czech Republic	1	EBA	200	Rib	České Budějovice	Moucha 2005
Havalda	Czech Republic	1	EBA	170	Rib	České Budějovice	Moucha 2005
Havalda	Czech Republic	1	EBA	193	Rib	České Budějovice	Moucha 2005
Havalda	Czech Republic	1	EBA	180	Rib	České Budějovice	Moucha 2005
Havalda	Czech Republic	1	EBA	185	Rib	České Budějovice	Moucha 2005
Havalda	Czech Republic	1	EBA	174	Rib	České Budějovice	Moucha 2005
Havalda	Czech Republic	1	EBA	180	Rib	České Budějovice	Moucha 2005
Havalda	Czech Republic	1	EBA	193	Rib	České Budějovice	Moucha 2005
Havalda	Czech Republic	1	EBA	181	Rib	České Budějovice	Moucha 2005
Havalda	Czech Republic	1	EBA	175	Rib	České Budějovice	Moucha 2005
Havalda	Czech Republic	1	EBA	192	Rib	České Budějovice	Moucha 2005
Havalda	Czech Republic	1	EBA	186	Rib	České Budějovice	Moucha 2005
Havalda	Czech Republic	1	EBA	198	Rib	České Budějovice	Moucha 2005
Havalda	Czech Republic	1	EBA	156	Rib	České Budějovice	Moucha 2005
Havalda	Czech Republic	1	EBA	157	Rib	České Budějovice	Moucha 2005
Havalda	Czech Republic	1	EBA	204	Rib	České Budějovice	Moucha 2005
Havalda	Czech Republic	1	EBA	191	Rib	České Budějovice	Moucha 2005
Havalda	Czech Republic	1	EBA	195	Rib	České Budějovice	Moucha 2005
Havalda	Czech Republic	1	EBA	191	Rib	České Budějovice	Moucha 2005
Hechendorf	Germany	1	EBA	139	Ring	Munich	Lenerz- de Wilde documentation
Hechendorf	Germany	1	EBA	88	Ring	Munich	Lenerz- de Wilde documentation
Hechendorf	Germany	1	EBA	52	Ring	Munich	Lenerz- de Wilde documentation
Hechendorf	Germany	1	EBA	84	Ring	Munich	Lenerz- de Wilde documentation
Hechendorf	Germany	1	EBA	91	Ring	Munich	Lenerz- de Wilde documentation
Hechendorf	Germany	1	EBA	89	Ring	Munich	Lenerz- de Wilde documentation
Heignkam	Germany	1	EBA	180	Ring	Munich	Lenerz- de Wilde documentation
Heignkam	Germany	1	EBA	195	Ring	Munich	Lenerz- de Wilde documentation
Heignkam	Germany	1	EBA	187	Ring	Munich	Lenerz- de Wilde documentation
Heignkam	Germany	1	EBA	209	Ring	Munich	Lenerz- de Wilde documentation
Heignkam	Germany	1	EBA	194	Ring	Munich	Lenerz- de Wilde documentation
Heignkam	Germany	1	EBA	187	Ring	Munich	Lenerz- de Wilde documentation
Heignkam	Germany	1	EBA	166	Ring	Munich	Lenerz- de Wilde documentation
Heignkam	Germany	1	EBA	183	Ring	Munich	Lenerz- de Wilde documentation
Heignkam	Germany	1	EBA	189	Ring	Munich	Lenerz- de Wilde documentation
Heignkam	Germany	1	EBA	178	Ring	Munich	Lenerz- de Wilde documentation
Heignkam	Germany	1	EBA	137	Ring	Munich	Lenerz- de Wilde documentation
Heimhilgen	Germany	1	EBA	202	Ring	Traunstein//Trostberg	Menke 1978/1979
Heimhilgen	Germany	1	EBA	173	Ring	Traunstein//Trostberg	Menke 1978/1979
Heimhilgen	Germany	1	EBA	206	Ring	Traunstein//Trostberg	Menke 1978/1979
Hengensberg-Altenufer	Germany	1	EBA	181	Ring	Deggendorf	Schmotz 1984
Hengensberg-Altenufer	Germany	1	EBA	190	Ring	Deggendorf	Schmotz 1984
Hengensberg-Altenufer	Germany	1	EBA	180	Ring	Deggendorf	Schmotz 1984
Hengensberg-Altenufer	Germany	1	EBA	190	Ring	Deggendorf	Schmotz 1984
Hengensberg-Altenufer	Germany	1	EBA	192	Ring	Deggendorf	Schmotz 1984
Hengensberg-Altenufer	Germany	1	EBA	176	Ring	Deggendorf	Schmotz 1984
Heřmaň	Czech Republic	1	EBA	193	Ring	Prague//Horažďovice//Písek	Lenerz- de Wilde documentation
Heřmaň	Czech Republic	1	EBA	186	Ring	Prague//Horažďovice//Písek	Lenerz- de Wilde documentation
Heřmaň	Czech Republic	1	EBA	191	Ring	Prague//Horažďovice//Písek	Lenerz- de Wilde documentation
Heřmaň	Czech Republic	1	EBA	214	Ring	Prague//Horažďovice//Písek	Lenerz- de Wilde documentation
Heřmaň	Czech Republic	1	EBA	174	Ring	Prague//Horažďovice//Písek	Lenerz- de Wilde documentation
Heřmaň	Czech Republic	1	EBA	183	Ring	Prague//Horažďovice//Písek	Lenerz- de Wilde documentation
Heřmaň	Czech Republic	1	EBA	178	Ring	Prague//Horažďovice//Písek	Lenerz- de Wilde documentation
Heřmaň	Czech Republic	1	EBA	130	Ring	Prague//Horažďovice//Písek	Lenerz- de Wilde documentation
Heřmaň	Czech Republic	1	EBA	154	Ring	Prague//Horažďovice//Písek	Lenerz- de Wilde documentation
Heřmaň	Czech Republic	1	EBA	158	Ring	Prague//Horažďovice//Písek	Lenerz- de Wilde documentation
Heřmaň	Czech Republic	1	EBA	189	Ring	Prague//Horažďovice//Písek	Lenerz- de Wilde documentation
Heřmaň	Czech Republic	1	EBA	195	Ring	Prague//Horažďovice//Písek	Lenerz- de Wilde documentation
Heřmaň	Czech Republic	1	EBA	195	Ring	Prague//Horažďovice//Písek	Lenerz- de Wilde documentation
Heřmaň	Czech Republic	1	EBA	159	Ring	Prague//Horažďovice//Písek	Lenerz- de Wilde documentation
Heřmaň	Czech Republic	1	EBA	189	Ring	Prague//Horažďovice//Písek	Lenerz- de Wilde documentation
Heřmaň	Czech Republic	1	EBA	205	Ring	Prague//Horažďovice//Písek	Lenerz- de Wilde documentation
Heřmaň	Czech Republic	1	EBA	185	Ring	Prague//Horažďovice//Písek	Lenerz- de Wilde documentation
Heřmaň	Czech Republic	1	EBA	215	Ring	Prague//Horažďovice//Písek	Lenerz- de Wilde documentation
Heřmaň	Czech Republic	1	EBA	181	Ring	Prague//Horažďovice//Písek	Lenerz- de Wilde documentation
Heřmaň	Czech Republic	1	EBA	183	Ring	Prague//Horažďovice//Písek	Lenerz- de Wilde documentation
Heřmaň	Czech Republic	1	EBA	196	Ring	Prague//Horažďovice//Písek	Lenerz- de Wilde documentation
Heřmaň	Czech Republic	1	EBA	171	Ring	Prague//Horažďovice//Písek	Lenerz- de Wilde documentation
Heřmaň	Czech Republic	1	EBA	217	Ring	Prague//Horažďovice//Písek	Lenerz- de Wilde documentation
Hospozín	Czech Republic	1	EBA	201	Ring	Prague	Lenerz- de Wilde documentation
Hospozín	Czech Republic	1	EBA	202	Ring	Prague	Lenerz- de Wilde documentation
Hospozín	Czech Republic	1	EBA	196	Ring	Prague	Lenerz- de Wilde documentation
Hospozín	Czech Republic	1	EBA	200	Ring	Prague	Lenerz- de Wilde documentation
Hospozín	Czech Republic	1	EBA	203	Ring	Prague	Lenerz- de Wilde documentation
Hospozín	Czech Republic	1	EBA	198	Ring	Prague	Lenerz- de Wilde documentation
Hospozín	Czech Republic	1	EBA	200	Ring	Prague	Lenerz- de Wilde documentation
Hospozín	Czech Republic	1	EBA	203	Ring	Prague	Lenerz- de Wilde documentation
Hospozín	Czech Republic	1	EBA	29	Ring	Prague	Lenerz- de Wilde documentation
Hospozín	Czech Republic	1	EBA	192	Ring	Prague	Lenerz- de Wilde documentation
Hospozín	Czech Republic	1	EBA	203	Ring	Prague	Lenerz- de Wilde documentation
Hospozín	Czech Republic	1	EBA	207	Ring	Prague	Lenerz- de Wilde documentation
Hospozín	Czech Republic	1	EBA	201	Ring	Prague	Lenerz- de Wilde documentation
Hospozín	Czech Republic	1	EBA	206	Ring	Prague	Lenerz- de Wilde documentation
Hospozín	Czech Republic	1	EBA	202	Ring	Prague	Lenerz- de Wilde documentation
Hospozín	Czech Republic	1	EBA	212	Ring	Prague	Lenerz- de Wilde documentation
Hospozín	Czech Republic	1	EBA	209	Ring	Prague	Lenerz- de Wilde documentation
Hospozín	Czech Republic	1	EBA	188	Ring	Prague	Lenerz- de Wilde documentation
Hospozín	Czech Republic	1	EBA	187	Ring	Prague	Lenerz- de Wilde documentation
Ittling	Germany	1	EBA	121	Ring	Straubing	Lenerz- de Wilde documentation
Ittling	Germany	1	EBA	146	Ring	Straubing	Lenerz- de Wilde documentation
Ittling	Germany	1	EBA	119	Ring	Straubing	Lenerz- de Wilde documentation
Ittling	Germany	1	EBA	157	Ring	Straubing	Lenerz- de Wilde documentation
Ittling	Germany	1	EBA	117	Ring	Straubing	Lenerz- de Wilde documentation
Ittling	Germany	1	EBA	149	Ring	Straubing	Lenerz- de Wilde documentation
Ittling	Germany	1	EBA	142	Ring	Straubing	Lenerz- de Wilde documentation
Ittling	Germany	1	EBA	117	Ring	Straubing	Lenerz- de Wilde documentation
Ittling	Germany	1	EBA	127	Ring	Straubing	Lenerz- de Wilde documentation
Ittling	Germany	1	EBA	135	Ring	Straubing	Lenerz- de Wilde documentation
Jaroslavice	Czech Republic	1	EBA	188	Ring	České Budějovice	Lenerz- de Wilde documentation
Jaroslavice	Czech Republic	1	EBA	185	Ring	České Budějovice	Lenerz- de Wilde documentation
Jaroslavice	Czech Republic	1	EBA	211	Ring	České Budějovice	Lenerz- de Wilde documentation
Jaroslavice	Czech Republic	1	EBA	177	Ring	České Budějovice	Lenerz- de Wilde documentation
Jaroslavice	Czech Republic	1	EBA	204	Ring	České Budějovice	Lenerz- de Wilde documentation
Jaroslavice	Czech Republic	1	EBA	207	Ring	České Budějovice	Lenerz- de Wilde documentation
Jaroslavice	Czech Republic	1	EBA	202	Ring	České Budějovice	Lenerz- de Wilde documentation
Jaroslavice	Czech Republic	1	EBA	174	Ring	České Budějovice	Lenerz- de Wilde documentation
Jaroslavice	Czech Republic	1	EBA	226	Ring	České Budějovice	Lenerz- de Wilde documentation
Jaroslavice	Czech Republic	1	EBA	198	Ring	České Budějovice	Lenerz- de Wilde documentation
Jičiněves	Czech Republic	1	EBA	129	Ring	Prague//Prague 2	Lenerz- de Wilde documentation
Jičiněves	Czech Republic	1	EBA	184	Ring	Prague//Prague 2	Lenerz- de Wilde documentation
Jičiněves	Czech Republic	1	EBA	162	Ring	Prague//Prague 2	Lenerz- de Wilde documentation
Jičiněves	Czech Republic	1	EBA	173	Ring	Prague//Prague 2	Lenerz- de Wilde documentation
Jičiněves	Czech Republic	1	EBA	72	Ring	Prague//Prague 2	Lenerz- de Wilde documentation
Jiřikovice	Czech Republic	1	EBA	105	Ring	Brno	Lenerz- de Wilde documentation
Jiřikovice	Czech Republic	1	EBA	205	Ring	Brno	Lenerz- de Wilde documentation
Jiřikovice	Czech Republic	1	EBA	185	Ring	Brno	Lenerz- de Wilde documentation
Jiřikovice	Czech Republic	1	EBA	205	Ring	Brno	Lenerz- de Wilde documentation
Jiřikovice	Czech Republic	1	EBA	195	Ring	Brno	Lenerz- de Wilde documentation
Kaufering	Germany	1	EBA	54	Ring	Munich	Lenerz- de Wilde documentation
Kaufering	Germany	1	EBA	44	Ring	Munich	Lenerz- de Wilde documentation
Kaufering	Germany	1	EBA	49	Ring	Munich	Lenerz- de Wilde documentation
Kaufering	Germany	1	EBA	44	Ring	Munich	Lenerz- de Wilde documentation
Kaufering	Germany	1	EBA	54	Ring	Munich	Lenerz- de Wilde documentation
Kaufering	Germany	1	EBA	63	Ring	Munich	Lenerz- de Wilde documentation
Kaufering	Germany	1	EBA	51	Ring	Munich	Lenerz- de Wilde documentation
Kilb	Austria	1	EBA	199	Ring	Asparn	Lauermann and Pernicka 2013; Lenerz- de Wilde documentation
Kilb	Austria	1	EBA	203	Ring	Asparn	Lauermann and Pernicka 2013; Lenerz- de Wilde documentation
Kilb	Austria	1	EBA	188	Ring	Asparn	Lauermann and Pernicka 2013; Lenerz- de Wilde documentation
Kilb	Austria	1	EBA	201	Ring	Asparn	Lauermann and Pernicka 2013; Lenerz- de Wilde documentation
Kilb	Austria	1	EBA	194	Ring	Asparn	Lauermann and Pernicka 2013; Lenerz- de Wilde documentation
Kilb	Austria	1	EBA	203	Ring	Asparn	Lauermann and Pernicka 2013; Lenerz- de Wilde documentation
Kilb	Austria	1	EBA	203	Ring	Asparn	Lauermann and Pernicka 2013; Lenerz- de Wilde documentation
Kilb	Austria	1	EBA	204	Ring	Asparn	Lauermann and Pernicka 2013; Lenerz- de Wilde documentation
Kilb	Austria	1	EBA	208	Ring	Asparn	Lauermann and Pernicka 2013; Lenerz- de Wilde documentation
Kilb	Austria	1	EBA	199	Ring	Asparn	Lauermann and Pernicka 2013; Lenerz- de Wilde documentation
Kilb	Austria	1	EBA	197	Ring	Asparn	Lauermann and Pernicka 2013; Lenerz- de Wilde documentation
Kilb	Austria	1	EBA	202	Ring	Asparn	Lauermann and Pernicka 2013; Lenerz- de Wilde documentation
Kilb	Austria	1	EBA	198	Ring	Asparn	Lauermann and Pernicka 2013; Lenerz- de Wilde documentation
Kilb	Austria	1	EBA	183	Ring	Asparn	Lauermann and Pernicka 2013; Lenerz- de Wilde documentation
Kilb	Austria	1	EBA	206	Ring	Asparn	Lauermann and Pernicka 2013; Lenerz- de Wilde documentation
Kilb	Austria	1	EBA	193	Ring	Asparn	Lauermann and Pernicka 2013; Lenerz- de Wilde documentation
Kilb	Austria	1	EBA	207	Ring	Asparn	Lauermann and Pernicka 2013; Lenerz- de Wilde documentation
Kilb	Austria	1	EBA	184	Ring	Asparn	Lauermann and Pernicka 2013; Lenerz- de Wilde documentation
Kilb	Austria	1	EBA	198	Ring	Asparn	Lauermann and Pernicka 2013; Lenerz- de Wilde documentation
Kilb	Austria	1	EBA	201	Ring	Asparn	Lauermann and Pernicka 2013; Lenerz- de Wilde documentation
Kilb	Austria	1	EBA	232	Ring	Asparn	Lauermann and Pernicka 2013; Lenerz- de Wilde documentation
Kilb	Austria	1	EBA	201	Ring	Asparn	Lauermann and Pernicka 2013; Lenerz- de Wilde documentation
Kilb	Austria	1	EBA	196	Ring	Asparn	Lauermann and Pernicka 2013; Lenerz- de Wilde documentation
Kilb	Austria	1	EBA	227	Ring	Asparn	Lauermann and Pernicka 2013; Lenerz- de Wilde documentation
Kilb	Austria	1	EBA	203	Ring	Asparn	Lauermann and Pernicka 2013; Lenerz- de Wilde documentation
Kilb	Austria	1	EBA	200	Ring	Asparn	Lauermann and Pernicka 2013; Lenerz- de Wilde documentation
Kilb	Austria	1	EBA	191	Ring	Asparn	Lauermann and Pernicka 2013; Lenerz- de Wilde documentation
Kilb	Austria	1	EBA	176	Ring	Asparn	Lauermann and Pernicka 2013; Lenerz- de Wilde documentation
Kilb	Austria	1	EBA	219	Ring	Asparn	Lauermann and Pernicka 2013; Lenerz- de Wilde documentation
Kilb	Austria	1	EBA	216	Ring	Asparn	Lauermann and Pernicka 2013; Lenerz- de Wilde documentation
Kilb	Austria	1	EBA	192	Ring	Asparn	Lauermann and Pernicka 2013; Lenerz- de Wilde documentation
Kilb	Austria	1	EBA	201	Ring	Asparn	Lauermann and Pernicka 2013; Lenerz- de Wilde documentation
Kilb	Austria	1	EBA	222	Ring	Asparn	Lauermann and Pernicka 2013; Lenerz- de Wilde documentation
Kilb	Austria	1	EBA	202	Ring	Asparn	Lauermann and Pernicka 2013; Lenerz- de Wilde documentation
Kilb	Austria	1	EBA	179	Ring	Asparn	Lauermann and Pernicka 2013; Lenerz- de Wilde documentation
Kilb	Austria	1	EBA	207	Ring	Asparn	Lauermann and Pernicka 2013; Lenerz- de Wilde documentation
Kilb	Austria	1	EBA	205	Ring	Asparn	Lauermann and Pernicka 2013; Lenerz- de Wilde documentation
Kilb	Austria	1	EBA	225	Ring	Asparn	Lauermann and Pernicka 2013; Lenerz- de Wilde documentation
Kilb	Austria	1	EBA	205	Ring	Asparn	Lauermann and Pernicka 2013; Lenerz- de Wilde documentation
Kilb	Austria	1	EBA	174	Ring	Asparn	Lauermann and Pernicka 2013; Lenerz- de Wilde documentation
Kilb	Austria	1	EBA	216	Ring	Asparn	Lauermann and Pernicka 2013; Lenerz- de Wilde documentation
Kilb	Austria	1	EBA	203	Ring	Asparn	Lauermann and Pernicka 2013; Lenerz- de Wilde documentation
Kilb	Austria	1	EBA	203	Ring	Asparn	Lauermann and Pernicka 2013; Lenerz- de Wilde documentation
Kilb	Austria	1	EBA	197	Ring	Asparn	Lauermann and Pernicka 2013; Lenerz- de Wilde documentation
Kilb	Austria	1	EBA	203	Ring	Asparn	Lauermann and Pernicka 2013; Lenerz- de Wilde documentation
Kilb	Austria	1	EBA	230	Ring	Asparn	Lauermann and Pernicka 2013; Lenerz- de Wilde documentation
Kilb	Austria	1	EBA	162	Ring	Asparn	Lauermann and Pernicka 2013; Lenerz- de Wilde documentation
Kilb	Austria	1	EBA	197	Ring	Asparn	Lauermann and Pernicka 2013; Lenerz- de Wilde documentation
Kilb	Austria	1	EBA	137	Ring	Asparn	Lauermann and Pernicka 2013; Lenerz- de Wilde documentation
Kilb	Austria	1	EBA	238	Ring	Asparn	Lauermann and Pernicka 2013; Lenerz- de Wilde documentation
Kilb	Austria	1	EBA	201	Ring	Asparn	Lauermann and Pernicka 2013; Lenerz- de Wilde documentation
Kilb	Austria	1	EBA	205	Ring	Asparn	Lauermann and Pernicka 2013; Lenerz- de Wilde documentation
Kilb	Austria	1	EBA	214	Ring	Asparn	Lauermann and Pernicka 2013; Lenerz- de Wilde documentation
Kilb	Austria	1	EBA	202	Ring	Asparn	Lauermann and Pernicka 2013; Lenerz- de Wilde documentation
Kilb	Austria	1	EBA	203	Ring	Asparn	Lauermann and Pernicka 2013; Lenerz- de Wilde documentation
Klein-Pöchlarn	Austria	1	EBA	148	Ring	Vienna	Lenerz- de Wilde documentation
Klein-Pöchlarn	Austria	1	EBA	194	Ring	Vienna	Lenerz- de Wilde documentation
Klein-Pöchlarn	Austria	1	EBA	180	Ring	Vienna	Lenerz- de Wilde documentation
Klein-Pöchlarn	Austria	1	EBA	211	Ring	Vienna	Lenerz- de Wilde documentation
Klein-Pöchlarn	Austria	1	EBA	165	Ring	Vienna	Lenerz- de Wilde documentation
Klein-Pöchlarn	Austria	1	EBA	215	Ring	Vienna	Lenerz- de Wilde documentation
Klein-Pöchlarn	Austria	1	EBA	207	Ring	Vienna	Lenerz- de Wilde documentation
Klein-Pöchlarn	Austria	1	EBA	182	Ring	Vienna	Lenerz- de Wilde documentation
Klein-Pöchlarn	Austria	1	EBA	167	Ring	Vienna	Lenerz- de Wilde documentation
Kleinschweibarth (Drasenhofen)	Austria	1	EBA	204	Ring	Asparn	Lenerz- de Wilde documentation
Kleinschweibarth (Drasenhofen)	Austria	1	EBA	206	Ring	Asparn	Lenerz- de Wilde documentation
Kleinschweibarth (Drasenhofen)	Austria	1	EBA	207	Ring	Asparn	Lenerz- de Wilde documentation
Kleinschweibarth (Drasenhofen)	Austria	1	EBA	201	Ring	Asparn	Lenerz- de Wilde documentation
Kleinschweibarth (Drasenhofen)	Austria	1	EBA	212	Ring	Asparn	Lenerz- de Wilde documentation
Kleinschweibarth (Drasenhofen)	Austria	1	EBA	211	Ring	Asparn	Lenerz- de Wilde documentation
Kobylí	Czech Republic	1	EBA	207	Ring	Brno	Lenerz- de Wilde documentation
Kobylí	Czech Republic	1	EBA	196	Ring	Brno	Lenerz- de Wilde documentation
Kobylí	Czech Republic	1	EBA	200	Ring	Brno	Lenerz- de Wilde documentation
Kobylí	Czech Republic	1	EBA	199	Ring	Brno	Lenerz- de Wilde documentation
Kobylí	Czech Republic	1	EBA	208	Ring	Brno	Lenerz- de Wilde documentation
Kobylí	Czech Republic	1	EBA	198	Ring	Brno	Lenerz- de Wilde documentation
Kobylí	Czech Republic	1	EBA	205	Ring	Brno	Lenerz- de Wilde documentation
Kobylí	Czech Republic	1	EBA	188	Ring	Brno	Lenerz- de Wilde documentation
Kobylí	Czech Republic	1	EBA	205	Ring	Brno	Lenerz- de Wilde documentation
Kobylí	Czech Republic	1	EBA	252	Ring	Brno	Lenerz- de Wilde documentation
Kobylí	Czech Republic	1	EBA	212	Ring	Brno	Lenerz- de Wilde documentation
Kobylí	Czech Republic	1	EBA	210	Ring	Brno	Lenerz- de Wilde documentation
Kobylí	Czech Republic	1	EBA	210	Ring	Brno	Lenerz- de Wilde documentation
Kobylí	Czech Republic	1	EBA	202	Ring	Brno	Lenerz- de Wilde documentation
Kobylí	Czech Republic	1	EBA	195	Ring	Brno	Lenerz- de Wilde documentation
Kobylí	Czech Republic	1	EBA	186	Ring	Brno	Lenerz- de Wilde documentation
Kobylí	Czech Republic	1	EBA	202	Ring	Brno	Lenerz- de Wilde documentation
Kobylí	Czech Republic	1	EBA	206	Ring	Brno	Lenerz- de Wilde documentation
Kobylí	Czech Republic	1	EBA	195	Ring	Brno	Lenerz- de Wilde documentation
Kolín	Czech Republic	1	EBA	212	Ring	Berlin Ethn.//Kalinigrad//Dobruška	Moucha 2005
Kolín	Czech Republic	1	EBA	194	Ring	Berlin Ethn.//Kalinigrad//Dobruška	Moucha 2005
Kolín	Czech Republic	1	EBA	214	Ring	Berlin Ethn.//Kalinigrad//Dobruška	Moucha 2005
Kolín	Czech Republic	1	EBA	211	Ring	Berlin Ethn.//Kalinigrad//Dobruška	Moucha 2005
Kolín	Czech Republic	1	EBA	204	Ring	Berlin Ethn.//Kalinigrad//Dobruška	Moucha 2005
Kolín	Czech Republic	1	EBA	192	Rib	Berlin Ethn.//Kalinigrad//Dobruška	Moucha 2005
Köschinger Forst	Germany	1	EBA	72	Rib	Private Property	Lenerz- de Wilde documentation
Köschinger Forst	Germany	1	EBA	90	Rib	Private Property	Lenerz- de Wilde documentation
Köschinger Forst	Germany	1	EBA	86	Rib	Private Property	Lenerz- de Wilde documentation
Köschinger Forst	Germany	1	EBA	89	Rib	Private Property	Lenerz- de Wilde documentation
Köschinger Forst	Germany	1	EBA	87	Rib	Private Property	Lenerz- de Wilde documentation
Köschinger Forst	Germany	1	EBA	82	Rib	Private Property	Lenerz- de Wilde documentation
Köschinger Forst	Germany	1	EBA	79	Rib	Private Property	Lenerz- de Wilde documentation
Köschinger Forst	Germany	1	EBA	70	Rib	Private Property	Lenerz- de Wilde documentation
Köschinger Forst	Germany	1	EBA	73	Rib	Private Property	Lenerz- de Wilde documentation
Köschinger Forst	Germany	1	EBA	94	Rib	Private Property	Lenerz- de Wilde documentation
Köschinger Forst	Germany	1	EBA	78	Rib	Private Property	Lenerz- de Wilde documentation
Köschinger Forst	Germany	1	EBA	71	Rib	Private Property	Lenerz- de Wilde documentation
Köschinger Forst	Germany	1	EBA	81	Rib	Private Property	Lenerz- de Wilde documentation
Köschinger Forst	Germany	1	EBA	77	Rib	Private Property	Lenerz- de Wilde documentation
Köschinger Forst	Germany	1	EBA	75	Rib	Private Property	Lenerz- de Wilde documentation
Köschinger Forst	Germany	1	EBA	90	Rib	Private Property	Lenerz- de Wilde documentation
Köschinger Forst	Germany	1	EBA	64	Rib	Private Property	Lenerz- de Wilde documentation
Köschinger Forst	Germany	1	EBA	78	Rib	Private Property	Lenerz- de Wilde documentation
Köschinger Forst	Germany	1	EBA	87	Rib	Private Property	Lenerz- de Wilde documentation
Kosov	Czech Republic	1	EBA	229	Ring	České Budějovice	Lenerz- de Wilde documentation
Kosov	Czech Republic	1	EBA	332	Ring	České Budějovice	Lenerz- de Wilde documentation
Kosov	Czech Republic	1	EBA	139	Ring	České Budějovice	Lenerz- de Wilde documentation
Kosov	Czech Republic	1	EBA	279	Ring	České Budějovice	Lenerz- de Wilde documentation
Kosov	Czech Republic	1	EBA	446	Ring	České Budějovice	Lenerz- de Wilde documentation
Kostice	Czech Republic	1	EBA	207	Ring	Brno	Lenerz- de Wilde documentation
Kostice	Czech Republic	1	EBA	178	Ring	Brno	Lenerz- de Wilde documentation
Kostice	Czech Republic	1	EBA	163	Ring	Brno	Lenerz- de Wilde documentation
Kostice	Czech Republic	1	EBA	191	Ring	Brno	Lenerz- de Wilde documentation
Kostice	Czech Republic	1	EBA	197	Ring	Brno	Lenerz- de Wilde documentation
Kostice	Czech Republic	1	EBA	195	Ring	Brno	Lenerz- de Wilde documentation
Kostice	Czech Republic	1	EBA	203	Ring	Brno	Lenerz- de Wilde documentation
Kostice	Czech Republic	1	EBA	192	Ring	Brno	Lenerz- de Wilde documentation
Kostice	Czech Republic	1	EBA	176	Ring	Brno	Lenerz- de Wilde documentation
Kostice	Czech Republic	1	EBA	191	Ring	Brno	Lenerz- de Wilde documentation
Kostice	Czech Republic	1	EBA	197	Ring	Brno	Lenerz- de Wilde documentation
Kostice	Czech Republic	1	EBA	223	Ring	Brno	Lenerz- de Wilde documentation
Kostice	Czech Republic	1	EBA	182	Ring	Brno	Lenerz- de Wilde documentation
Kostice	Czech Republic	1	EBA	218	Ring	Brno	Lenerz- de Wilde documentation
Kostice	Czech Republic	1	EBA	217	Ring	Brno	Lenerz- de Wilde documentation
Kostice	Czech Republic	1	EBA	166	Ring	Brno	Lenerz- de Wilde documentation
Kostice	Czech Republic	1	EBA	208	Ring	Brno	Lenerz- de Wilde documentation
Kostice	Czech Republic	1	EBA	189	Ring	Brno	Lenerz- de Wilde documentation
Kostice	Czech Republic	1	EBA	184	Ring	Brno	Lenerz- de Wilde documentation
Kostice	Czech Republic	1	EBA	196	Ring	Brno	Lenerz- de Wilde documentation
Kostice	Czech Republic	1	EBA	194	Ring	Brno	Lenerz- de Wilde documentation
Kostice	Czech Republic	1	EBA	191	Ring	Brno	Lenerz- de Wilde documentation
Kostice	Czech Republic	1	EBA	156	Ring	Brno	Lenerz- de Wilde documentation
Kostice	Czech Republic	1	EBA	222	Ring	Brno	Lenerz- de Wilde documentation
Kostice	Czech Republic	1	EBA	194	Ring	Brno	Lenerz- de Wilde documentation
Kostice	Czech Republic	1	EBA	204	Ring	Brno	Lenerz- de Wilde documentation
Kostice	Czech Republic	1	EBA	193	Ring	Brno	Lenerz- de Wilde documentation
Kostice	Czech Republic	1	EBA	198	Ring	Brno	Lenerz- de Wilde documentation
Kostice	Czech Republic	1	EBA	207	Ring	Brno	Lenerz- de Wilde documentation
Kostice	Czech Republic	1	EBA	175	Ring	Brno	Lenerz- de Wilde documentation
Kostice	Czech Republic	1	EBA	204	Ring	Brno	Lenerz- de Wilde documentation
Kostice	Czech Republic	1	EBA	213	Ring	Brno	Lenerz- de Wilde documentation
Kottgeisering	Germany	1	EBA	774	Ring	Munich	Lenerz- de Wilde documentation
Kottgeisering	Germany	1	EBA	448	Ring	Munich	Lenerz- de Wilde documentation
Kottgeisering	Germany	1	EBA	552	Ring	Munich	Lenerz- de Wilde documentation
Kottgeisering	Germany	1	EBA	671	Ring	Munich	Lenerz- de Wilde documentation
Krtely	Czech Republic	1	EBA	167	Ring	Prague	Moucha 2005
Krumbach	Germany	1	EBA	89	Rib	Munich//Nuremberg	Lenerz- de Wilde documentation
Krumbach	Germany	1	EBA	68	Rib	Munich//Nuremberg	Lenerz- de Wilde documentation
Krumbach	Germany	1	EBA	77	Rib	Munich//Nuremberg	Lenerz- de Wilde documentation
Krumbach	Germany	1	EBA	107	Rib	Munich//Nuremberg	Lenerz- de Wilde documentation
Krumbach	Germany	1	EBA	77	Rib	Munich//Nuremberg	Lenerz- de Wilde documentation
Krumbach	Germany	1	EBA	81	Rib	Munich//Nuremberg	Lenerz- de Wilde documentation
Krumbach	Germany	1	EBA	82	Rib	Munich//Nuremberg	Lenerz- de Wilde documentation
Krumbach	Germany	1	EBA	85	Rib	Munich//Nuremberg	Lenerz- de Wilde documentation
Krumbach	Germany	1	EBA	85	Rib	Munich//Nuremberg	Lenerz- de Wilde documentation
Krumbach	Germany	1	EBA	87	Rib	Munich//Nuremberg	Lenerz- de Wilde documentation
Krumbach	Germany	1	EBA	89	Rib	Munich//Nuremberg	Lenerz- de Wilde documentation
Krumbach	Germany	1	EBA	90	Rib	Munich//Nuremberg	Lenerz- de Wilde documentation
Krumbach	Germany	1	EBA	91	Rib	Munich//Nuremberg	Lenerz- de Wilde documentation
Krumbach	Germany	1	EBA	83	Rib	Munich//Nuremberg	Lenerz- de Wilde documentation
Krumbach	Germany	1	EBA	87	Rib	Munich//Nuremberg	Lenerz- de Wilde documentation
Krumbach	Germany	1	EBA	88	Rib	Munich//Nuremberg	Lenerz- de Wilde documentation
Krumbach	Germany	1	EBA	89	Rib	Munich//Nuremberg	Lenerz- de Wilde documentation
Krumbach	Germany	1	EBA	91	Rib	Munich//Nuremberg	Lenerz- de Wilde documentation
Krumbach	Germany	1	EBA	94	Rib	Munich//Nuremberg	Lenerz- de Wilde documentation
Krumbach	Germany	1	EBA	94	Rib	Munich//Nuremberg	Lenerz- de Wilde documentation
Krumbach	Germany	1	EBA	102	Rib	Munich//Nuremberg	Lenerz- de Wilde documentation
Krumbach	Germany	1	EBA	109	Rib	Munich//Nuremberg	Lenerz- de Wilde documentation
Krumbach	Germany	1	EBA	96	Rib	Munich//Nuremberg	Lenerz- de Wilde documentation
Krumbach	Germany	1	EBA	85	Rib	Munich//Nuremberg	Lenerz- de Wilde documentation
Krumbach	Germany	1	EBA	107	Rib	Munich//Nuremberg	Lenerz- de Wilde documentation
Krumbach	Germany	1	EBA	86	Rib	Munich//Nuremberg	Lenerz- de Wilde documentation
Krumbach	Germany	1	EBA	75	Rib	Munich//Nuremberg	Lenerz- de Wilde documentation
Krumbach	Germany	1	EBA	75	Rib	Munich//Nuremberg	Lenerz- de Wilde documentation
Krumbach	Germany	1	EBA	82	Rib	Munich//Nuremberg	Lenerz- de Wilde documentation
Krumbach	Germany	1	EBA	101	Rib	Munich//Nuremberg	Lenerz- de Wilde documentation
Krumbach	Germany	1	EBA	104	Rib	Munich//Nuremberg	Lenerz- de Wilde documentation
Krumbach	Germany	1	EBA	75	Rib	Munich//Nuremberg	Lenerz- de Wilde documentation
Krumbach	Germany	1	EBA	66	Rib	Munich//Nuremberg	Lenerz- de Wilde documentation
Krumbach	Germany	1	EBA	111	Rib	Munich//Nuremberg	Lenerz- de Wilde documentation
Krumbach	Germany	1	EBA	74	Rib	Munich//Nuremberg	Lenerz- de Wilde documentation
Krumbach	Germany	1	EBA	67	Rib	Munich//Nuremberg	Lenerz- de Wilde documentation
Krumbach	Germany	1	EBA	76	Rib	Munich//Nuremberg	Lenerz- de Wilde documentation
Krumbach	Germany	1	EBA	66	Rib	Munich//Nuremberg	Lenerz- de Wilde documentation
Krumbach	Germany	1	EBA	69	Rib	Munich//Nuremberg	Lenerz- de Wilde documentation
Krumbach	Germany	1	EBA	69	Rib	Munich//Nuremberg	Lenerz- de Wilde documentation
Krumbach	Germany	1	EBA	72	Rib	Munich//Nuremberg	Lenerz- de Wilde documentation
Krumbach	Germany	1	EBA	72	Rib	Munich//Nuremberg	Lenerz- de Wilde documentation
Krumbach	Germany	1	EBA	73	Rib	Munich//Nuremberg	Lenerz- de Wilde documentation
Krumbach	Germany	1	EBA	74	Rib	Munich//Nuremberg	Lenerz- de Wilde documentation
Krumbach	Germany	1	EBA	75	Rib	Munich//Nuremberg	Lenerz- de Wilde documentation
Krumbach	Germany	1	EBA	84	Rib	Munich//Nuremberg	Lenerz- de Wilde documentation
Krumbach	Germany	1	EBA	75	Rib	Munich//Nuremberg	Lenerz- de Wilde documentation
Krumbach	Germany	1	EBA	64	Rib	Munich//Nuremberg	Lenerz- de Wilde documentation
Krumbach	Germany	1	EBA	76	Rib	Munich//Nuremberg	Lenerz- de Wilde documentation
Krumbach	Germany	1	EBA	79	Rib	Munich//Nuremberg	Lenerz- de Wilde documentation
Krumbach	Germany	1	EBA	79	Rib	Munich//Nuremberg	Lenerz- de Wilde documentation
Krumbach	Germany	1	EBA	80	Rib	Munich//Nuremberg	Lenerz- de Wilde documentation
Krumbach	Germany	1	EBA	80	Rib	Munich//Nuremberg	Lenerz- de Wilde documentation
Krumbach	Germany	1	EBA	82	Rib	Munich//Nuremberg	Lenerz- de Wilde documentation
Krumbach	Germany	1	EBA	83	Rib	Munich//Nuremberg	Lenerz- de Wilde documentation
Krumbach	Germany	1	EBA	83	Rib	Munich//Nuremberg	Lenerz- de Wilde documentation
Krumbach	Germany	1	EBA	84	Rib	Munich//Nuremberg	Lenerz- de Wilde documentation
Krumbach	Germany	1	EBA	92	Rib	Munich//Nuremberg	Lenerz- de Wilde documentation
Langesöd	Germany	1	EBA	181	Ring	Munich	Menke 1978/1979
Langesöd	Germany	1	EBA	181	Ring	Munich	Menke 1978/1979
Langesöd	Germany	1	EBA	196	Ring	Munich	Menke 1978/1979
Langesöd	Germany	1	EBA	187	Ring	Munich	Menke 1978/1979
Leithen bei Weng	Austria	1	EBA	158	Ring	Linz	Lenerz- de Wilde documentation
Leithen bei Weng	Austria	1	EBA	198	Ring	Linz	Lenerz- de Wilde documentation
Leithen bei Weng	Austria	1	EBA	166	Ring	Linz	Lenerz- de Wilde documentation
Leithen bei Weng	Austria	1	EBA	174	Ring	Linz	Lenerz- de Wilde documentation
Leithen bei Weng	Austria	1	EBA	158	Ring	Linz	Lenerz- de Wilde documentation
Lengfelden	Austria	1	EBA	206	Ring	Salzburg	Lenerz- de Wilde documentation
Lengfelden	Austria	1	EBA	210	Ring	Salzburg	Lenerz- de Wilde documentation
Lengfelden	Austria	1	EBA	185	Ring	Salzburg	Lenerz- de Wilde documentation
Lengfelden	Austria	1	EBA	218	Ring	Salzburg	Lenerz- de Wilde documentation
Lengfelden	Austria	1	EBA	220	Ring	Salzburg	Lenerz- de Wilde documentation
Lesonice	Czech Republic	1	EBA	199	Ring	Vienna	Lenerz- de Wilde documentation
Lesonice	Czech Republic	1	EBA	188	Ring	Vienna	Lenerz- de Wilde documentation
Lesonice	Czech Republic	1	EBA	213	Ring	Vienna	Lenerz- de Wilde documentation
Lesonice	Czech Republic	1	EBA	201	Ring	Vienna	Lenerz- de Wilde documentation
Lesonice	Czech Republic	1	EBA	216	Ring	Vienna	Lenerz- de Wilde documentation
Lesonice	Czech Republic	1	EBA	196	Ring	Vienna	Lenerz- de Wilde documentation
Lesonice	Czech Republic	1	EBA	202	Ring	Vienna	Lenerz- de Wilde documentation
Lesonice	Czech Republic	1	EBA	199	Ring	Vienna	Lenerz- de Wilde documentation
Lesonice	Czech Republic	1	EBA	208	Ring	Vienna	Lenerz- de Wilde documentation
Lesonice	Czech Republic	1	EBA	206	Ring	Vienna	Lenerz- de Wilde documentation
Lesonice	Czech Republic	1	EBA	195	Ring	Vienna	Lenerz- de Wilde documentation
Litoměřice	Czech Republic	1	EBA	101	Rib	Most	Moucha 2005
Litoměřice	Czech Republic	1	EBA	109	Rib	Most	Moucha 2005
Litoměřice	Czech Republic	1	EBA	109	Rib	Most	Moucha 2005
Lochen	Austria	1	EBA	158	Ring	Vienna	Lenerz- de Wilde documentation
Lochen	Austria	1	EBA	171	Ring	Vienna	Lenerz- de Wilde documentation
Lochen	Austria	1	EBA	168	Ring	Vienna	Lenerz- de Wilde documentation
Lochen	Austria	1	EBA	191	Ring	Vienna	Lenerz- de Wilde documentation
Lochen	Austria	1	EBA	201	Ring	Vienna	Lenerz- de Wilde documentation
Lukavec (okres Litoměřice)	Czech Republic	1	EBA	195	Ring	Litoměřice	Moucha 2005
Lukavec (okres Litoměřice)	Czech Republic	1	EBA	212	Ring	Litoměřice	Moucha 2005
Lukavec (okres Litoměřice)	Czech Republic	1	EBA	204	Ring	Litoměřice	Moucha 2005
Lukavec (okres Litoměřice)	Czech Republic	1	EBA	204	Ring	Litoměřice	Moucha 2005
Lukavec (okres Litoměřice)	Czech Republic	1	EBA	199	Ring	Litoměřice	Moucha 2005
Lukavec (okres Litoměřice)	Czech Republic	1	EBA	200	Ring	Litoměřice	Moucha 2005
Lukavec (okres Litoměřice)	Czech Republic	1	EBA	187	Ring	Litoměřice	Moucha 2005
Lukavec (okres Litoměřice)	Czech Republic	1	EBA	177	Ring	Litoměřice	Moucha 2005
Lukavec (okres Litoměřice)	Czech Republic	1	EBA	198	Ring	Litoměřice	Moucha 2005
Lukavec (okres Litoměřice)	Czech Republic	1	EBA	156	Ring	Litoměřice	Moucha 2005
Lukavec (okres Litoměřice)	Czech Republic	1	EBA	208	Ring	Litoměřice	Moucha 2005
Lukavec (okres Litoměřice)	Czech Republic	1	EBA	199	Ring	Litoměřice	Moucha 2005
Lukavec (okres Litoměřice)	Czech Republic	1	EBA	192	Ring	Litoměřice	Moucha 2005
Lukavec (okres Litoměřice)	Czech Republic	1	EBA	198	Ring	Litoměřice	Moucha 2005
Lukavec (okres Litoměřice)	Czech Republic	1	EBA	193	Ring	Litoměřice	Moucha 2005
Lukavec (okres Litoměřice)	Czech Republic	1	EBA	146	Ring	Litoměřice	Moucha 2005
Lukavec (okres Litoměřice)	Czech Republic	1	EBA	187	Ring	Litoměřice	Moucha 2005
Lukavec (okres Litoměřice)	Czech Republic	1	EBA	195	Ring	Litoměřice	Moucha 2005
Lukavec (okres Litoměřice)	Czech Republic	1	EBA	196	Ring	Litoměřice	Moucha 2005
Lukavec (okres Litoměřice)	Czech Republic	1	EBA	179	Ring	Litoměřice	Moucha 2005
Lukavec (okres Litoměřice)	Czech Republic	1	EBA	206	Ring	Litoměřice	Moucha 2005
Lukavec (okres Litoměřice)	Czech Republic	1	EBA	190	Ring	Litoměřice	Moucha 2005
Lukavec (okres Litoměřice)	Czech Republic	1	EBA	119	Ring	Litoměřice	Moucha 2005
Lukavec (okres Litoměřice)	Czech Republic	1	EBA	183	Ring	Litoměřice	Moucha 2005
Lukavec (okres Litoměřice)	Czech Republic	1	EBA	196	Ring	Litoměřice	Moucha 2005
Lukavec (okres Litoměřice)	Czech Republic	1	EBA	179	Ring	Litoměřice	Moucha 2005
Lukavec (okres Litoměřice)	Czech Republic	1	EBA	185	Ring	Litoměřice	Moucha 2005
Lukavec (okres Litoměřice)	Czech Republic	1	EBA	196	Ring	Litoměřice	Moucha 2005
Lukavec (okres Litoměřice)	Czech Republic	1	EBA	202	Ring	Litoměřice	Moucha 2005
Lukavec (okres Litoměřice)	Czech Republic	1	EBA	198	Ring	Litoměřice	Moucha 2005
Lukavec (okres Litoměřice)	Czech Republic	1	EBA	199	Ring	Litoměřice	Moucha 2005
Lukavec (okres Litoměřice)	Czech Republic	1	EBA	208	Ring	Litoměřice	Moucha 2005
Lukavec (okres Litoměřice)	Czech Republic	1	EBA	164	Ring	Litoměřice	Moucha 2005
Lukavec (okres Litoměřice)	Czech Republic	1	EBA	200	Ring	Litoměřice	Moucha 2005
Lukavec (okres Litoměřice)	Czech Republic	1	EBA	181	Ring	Litoměřice	Moucha 2005
Lukavec (okres Litoměřice)	Czech Republic	1	EBA	193	Ring	Litoměřice	Moucha 2005
Lukavec (okres Litoměřice)	Czech Republic	1	EBA	197	Ring	Litoměřice	Moucha 2005
Lukavec (okres Litoměřice)	Czech Republic	1	EBA	183	Ring	Litoměřice	Moucha 2005
Lukavec (okres Litoměřice)	Czech Republic	1	EBA	193	Ring	Litoměřice	Moucha 2005
Lukavec (okres Litoměřice)	Czech Republic	1	EBA	194	Ring	Litoměřice	Moucha 2005
Lukavec (okres Litoměřice)	Czech Republic	1	EBA	188	Ring	Litoměřice	Moucha 2005
Lukavec (okres Litoměřice)	Czech Republic	1	EBA	194	Ring	Litoměřice	Moucha 2005
Lukavec (okres Litoměřice)	Czech Republic	1	EBA	175	Ring	Litoměřice	Moucha 2005
Lukavec (okres Litoměřice)	Czech Republic	1	EBA	187	Ring	Litoměřice	Moucha 2005
Lukavec (okres Litoměřice)	Czech Republic	1	EBA	221	Ring	Litoměřice	Moucha 2005
Lukavec (okres Litoměřice)	Czech Republic	1	EBA	189	Ring	Litoměřice	Moucha 2005
Lukavec (okres Litoměřice)	Czech Republic	1	EBA	194	Ring	Litoměřice	Moucha 2005
Lukavec (okres Litoměřice)	Czech Republic	1	EBA	194	Ring	Litoměřice	Moucha 2005
Lukavec (okres Litoměřice)	Czech Republic	1	EBA	190	Ring	Litoměřice	Moucha 2005
Lukavec (okres Litoměřice)	Czech Republic	1	EBA	199	Ring	Litoměřice	Moucha 2005
Lukavec (okres Litoměřice)	Czech Republic	1	EBA	195	Ring	Litoměřice	Moucha 2005
Lukavec (okres Litoměřice)	Czech Republic	1	EBA	197	Ring	Litoměřice	Moucha 2005
Lukavec (okres Litoměřice)	Czech Republic	1	EBA	185	Ring	Litoměřice	Moucha 2005
Lukavec (okres Litoměřice)	Czech Republic	1	EBA	201	Ring	Litoměřice	Moucha 2005
Lukavec (okres Litoměřice)	Czech Republic	1	EBA	202	Ring	Litoměřice	Moucha 2005
Lukavec (okres Litoměřice)	Czech Republic	1	EBA	195	Ring	Litoměřice	Moucha 2005
Lukavec (okres Litoměřice)	Czech Republic	1	EBA	194	Ring	Litoměřice	Moucha 2005
Lukavec (okres Litoměřice)	Czech Republic	1	EBA	195	Ring	Litoměřice	Moucha 2005
Lukavec (okres Litoměřice)	Czech Republic	1	EBA	211	Ring	Litoměřice	Moucha 2005
Lukavec (okres Litoměřice)	Czech Republic	1	EBA	188	Ring	Litoměřice	Moucha 2005
Lukavec (okres Litoměřice)	Czech Republic	1	EBA	202	Ring	Litoměřice	Moucha 2005
Lukavec (okres Litoměřice)	Czech Republic	1	EBA	188	Ring	Litoměřice	Moucha 2005
Lukavec (okres Litoměřice)	Czech Republic	1	EBA	213	Ring	Litoměřice	Moucha 2005
Luštěnice	Czech Republic	1	EBA	196	Ring	Mladá Boleslav//Dobrovice	Moucha 2005
Luštěnice	Czech Republic	1	EBA	194	Ring	Mladá Boleslav//Dobrovice	Moucha 2005
Luštěnice	Czech Republic	1	EBA	201	Ring	Mladá Boleslav//Dobrovice	Moucha 2005
Luštěnice	Czech Republic	1	EBA	171	Ring	Mladá Boleslav//Dobrovice	Moucha 2005
Luštěnice	Czech Republic	1	EBA	193	Ring	Mladá Boleslav//Dobrovice	Moucha 2005
Luštěnice	Czech Republic	1	EBA	192	Ring	Mladá Boleslav//Dobrovice	Moucha 2005
Luštěnice	Czech Republic	1	EBA	205	Ring	Mladá Boleslav//Dobrovice	Moucha 2005
Luštěnice	Czech Republic	1	EBA	183	Ring	Mladá Boleslav//Dobrovice	Moucha 2005
Luštěnice	Czech Republic	1	EBA	140	Ring	Mladá Boleslav//Dobrovice	Moucha 2005
Luštěnice	Czech Republic	1	EBA	200	Ring	Mladá Boleslav//Dobrovice	Moucha 2005
Luštěnice	Czech Republic	1	EBA	181	Ring	Mladá Boleslav//Dobrovice	Moucha 2005
Luštěnice	Czech Republic	1	EBA	182	Ring	Mladá Boleslav//Dobrovice	Moucha 2005
Luštěnice	Czech Republic	1	EBA	180	Ring	Mladá Boleslav//Dobrovice	Moucha 2005
Luštěnice	Czech Republic	1	EBA	218	Ring	Mladá Boleslav//Dobrovice	Moucha 2005
Luštěnice	Czech Republic	1	EBA	200	Ring	Mladá Boleslav//Dobrovice	Moucha 2005
Luštěnice	Czech Republic	1	EBA	209	Ring	Mladá Boleslav//Dobrovice	Moucha 2005
Luštěnice	Czech Republic	1	EBA	182	Ring	Mladá Boleslav//Dobrovice	Moucha 2005
Luštěnice	Czech Republic	1	EBA	183	Ring	Mladá Boleslav//Dobrovice	Moucha 2005
Luštěnice	Czech Republic	1	EBA	196	Ring	Mladá Boleslav//Dobrovice	Moucha 2005
Luštěnice	Czech Republic	1	EBA	179	Ring	Mladá Boleslav//Dobrovice	Moucha 2005
Luštěnice	Czech Republic	1	EBA	190	Ring	Mladá Boleslav//Dobrovice	Moucha 2005
Luštěnice	Czech Republic	1	EBA	168	Ring	Mladá Boleslav//Dobrovice	Moucha 2005
Luštěnice	Czech Republic	1	EBA	176	Ring	Mladá Boleslav//Dobrovice	Moucha 2005
Luštěnice	Czech Republic	1	EBA	188	Ring	Mladá Boleslav//Dobrovice	Moucha 2005
Luštěnice	Czech Republic	1	EBA	163	Ring	Mladá Boleslav//Dobrovice	Moucha 2005
Mainburg	Germany	1	EBA	136	Rib	Mainburg	Menke 1978/1979; Stein 1979
Mainburg	Germany	1	EBA	128	Rib	Mainburg	Menke 1978/1979; Stein 1979
Mainburg	Germany	1	EBA	128	Rib	Mainburg	Menke 1978/1979; Stein 1979
Mainburg	Germany	1	EBA	126	Rib	Mainburg	Menke 1978/1979; Stein 1979
Mainburg	Germany	1	EBA	121	Rib	Mainburg	Menke 1978/1979; Stein 1979
Mainburg	Germany	1	EBA	117	Rib	Mainburg	Menke 1978/1979; Stein 1979
Mainburg	Germany	1	EBA	114	Rib	Mainburg	Menke 1978/1979; Stein 1979
Mainburg	Germany	1	EBA	111	Rib	Mainburg	Menke 1978/1979; Stein 1979
Mainburg	Germany	1	EBA	99	Rib	Mainburg	Menke 1978/1979; Stein 1979
Mainburg	Germany	1	EBA	140	Rib	Mainburg	Menke 1978/1979; Stein 1979
Mainburg	Germany	1	EBA	106	Rib	Mainburg	Menke 1978/1979; Stein 1979
Mainburg	Germany	1	EBA	106	Rib	Mainburg	Menke 1978/1979; Stein 1979
Mainburg	Germany	1	EBA	107	Rib	Mainburg	Menke 1978/1979; Stein 1979
Makotřasy	Czech Republic	1	EBA	197	Ring	Prague	Moucha 2005
Makotřasy	Czech Republic	1	EBA	228	Ring	Prague	Moucha 2005
Marefy	Czech Republic	1	EBA	191	Ring	Brno	Lenerz- de Wilde documentation
Marefy	Czech Republic	1	EBA	191	Ring	Brno	Lenerz- de Wilde documentation
Marefy	Czech Republic	1	EBA	146	Ring	Brno	Lenerz- de Wilde documentation
Marefy	Czech Republic	1	EBA	182	Ring	Brno	Lenerz- de Wilde documentation
Marefy	Czech Republic	1	EBA	198	Ring	Brno	Lenerz- de Wilde documentation
Marefy	Czech Republic	1	EBA	201	Ring	Brno	Lenerz- de Wilde documentation
Marefy	Czech Republic	1	EBA	221	Ring	Brno	Lenerz- de Wilde documentation
Marefy	Czech Republic	1	EBA	105	Ring	Brno	Lenerz- de Wilde documentation
Mauthausen	Germany	1	EBA	207.5	Ring	Bad Reichenhall	Lenerz- de Wilde documentation; Menke 1987/1979
Mauthausen	Germany	1	EBA	210.5	Ring	Bad Reichenhall	Lenerz- de Wilde documentation; Menke 1987/1979
Mauthausen	Germany	1	EBA	200	Ring	Bad Reichenhall	Lenerz- de Wilde documentation; Menke 1987/1979
Mauthausen	Germany	1	EBA	207	Ring	Bad Reichenhall	Lenerz- de Wilde documentation; Menke 1987/1979
Mauthausen	Germany	1	EBA	207	Ring	Bad Reichenhall	Lenerz- de Wilde documentation; Menke 1987/1979
Mauthausen	Germany	1	EBA	207	Ring	Bad Reichenhall	Lenerz- de Wilde documentation; Menke 1987/1979
Mauthausen	Germany	1	EBA	207	Ring	Bad Reichenhall	Lenerz- de Wilde documentation; Menke 1987/1979
Mauthausen	Germany	1	EBA	207.5	Ring	Bad Reichenhall	Lenerz- de Wilde documentation; Menke 1987/1979
Mauthausen	Germany	1	EBA	208	Ring	Bad Reichenhall	Lenerz- de Wilde documentation; Menke 1987/1979
Mauthausen	Germany	1	EBA	208	Ring	Bad Reichenhall	Lenerz- de Wilde documentation; Menke 1987/1979
Mauthausen	Germany	1	EBA	208	Ring	Bad Reichenhall	Lenerz- de Wilde documentation; Menke 1987/1979
Mauthausen	Germany	1	EBA	208	Ring	Bad Reichenhall	Lenerz- de Wilde documentation; Menke 1987/1979
Mauthausen	Germany	1	EBA	208.5	Ring	Bad Reichenhall	Lenerz- de Wilde documentation; Menke 1987/1979
Mauthausen	Germany	1	EBA	209	Ring	Bad Reichenhall	Lenerz- de Wilde documentation; Menke 1987/1979
Mauthausen	Germany	1	EBA	209	Ring	Bad Reichenhall	Lenerz- de Wilde documentation; Menke 1987/1979
Mauthausen	Germany	1	EBA	206	Ring	Bad Reichenhall	Lenerz- de Wilde documentation; Menke 1987/1979
Mauthausen	Germany	1	EBA	212.5	Ring	Bad Reichenhall	Lenerz- de Wilde documentation; Menke 1987/1979
Mauthausen	Germany	1	EBA	215	Ring	Bad Reichenhall	Lenerz- de Wilde documentation; Menke 1987/1979
Mauthausen	Germany	1	EBA	214	Ring	Bad Reichenhall	Lenerz- de Wilde documentation; Menke 1987/1979
Mauthausen	Germany	1	EBA	213.5	Ring	Bad Reichenhall	Lenerz- de Wilde documentation; Menke 1987/1979
Mauthausen	Germany	1	EBA	213.5	Ring	Bad Reichenhall	Lenerz- de Wilde documentation; Menke 1987/1979
Mauthausen	Germany	1	EBA	213.5	Ring	Bad Reichenhall	Lenerz- de Wilde documentation; Menke 1987/1979
Mauthausen	Germany	1	EBA	209	Ring	Bad Reichenhall	Lenerz- de Wilde documentation; Menke 1987/1979
Mauthausen	Germany	1	EBA	212.5	Ring	Bad Reichenhall	Lenerz- de Wilde documentation; Menke 1987/1979
Mauthausen	Germany	1	EBA	209	Ring	Bad Reichenhall	Lenerz- de Wilde documentation; Menke 1987/1979
Mauthausen	Germany	1	EBA	212	Ring	Bad Reichenhall	Lenerz- de Wilde documentation; Menke 1987/1979
Mauthausen	Germany	1	EBA	211.5	Ring	Bad Reichenhall	Lenerz- de Wilde documentation; Menke 1987/1979
Mauthausen	Germany	1	EBA	211	Ring	Bad Reichenhall	Lenerz- de Wilde documentation; Menke 1987/1979
Mauthausen	Germany	1	EBA	210.5	Ring	Bad Reichenhall	Lenerz- de Wilde documentation; Menke 1987/1979
Mauthausen	Germany	1	EBA	210.5	Ring	Bad Reichenhall	Lenerz- de Wilde documentation; Menke 1987/1979
Mauthausen	Germany	1	EBA	206	Ring	Bad Reichenhall	Lenerz- de Wilde documentation; Menke 1987/1979
Mauthausen	Germany	1	EBA	213	Ring	Bad Reichenhall	Lenerz- de Wilde documentation; Menke 1987/1979
Mauthausen	Germany	1	EBA	202	Ring	Bad Reichenhall	Lenerz- de Wilde documentation; Menke 1987/1979
Mauthausen	Germany	1	EBA	166.5	Ring	Bad Reichenhall	Lenerz- de Wilde documentation; Menke 1987/1979
Mauthausen	Germany	1	EBA	200	Ring	Bad Reichenhall	Lenerz- de Wilde documentation; Menke 1987/1979
Mauthausen	Germany	1	EBA	200	Ring	Bad Reichenhall	Lenerz- de Wilde documentation; Menke 1987/1979
Mauthausen	Germany	1	EBA	200.5	Ring	Bad Reichenhall	Lenerz- de Wilde documentation; Menke 1987/1979
Mauthausen	Germany	1	EBA	200.5	Ring	Bad Reichenhall	Lenerz- de Wilde documentation; Menke 1987/1979
Mauthausen	Germany	1	EBA	200.5	Ring	Bad Reichenhall	Lenerz- de Wilde documentation; Menke 1987/1979
Mauthausen	Germany	1	EBA	201	Ring	Bad Reichenhall	Lenerz- de Wilde documentation; Menke 1987/1979
Mauthausen	Germany	1	EBA	201	Ring	Bad Reichenhall	Lenerz- de Wilde documentation; Menke 1987/1979
Mauthausen	Germany	1	EBA	201	Ring	Bad Reichenhall	Lenerz- de Wilde documentation; Menke 1987/1979
Mauthausen	Germany	1	EBA	201	Ring	Bad Reichenhall	Lenerz- de Wilde documentation; Menke 1987/1979
Mauthausen	Germany	1	EBA	201	Ring	Bad Reichenhall	Lenerz- de Wilde documentation; Menke 1987/1979
Mauthausen	Germany	1	EBA	201	Ring	Bad Reichenhall	Lenerz- de Wilde documentation; Menke 1987/1979
Mauthausen	Germany	1	EBA	201.5	Ring	Bad Reichenhall	Lenerz- de Wilde documentation; Menke 1987/1979
Mauthausen	Germany	1	EBA	206	Ring	Bad Reichenhall	Lenerz- de Wilde documentation; Menke 1987/1979
Mauthausen	Germany	1	EBA	204	Ring	Bad Reichenhall	Lenerz- de Wilde documentation; Menke 1987/1979
Mauthausen	Germany	1	EBA	206	Ring	Bad Reichenhall	Lenerz- de Wilde documentation; Menke 1987/1979
Mauthausen	Germany	1	EBA	206	Ring	Bad Reichenhall	Lenerz- de Wilde documentation; Menke 1987/1979
Mauthausen	Germany	1	EBA	205.5	Ring	Bad Reichenhall	Lenerz- de Wilde documentation; Menke 1987/1979
Mauthausen	Germany	1	EBA	205.5	Ring	Bad Reichenhall	Lenerz- de Wilde documentation; Menke 1987/1979
Mauthausen	Germany	1	EBA	205	Ring	Bad Reichenhall	Lenerz- de Wilde documentation; Menke 1987/1979
Mauthausen	Germany	1	EBA	201.5	Ring	Bad Reichenhall	Lenerz- de Wilde documentation; Menke 1987/1979
Mauthausen	Germany	1	EBA	204.5	Ring	Bad Reichenhall	Lenerz- de Wilde documentation; Menke 1987/1979
Mauthausen	Germany	1	EBA	201.5	Ring	Bad Reichenhall	Lenerz- de Wilde documentation; Menke 1987/1979
Mauthausen	Germany	1	EBA	204	Ring	Bad Reichenhall	Lenerz- de Wilde documentation; Menke 1987/1979
Mauthausen	Germany	1	EBA	203	Ring	Bad Reichenhall	Lenerz- de Wilde documentation; Menke 1987/1979
Mauthausen	Germany	1	EBA	202.5	Ring	Bad Reichenhall	Lenerz- de Wilde documentation; Menke 1987/1979
Mauthausen	Germany	1	EBA	202.5	Ring	Bad Reichenhall	Lenerz- de Wilde documentation; Menke 1987/1979
Mauthausen	Germany	1	EBA	202	Ring	Bad Reichenhall	Lenerz- de Wilde documentation; Menke 1987/1979
Mauthausen	Germany	1	EBA	216	Ring	Bad Reichenhall	Lenerz- de Wilde documentation; Menke 1987/1979
Mauthausen	Germany	1	EBA	205	Ring	Bad Reichenhall	Lenerz- de Wilde documentation; Menke 1987/1979
Mauthausen	Germany	1	EBA	148	Ring	Bad Reichenhall	Lenerz- de Wilde documentation; Menke 1987/1979
Mauthausen	Germany	1	EBA	230	Ring	Bad Reichenhall	Lenerz- de Wilde documentation; Menke 1987/1979
Mauthausen	Germany	1	EBA	230.5	Ring	Bad Reichenhall	Lenerz- de Wilde documentation; Menke 1987/1979
Mauthausen	Germany	1	EBA	231.5	Ring	Bad Reichenhall	Lenerz- de Wilde documentation; Menke 1987/1979
Mauthausen	Germany	1	EBA	234.5	Ring	Bad Reichenhall	Lenerz- de Wilde documentation; Menke 1987/1979
Mauthausen	Germany	1	EBA	242	Ring	Bad Reichenhall	Lenerz- de Wilde documentation; Menke 1987/1979
Mauthausen	Germany	1	EBA	243	Ring	Bad Reichenhall	Lenerz- de Wilde documentation; Menke 1987/1979
Mauthausen	Germany	1	EBA	246.5	Ring	Bad Reichenhall	Lenerz- de Wilde documentation; Menke 1987/1979
Mauthausen	Germany	1	EBA	285.5	Ring	Bad Reichenhall	Lenerz- de Wilde documentation; Menke 1987/1979
Mauthausen	Germany	1	EBA	289	Ring	Bad Reichenhall	Lenerz- de Wilde documentation; Menke 1987/1979
Mauthausen	Germany	1	EBA	293.5	Ring	Bad Reichenhall	Lenerz- de Wilde documentation; Menke 1987/1979
Mauthausen	Germany	1	EBA	295	Ring	Bad Reichenhall	Lenerz- de Wilde documentation; Menke 1987/1979
Mauthausen	Germany	1	EBA	127.5	Ring	Bad Reichenhall	Lenerz- de Wilde documentation; Menke 1987/1979
Mauthausen	Germany	1	EBA	141	Ring	Bad Reichenhall	Lenerz- de Wilde documentation; Menke 1987/1979
Mauthausen	Germany	1	EBA	215	Ring	Bad Reichenhall	Lenerz- de Wilde documentation; Menke 1987/1979
Mauthausen	Germany	1	EBA	162.5	Ring	Bad Reichenhall	Lenerz- de Wilde documentation; Menke 1987/1979
Mauthausen	Germany	1	EBA	166	Ring	Bad Reichenhall	Lenerz- de Wilde documentation; Menke 1987/1979
Mauthausen	Germany	1	EBA	166	Ring	Bad Reichenhall	Lenerz- de Wilde documentation; Menke 1987/1979
Mauthausen	Germany	1	EBA	166	Ring	Bad Reichenhall	Lenerz- de Wilde documentation; Menke 1987/1979
Mauthausen	Germany	1	EBA	164.5	Ring	Bad Reichenhall	Lenerz- de Wilde documentation; Menke 1987/1979
Mauthausen	Germany	1	EBA	164	Ring	Bad Reichenhall	Lenerz- de Wilde documentation; Menke 1987/1979
Mauthausen	Germany	1	EBA	143.5	Ring	Bad Reichenhall	Lenerz- de Wilde documentation; Menke 1987/1979
Mauthausen	Germany	1	EBA	163.5	Ring	Bad Reichenhall	Lenerz- de Wilde documentation; Menke 1987/1979
Mauthausen	Germany	1	EBA	144.5	Ring	Bad Reichenhall	Lenerz- de Wilde documentation; Menke 1987/1979
Mauthausen	Germany	1	EBA	162	Ring	Bad Reichenhall	Lenerz- de Wilde documentation; Menke 1987/1979
Mauthausen	Germany	1	EBA	190.5	Ring	Bad Reichenhall	Lenerz- de Wilde documentation; Menke 1987/1979
Mauthausen	Germany	1	EBA	159	Ring	Bad Reichenhall	Lenerz- de Wilde documentation; Menke 1987/1979
Mauthausen	Germany	1	EBA	208	Ring	Bad Reichenhall	Lenerz- de Wilde documentation; Menke 1987/1979
Mauthausen	Germany	1	EBA	155.5	Ring	Bad Reichenhall	Lenerz- de Wilde documentation; Menke 1987/1979
Mauthausen	Germany	1	EBA	229.5	Ring	Bad Reichenhall	Lenerz- de Wilde documentation; Menke 1987/1979
Mauthausen	Germany	1	EBA	164	Ring	Bad Reichenhall	Lenerz- de Wilde documentation; Menke 1987/1979
Mauthausen	Germany	1	EBA	217	Ring	Bad Reichenhall	Lenerz- de Wilde documentation; Menke 1987/1979
Mauthausen	Germany	1	EBA	229.5	Ring	Bad Reichenhall	Lenerz- de Wilde documentation; Menke 1987/1979
Mauthausen	Germany	1	EBA	220.5	Ring	Bad Reichenhall	Lenerz- de Wilde documentation; Menke 1987/1979
Mauthausen	Germany	1	EBA	218.5	Ring	Bad Reichenhall	Lenerz- de Wilde documentation; Menke 1987/1979
Mauthausen	Germany	1	EBA	218	Ring	Bad Reichenhall	Lenerz- de Wilde documentation; Menke 1987/1979
Mauthausen	Germany	1	EBA	217.5	Ring	Bad Reichenhall	Lenerz- de Wilde documentation; Menke 1987/1979
Mauthausen	Germany	1	EBA	223	Ring	Bad Reichenhall	Lenerz- de Wilde documentation; Menke 1987/1979
Mauthausen	Germany	1	EBA	217	Ring	Bad Reichenhall	Lenerz- de Wilde documentation; Menke 1987/1979
Mauthausen	Germany	1	EBA	223.5	Ring	Bad Reichenhall	Lenerz- de Wilde documentation; Menke 1987/1979
Mauthausen	Germany	1	EBA	216.5	Ring	Bad Reichenhall	Lenerz- de Wilde documentation; Menke 1987/1979
Mauthausen	Germany	1	EBA	216.5	Ring	Bad Reichenhall	Lenerz- de Wilde documentation; Menke 1987/1979
Mauthausen	Germany	1	EBA	216	Ring	Bad Reichenhall	Lenerz- de Wilde documentation; Menke 1987/1979
Mauthausen	Germany	1	EBA	216	Ring	Bad Reichenhall	Lenerz- de Wilde documentation; Menke 1987/1979
Mauthausen	Germany	1	EBA	216	Ring	Bad Reichenhall	Lenerz- de Wilde documentation; Menke 1987/1979
Mauthausen	Germany	1	EBA	200	Ring	Bad Reichenhall	Lenerz- de Wilde documentation; Menke 1987/1979
Mauthausen	Germany	1	EBA	217	Ring	Bad Reichenhall	Lenerz- de Wilde documentation; Menke 1987/1979
Mauthausen	Germany	1	EBA	226.5	Ring	Bad Reichenhall	Lenerz- de Wilde documentation; Menke 1987/1979
Mauthausen	Germany	1	EBA	215.5	Ring	Bad Reichenhall	Lenerz- de Wilde documentation; Menke 1987/1979
Mauthausen	Germany	1	EBA	228.5	Ring	Bad Reichenhall	Lenerz- de Wilde documentation; Menke 1987/1979
Mauthausen	Germany	1	EBA	228	Ring	Bad Reichenhall	Lenerz- de Wilde documentation; Menke 1987/1979
Mauthausen	Germany	1	EBA	228	Ring	Bad Reichenhall	Lenerz- de Wilde documentation; Menke 1987/1979
Mauthausen	Germany	1	EBA	228	Ring	Bad Reichenhall	Lenerz- de Wilde documentation; Menke 1987/1979
Mauthausen	Germany	1	EBA	220.5	Ring	Bad Reichenhall	Lenerz- de Wilde documentation; Menke 1987/1979
Mauthausen	Germany	1	EBA	227.5	Ring	Bad Reichenhall	Lenerz- de Wilde documentation; Menke 1987/1979
Mauthausen	Germany	1	EBA	229.5	Ring	Bad Reichenhall	Lenerz- de Wilde documentation; Menke 1987/1979
Mauthausen	Germany	1	EBA	226	Ring	Bad Reichenhall	Lenerz- de Wilde documentation; Menke 1987/1979
Mauthausen	Germany	1	EBA	226	Ring	Bad Reichenhall	Lenerz- de Wilde documentation; Menke 1987/1979
Mauthausen	Germany	1	EBA	225.5	Ring	Bad Reichenhall	Lenerz- de Wilde documentation; Menke 1987/1979
Mauthausen	Germany	1	EBA	225	Ring	Bad Reichenhall	Lenerz- de Wilde documentation; Menke 1987/1979
Mauthausen	Germany	1	EBA	224.5	Ring	Bad Reichenhall	Lenerz- de Wilde documentation; Menke 1987/1979
Mauthausen	Germany	1	EBA	224	Ring	Bad Reichenhall	Lenerz- de Wilde documentation; Menke 1987/1979
Mauthausen	Germany	1	EBA	227.5	Ring	Bad Reichenhall	Lenerz- de Wilde documentation; Menke 1987/1979
Mauthausen	Germany	1	EBA	184	Ring	Bad Reichenhall	Lenerz- de Wilde documentation; Menke 1987/1979
Mauthausen	Germany	1	EBA	200	Ring	Bad Reichenhall	Lenerz- de Wilde documentation; Menke 1987/1979
Mauthausen	Germany	1	EBA	178	Ring	Bad Reichenhall	Lenerz- de Wilde documentation; Menke 1987/1979
Mauthausen	Germany	1	EBA	179.5	Ring	Bad Reichenhall	Lenerz- de Wilde documentation; Menke 1987/1979
Mauthausen	Germany	1	EBA	180	Ring	Bad Reichenhall	Lenerz- de Wilde documentation; Menke 1987/1979
Mauthausen	Germany	1	EBA	180.5	Ring	Bad Reichenhall	Lenerz- de Wilde documentation; Menke 1987/1979
Mauthausen	Germany	1	EBA	180.5	Ring	Bad Reichenhall	Lenerz- de Wilde documentation; Menke 1987/1979
Mauthausen	Germany	1	EBA	180.5	Ring	Bad Reichenhall	Lenerz- de Wilde documentation; Menke 1987/1979
Mauthausen	Germany	1	EBA	181.5	Ring	Bad Reichenhall	Lenerz- de Wilde documentation; Menke 1987/1979
Mauthausen	Germany	1	EBA	182	Ring	Bad Reichenhall	Lenerz- de Wilde documentation; Menke 1987/1979
Mauthausen	Germany	1	EBA	182	Ring	Bad Reichenhall	Lenerz- de Wilde documentation; Menke 1987/1979
Mauthausen	Germany	1	EBA	183	Ring	Bad Reichenhall	Lenerz- de Wilde documentation; Menke 1987/1979
Mauthausen	Germany	1	EBA	183.5	Ring	Bad Reichenhall	Lenerz- de Wilde documentation; Menke 1987/1979
Mauthausen	Germany	1	EBA	184	Ring	Bad Reichenhall	Lenerz- de Wilde documentation; Menke 1987/1979
Mauthausen	Germany	1	EBA	178	Ring	Bad Reichenhall	Lenerz- de Wilde documentation; Menke 1987/1979
Mauthausen	Germany	1	EBA	186	Ring	Bad Reichenhall	Lenerz- de Wilde documentation; Menke 1987/1979
Mauthausen	Germany	1	EBA	188	Ring	Bad Reichenhall	Lenerz- de Wilde documentation; Menke 1987/1979
Mauthausen	Germany	1	EBA	187.5	Ring	Bad Reichenhall	Lenerz- de Wilde documentation; Menke 1987/1979
Mauthausen	Germany	1	EBA	187.5	Ring	Bad Reichenhall	Lenerz- de Wilde documentation; Menke 1987/1979
Mauthausen	Germany	1	EBA	187.5	Ring	Bad Reichenhall	Lenerz- de Wilde documentation; Menke 1987/1979
Mauthausen	Germany	1	EBA	187	Ring	Bad Reichenhall	Lenerz- de Wilde documentation; Menke 1987/1979
Mauthausen	Germany	1	EBA	184	Ring	Bad Reichenhall	Lenerz- de Wilde documentation; Menke 1987/1979
Mauthausen	Germany	1	EBA	186.5	Ring	Bad Reichenhall	Lenerz- de Wilde documentation; Menke 1987/1979
Mauthausen	Germany	1	EBA	184	Ring	Bad Reichenhall	Lenerz- de Wilde documentation; Menke 1987/1979
Mauthausen	Germany	1	EBA	185.5	Ring	Bad Reichenhall	Lenerz- de Wilde documentation; Menke 1987/1979
Mauthausen	Germany	1	EBA	185.5	Ring	Bad Reichenhall	Lenerz- de Wilde documentation; Menke 1987/1979
Mauthausen	Germany	1	EBA	185.5	Ring	Bad Reichenhall	Lenerz- de Wilde documentation; Menke 1987/1979
Mauthausen	Germany	1	EBA	185	Ring	Bad Reichenhall	Lenerz- de Wilde documentation; Menke 1987/1979
Mauthausen	Germany	1	EBA	185	Ring	Bad Reichenhall	Lenerz- de Wilde documentation; Menke 1987/1979
Mauthausen	Germany	1	EBA	178	Ring	Bad Reichenhall	Lenerz- de Wilde documentation; Menke 1987/1979
Mauthausen	Germany	1	EBA	187	Ring	Bad Reichenhall	Lenerz- de Wilde documentation; Menke 1987/1979
Mauthausen	Germany	1	EBA	169.5	Ring	Bad Reichenhall	Lenerz- de Wilde documentation; Menke 1987/1979
Mauthausen	Germany	1	EBA	119.5	Ring	Bad Reichenhall	Lenerz- de Wilde documentation; Menke 1987/1979
Mauthausen	Germany	1	EBA	121	Ring	Bad Reichenhall	Lenerz- de Wilde documentation; Menke 1987/1979
Mauthausen	Germany	1	EBA	141.5	Ring	Bad Reichenhall	Lenerz- de Wilde documentation; Menke 1987/1979
Mauthausen	Germany	1	EBA	144.5	Ring	Bad Reichenhall	Lenerz- de Wilde documentation; Menke 1987/1979
Mauthausen	Germany	1	EBA	144.5	Ring	Bad Reichenhall	Lenerz- de Wilde documentation; Menke 1987/1979
Mauthausen	Germany	1	EBA	151	Ring	Bad Reichenhall	Lenerz- de Wilde documentation; Menke 1987/1979
Mauthausen	Germany	1	EBA	153	Ring	Bad Reichenhall	Lenerz- de Wilde documentation; Menke 1987/1979
Mauthausen	Germany	1	EBA	155.5	Ring	Bad Reichenhall	Lenerz- de Wilde documentation; Menke 1987/1979
Mauthausen	Germany	1	EBA	159	Ring	Bad Reichenhall	Lenerz- de Wilde documentation; Menke 1987/1979
Mauthausen	Germany	1	EBA	159.5	Ring	Bad Reichenhall	Lenerz- de Wilde documentation; Menke 1987/1979
Mauthausen	Germany	1	EBA	160	Ring	Bad Reichenhall	Lenerz- de Wilde documentation; Menke 1987/1979
Mauthausen	Germany	1	EBA	163	Ring	Bad Reichenhall	Lenerz- de Wilde documentation; Menke 1987/1979
Mauthausen	Germany	1	EBA	165	Ring	Bad Reichenhall	Lenerz- de Wilde documentation; Menke 1987/1979
Mauthausen	Germany	1	EBA	178	Ring	Bad Reichenhall	Lenerz- de Wilde documentation; Menke 1987/1979
Mauthausen	Germany	1	EBA	172.5	Ring	Bad Reichenhall	Lenerz- de Wilde documentation; Menke 1987/1979
Mauthausen	Germany	1	EBA	178	Ring	Bad Reichenhall	Lenerz- de Wilde documentation; Menke 1987/1979
Mauthausen	Germany	1	EBA	176.5	Ring	Bad Reichenhall	Lenerz- de Wilde documentation; Menke 1987/1979
Mauthausen	Germany	1	EBA	175.5	Ring	Bad Reichenhall	Lenerz- de Wilde documentation; Menke 1987/1979
Mauthausen	Germany	1	EBA	175.5	Ring	Bad Reichenhall	Lenerz- de Wilde documentation; Menke 1987/1979
Mauthausen	Germany	1	EBA	174	Ring	Bad Reichenhall	Lenerz- de Wilde documentation; Menke 1987/1979
Mauthausen	Germany	1	EBA	165.5	Ring	Bad Reichenhall	Lenerz- de Wilde documentation; Menke 1987/1979
Mauthausen	Germany	1	EBA	173	Ring	Bad Reichenhall	Lenerz- de Wilde documentation; Menke 1987/1979
Mauthausen	Germany	1	EBA	169	Ring	Bad Reichenhall	Lenerz- de Wilde documentation; Menke 1987/1979
Mauthausen	Germany	1	EBA	171.5	Ring	Bad Reichenhall	Lenerz- de Wilde documentation; Menke 1987/1979
Mauthausen	Germany	1	EBA	171	Ring	Bad Reichenhall	Lenerz- de Wilde documentation; Menke 1987/1979
Mauthausen	Germany	1	EBA	171	Ring	Bad Reichenhall	Lenerz- de Wilde documentation; Menke 1987/1979
Mauthausen	Germany	1	EBA	170	Ring	Bad Reichenhall	Lenerz- de Wilde documentation; Menke 1987/1979
Mauthausen	Germany	1	EBA	169.5	Ring	Bad Reichenhall	Lenerz- de Wilde documentation; Menke 1987/1979
Mauthausen	Germany	1	EBA	188.5	Ring	Bad Reichenhall	Lenerz- de Wilde documentation; Menke 1987/1979
Mauthausen	Germany	1	EBA	173.5	Ring	Bad Reichenhall	Lenerz- de Wilde documentation; Menke 1987/1979
Mauthausen	Germany	1	EBA	198	Ring	Bad Reichenhall	Lenerz- de Wilde documentation; Menke 1987/1979
Mauthausen	Germany	1	EBA	195.5	Ring	Bad Reichenhall	Lenerz- de Wilde documentation; Menke 1987/1979
Mauthausen	Germany	1	EBA	195.5	Ring	Bad Reichenhall	Lenerz- de Wilde documentation; Menke 1987/1979
Mauthausen	Germany	1	EBA	195.5	Ring	Bad Reichenhall	Lenerz- de Wilde documentation; Menke 1987/1979
Mauthausen	Germany	1	EBA	196	Ring	Bad Reichenhall	Lenerz- de Wilde documentation; Menke 1987/1979
Mauthausen	Germany	1	EBA	196	Ring	Bad Reichenhall	Lenerz- de Wilde documentation; Menke 1987/1979
Mauthausen	Germany	1	EBA	196	Ring	Bad Reichenhall	Lenerz- de Wilde documentation; Menke 1987/1979
Mauthausen	Germany	1	EBA	196	Ring	Bad Reichenhall	Lenerz- de Wilde documentation; Menke 1987/1979
Mauthausen	Germany	1	EBA	196.5	Ring	Bad Reichenhall	Lenerz- de Wilde documentation; Menke 1987/1979
Mauthausen	Germany	1	EBA	196.5	Ring	Bad Reichenhall	Lenerz- de Wilde documentation; Menke 1987/1979
Mauthausen	Germany	1	EBA	196.5	Ring	Bad Reichenhall	Lenerz- de Wilde documentation; Menke 1987/1979
Mauthausen	Germany	1	EBA	196.5	Ring	Bad Reichenhall	Lenerz- de Wilde documentation; Menke 1987/1979
Mauthausen	Germany	1	EBA	197	Ring	Bad Reichenhall	Lenerz- de Wilde documentation; Menke 1987/1979
Mauthausen	Germany	1	EBA	197	Ring	Bad Reichenhall	Lenerz- de Wilde documentation; Menke 1987/1979
Mauthausen	Germany	1	EBA	188	Ring	Bad Reichenhall	Lenerz- de Wilde documentation; Menke 1987/1979
Mauthausen	Germany	1	EBA	199	Ring	Bad Reichenhall	Lenerz- de Wilde documentation; Menke 1987/1979
Mauthausen	Germany	1	EBA	200	Ring	Bad Reichenhall	Lenerz- de Wilde documentation; Menke 1987/1979
Mauthausen	Germany	1	EBA	199.5	Ring	Bad Reichenhall	Lenerz- de Wilde documentation; Menke 1987/1979
Mauthausen	Germany	1	EBA	199.5	Ring	Bad Reichenhall	Lenerz- de Wilde documentation; Menke 1987/1979
Mauthausen	Germany	1	EBA	199.5	Ring	Bad Reichenhall	Lenerz- de Wilde documentation; Menke 1987/1979
Mauthausen	Germany	1	EBA	199	Ring	Bad Reichenhall	Lenerz- de Wilde documentation; Menke 1987/1979
Mauthausen	Germany	1	EBA	197.5	Ring	Bad Reichenhall	Lenerz- de Wilde documentation; Menke 1987/1979
Mauthausen	Germany	1	EBA	199	Ring	Bad Reichenhall	Lenerz- de Wilde documentation; Menke 1987/1979
Mauthausen	Germany	1	EBA	198	Ring	Bad Reichenhall	Lenerz- de Wilde documentation; Menke 1987/1979
Mauthausen	Germany	1	EBA	199	Ring	Bad Reichenhall	Lenerz- de Wilde documentation; Menke 1987/1979
Mauthausen	Germany	1	EBA	198.5	Ring	Bad Reichenhall	Lenerz- de Wilde documentation; Menke 1987/1979
Mauthausen	Germany	1	EBA	198.5	Ring	Bad Reichenhall	Lenerz- de Wilde documentation; Menke 1987/1979
Mauthausen	Germany	1	EBA	198	Ring	Bad Reichenhall	Lenerz- de Wilde documentation; Menke 1987/1979
Mauthausen	Germany	1	EBA	198	Ring	Bad Reichenhall	Lenerz- de Wilde documentation; Menke 1987/1979
Mauthausen	Germany	1	EBA	195	Ring	Bad Reichenhall	Lenerz- de Wilde documentation; Menke 1987/1979
Mauthausen	Germany	1	EBA	199	Ring	Bad Reichenhall	Lenerz- de Wilde documentation; Menke 1987/1979
Mauthausen	Germany	1	EBA	190	Ring	Bad Reichenhall	Lenerz- de Wilde documentation; Menke 1987/1979
Mauthausen	Germany	1	EBA	195.5	Ring	Bad Reichenhall	Lenerz- de Wilde documentation; Menke 1987/1979
Mauthausen	Germany	1	EBA	190.5	Ring	Bad Reichenhall	Lenerz- de Wilde documentation; Menke 1987/1979
Mauthausen	Germany	1	EBA	190.5	Ring	Bad Reichenhall	Lenerz- de Wilde documentation; Menke 1987/1979
Mauthausen	Germany	1	EBA	190	Ring	Bad Reichenhall	Lenerz- de Wilde documentation; Menke 1987/1979
Mauthausen	Germany	1	EBA	190	Ring	Bad Reichenhall	Lenerz- de Wilde documentation; Menke 1987/1979
Mauthausen	Germany	1	EBA	191.5	Ring	Bad Reichenhall	Lenerz- de Wilde documentation; Menke 1987/1979
Mauthausen	Germany	1	EBA	190	Ring	Bad Reichenhall	Lenerz- de Wilde documentation; Menke 1987/1979
Mauthausen	Germany	1	EBA	192	Ring	Bad Reichenhall	Lenerz- de Wilde documentation; Menke 1987/1979
Mauthausen	Germany	1	EBA	189.5	Ring	Bad Reichenhall	Lenerz- de Wilde documentation; Menke 1987/1979
Mauthausen	Germany	1	EBA	189.5	Ring	Bad Reichenhall	Lenerz- de Wilde documentation; Menke 1987/1979
Mauthausen	Germany	1	EBA	189	Ring	Bad Reichenhall	Lenerz- de Wilde documentation; Menke 1987/1979
Mauthausen	Germany	1	EBA	189	Ring	Bad Reichenhall	Lenerz- de Wilde documentation; Menke 1987/1979
Mauthausen	Germany	1	EBA	189	Ring	Bad Reichenhall	Lenerz- de Wilde documentation; Menke 1987/1979
Mauthausen	Germany	1	EBA	159	Ring	Bad Reichenhall	Lenerz- de Wilde documentation; Menke 1987/1979
Mauthausen	Germany	1	EBA	190	Ring	Bad Reichenhall	Lenerz- de Wilde documentation; Menke 1987/1979
Mauthausen	Germany	1	EBA	193.5	Ring	Bad Reichenhall	Lenerz- de Wilde documentation; Menke 1987/1979
Mauthausen	Germany	1	EBA	188	Ring	Bad Reichenhall	Lenerz- de Wilde documentation; Menke 1987/1979
Mauthausen	Germany	1	EBA	195	Ring	Bad Reichenhall	Lenerz- de Wilde documentation; Menke 1987/1979
Mauthausen	Germany	1	EBA	195	Ring	Bad Reichenhall	Lenerz- de Wilde documentation; Menke 1987/1979
Mauthausen	Germany	1	EBA	194.5	Ring	Bad Reichenhall	Lenerz- de Wilde documentation; Menke 1987/1979
Mauthausen	Germany	1	EBA	194	Ring	Bad Reichenhall	Lenerz- de Wilde documentation; Menke 1987/1979
Mauthausen	Germany	1	EBA	191	Ring	Bad Reichenhall	Lenerz- de Wilde documentation; Menke 1987/1979
Mauthausen	Germany	1	EBA	194	Ring	Bad Reichenhall	Lenerz- de Wilde documentation; Menke 1987/1979
Mauthausen	Germany	1	EBA	195	Ring	Bad Reichenhall	Lenerz- de Wilde documentation; Menke 1987/1979
Mauthausen	Germany	1	EBA	193	Ring	Bad Reichenhall	Lenerz- de Wilde documentation; Menke 1987/1979
Mauthausen	Germany	1	EBA	193	Ring	Bad Reichenhall	Lenerz- de Wilde documentation; Menke 1987/1979
Mauthausen	Germany	1	EBA	192.5	Ring	Bad Reichenhall	Lenerz- de Wilde documentation; Menke 1987/1979
Mauthausen	Germany	1	EBA	192.5	Ring	Bad Reichenhall	Lenerz- de Wilde documentation; Menke 1987/1979
Mauthausen	Germany	1	EBA	192.5	Ring	Bad Reichenhall	Lenerz- de Wilde documentation; Menke 1987/1979
Mauthausen	Germany	1	EBA	192	Ring	Bad Reichenhall	Lenerz- de Wilde documentation; Menke 1987/1979
Mauthausen	Germany	1	EBA	194	Ring	Bad Reichenhall	Lenerz- de Wilde documentation; Menke 1987/1979
Mauthausen	Germany	1	EBA	209	Ring	Bad Reichenhall	Lenerz- de Wilde documentation; Menke 1987/1979
Mauthausen	Germany	1	EBA	211.5	Ring	Bad Reichenhall	Lenerz- de Wilde documentation; Menke 1987/1979
Mauthausen	Germany	1	EBA	205	Ring	Bad Reichenhall	Lenerz- de Wilde documentation; Menke 1987/1979
Mauthausen	Germany	1	EBA	205.5	Ring	Bad Reichenhall	Lenerz- de Wilde documentation; Menke 1987/1979
Mauthausen	Germany	1	EBA	206	Ring	Bad Reichenhall	Lenerz- de Wilde documentation; Menke 1987/1979
Mauthausen	Germany	1	EBA	206.5	Ring	Bad Reichenhall	Lenerz- de Wilde documentation; Menke 1987/1979
Mauthausen	Germany	1	EBA	206.5	Ring	Bad Reichenhall	Lenerz- de Wilde documentation; Menke 1987/1979
Mauthausen	Germany	1	EBA	207	Ring	Bad Reichenhall	Lenerz- de Wilde documentation; Menke 1987/1979
Mauthausen	Germany	1	EBA	207	Ring	Bad Reichenhall	Lenerz- de Wilde documentation; Menke 1987/1979
Mauthausen	Germany	1	EBA	207	Ring	Bad Reichenhall	Lenerz- de Wilde documentation; Menke 1987/1979
Mauthausen	Germany	1	EBA	207	Ring	Bad Reichenhall	Lenerz- de Wilde documentation; Menke 1987/1979
Mauthausen	Germany	1	EBA	207	Ring	Bad Reichenhall	Lenerz- de Wilde documentation; Menke 1987/1979
Mauthausen	Germany	1	EBA	207	Ring	Bad Reichenhall	Lenerz- de Wilde documentation; Menke 1987/1979
Mauthausen	Germany	1	EBA	207.5	Ring	Bad Reichenhall	Lenerz- de Wilde documentation; Menke 1987/1979
Mauthausen	Germany	1	EBA	204.5	Ring	Bad Reichenhall	Lenerz- de Wilde documentation; Menke 1987/1979
Mauthausen	Germany	1	EBA	210	Ring	Bad Reichenhall	Lenerz- de Wilde documentation; Menke 1987/1979
Mauthausen	Germany	1	EBA	200	Ring	Bad Reichenhall	Lenerz- de Wilde documentation; Menke 1987/1979
Mauthausen	Germany	1	EBA	211	Ring	Bad Reichenhall	Lenerz- de Wilde documentation; Menke 1987/1979
Mauthausen	Germany	1	EBA	211	Ring	Bad Reichenhall	Lenerz- de Wilde documentation; Menke 1987/1979
Mauthausen	Germany	1	EBA	211	Ring	Bad Reichenhall	Lenerz- de Wilde documentation; Menke 1987/1979
Mauthausen	Germany	1	EBA	210.5	Ring	Bad Reichenhall	Lenerz- de Wilde documentation; Menke 1987/1979
Mauthausen	Germany	1	EBA	207.5	Ring	Bad Reichenhall	Lenerz- de Wilde documentation; Menke 1987/1979
Mauthausen	Germany	1	EBA	210.5	Ring	Bad Reichenhall	Lenerz- de Wilde documentation; Menke 1987/1979
Mauthausen	Germany	1	EBA	207.5	Ring	Bad Reichenhall	Lenerz- de Wilde documentation; Menke 1987/1979
Mauthausen	Germany	1	EBA	209.5	Ring	Bad Reichenhall	Lenerz- de Wilde documentation; Menke 1987/1979
Mauthausen	Germany	1	EBA	209.5	Ring	Bad Reichenhall	Lenerz- de Wilde documentation; Menke 1987/1979
Mauthausen	Germany	1	EBA	209	Ring	Bad Reichenhall	Lenerz- de Wilde documentation; Menke 1987/1979
Mauthausen	Germany	1	EBA	209	Ring	Bad Reichenhall	Lenerz- de Wilde documentation; Menke 1987/1979
Mauthausen	Germany	1	EBA	209	Ring	Bad Reichenhall	Lenerz- de Wilde documentation; Menke 1987/1979
Mauthausen	Germany	1	EBA	204.5	Ring	Bad Reichenhall	Lenerz- de Wilde documentation; Menke 1987/1979
Mauthausen	Germany	1	EBA	210.5	Ring	Bad Reichenhall	Lenerz- de Wilde documentation; Menke 1987/1979
Mauthausen	Germany	1	EBA	202	Ring	Bad Reichenhall	Lenerz- de Wilde documentation; Menke 1987/1979
Mauthausen	Germany	1	EBA	200	Ring	Bad Reichenhall	Lenerz- de Wilde documentation; Menke 1987/1979
Mauthausen	Germany	1	EBA	200	Ring	Bad Reichenhall	Lenerz- de Wilde documentation; Menke 1987/1979
Mauthausen	Germany	1	EBA	200	Ring	Bad Reichenhall	Lenerz- de Wilde documentation; Menke 1987/1979
Mauthausen	Germany	1	EBA	200	Ring	Bad Reichenhall	Lenerz- de Wilde documentation; Menke 1987/1979
Mauthausen	Germany	1	EBA	200.5	Ring	Bad Reichenhall	Lenerz- de Wilde documentation; Menke 1987/1979
Mauthausen	Germany	1	EBA	200.5	Ring	Bad Reichenhall	Lenerz- de Wilde documentation; Menke 1987/1979
Mauthausen	Germany	1	EBA	200.5	Ring	Bad Reichenhall	Lenerz- de Wilde documentation; Menke 1987/1979
Mauthausen	Germany	1	EBA	201	Ring	Bad Reichenhall	Lenerz- de Wilde documentation; Menke 1987/1979
Mauthausen	Germany	1	EBA	201	Ring	Bad Reichenhall	Lenerz- de Wilde documentation; Menke 1987/1979
Mauthausen	Germany	1	EBA	201	Ring	Bad Reichenhall	Lenerz- de Wilde documentation; Menke 1987/1979
Mauthausen	Germany	1	EBA	167.5	Ring	Bad Reichenhall	Lenerz- de Wilde documentation; Menke 1987/1979
Mauthausen	Germany	1	EBA	201	Ring	Bad Reichenhall	Lenerz- de Wilde documentation; Menke 1987/1979
Mauthausen	Germany	1	EBA	157	Ring	Bad Reichenhall	Lenerz- de Wilde documentation; Menke 1987/1979
Mauthausen	Germany	1	EBA	205	Ring	Bad Reichenhall	Lenerz- de Wilde documentation; Menke 1987/1979
Mauthausen	Germany	1	EBA	202.5	Ring	Bad Reichenhall	Lenerz- de Wilde documentation; Menke 1987/1979
Mauthausen	Germany	1	EBA	204	Ring	Bad Reichenhall	Lenerz- de Wilde documentation; Menke 1987/1979
Mauthausen	Germany	1	EBA	204	Ring	Bad Reichenhall	Lenerz- de Wilde documentation; Menke 1987/1979
Mauthausen	Germany	1	EBA	204	Ring	Bad Reichenhall	Lenerz- de Wilde documentation; Menke 1987/1979
Mauthausen	Germany	1	EBA	204	Ring	Bad Reichenhall	Lenerz- de Wilde documentation; Menke 1987/1979
Mauthausen	Germany	1	EBA	203.5	Ring	Bad Reichenhall	Lenerz- de Wilde documentation; Menke 1987/1979
Mauthausen	Germany	1	EBA	201.5	Ring	Bad Reichenhall	Lenerz- de Wilde documentation; Menke 1987/1979
Mauthausen	Germany	1	EBA	203	Ring	Bad Reichenhall	Lenerz- de Wilde documentation; Menke 1987/1979
Mauthausen	Germany	1	EBA	202	Ring	Bad Reichenhall	Lenerz- de Wilde documentation; Menke 1987/1979
Mauthausen	Germany	1	EBA	202.5	Ring	Bad Reichenhall	Lenerz- de Wilde documentation; Menke 1987/1979
Mauthausen	Germany	1	EBA	202.5	Ring	Bad Reichenhall	Lenerz- de Wilde documentation; Menke 1987/1979
Mauthausen	Germany	1	EBA	202.5	Ring	Bad Reichenhall	Lenerz- de Wilde documentation; Menke 1987/1979
Mauthausen	Germany	1	EBA	202	Ring	Bad Reichenhall	Lenerz- de Wilde documentation; Menke 1987/1979
Mauthausen	Germany	1	EBA	202	Ring	Bad Reichenhall	Lenerz- de Wilde documentation; Menke 1987/1979
Mauthausen	Germany	1	EBA	211.5	Ring	Bad Reichenhall	Lenerz- de Wilde documentation; Menke 1987/1979
Mauthausen	Germany	1	EBA	203.5	Ring	Bad Reichenhall	Lenerz- de Wilde documentation; Menke 1987/1979
Mauthausen	Germany	1	EBA	233	Ring	Bad Reichenhall	Lenerz- de Wilde documentation; Menke 1987/1979
Mauthausen	Germany	1	EBA	211	Ring	Bad Reichenhall	Lenerz- de Wilde documentation; Menke 1987/1979
Mauthausen	Germany	1	EBA	223	Ring	Bad Reichenhall	Lenerz- de Wilde documentation; Menke 1987/1979
Mauthausen	Germany	1	EBA	223.5	Ring	Bad Reichenhall	Lenerz- de Wilde documentation; Menke 1987/1979
Mauthausen	Germany	1	EBA	224	Ring	Bad Reichenhall	Lenerz- de Wilde documentation; Menke 1987/1979
Mauthausen	Germany	1	EBA	224.5	Ring	Bad Reichenhall	Lenerz- de Wilde documentation; Menke 1987/1979
Mauthausen	Germany	1	EBA	225.5	Ring	Bad Reichenhall	Lenerz- de Wilde documentation; Menke 1987/1979
Mauthausen	Germany	1	EBA	226	Ring	Bad Reichenhall	Lenerz- de Wilde documentation; Menke 1987/1979
Mauthausen	Germany	1	EBA	226.5	Ring	Bad Reichenhall	Lenerz- de Wilde documentation; Menke 1987/1979
Mauthausen	Germany	1	EBA	227	Ring	Bad Reichenhall	Lenerz- de Wilde documentation; Menke 1987/1979
Mauthausen	Germany	1	EBA	227	Ring	Bad Reichenhall	Lenerz- de Wilde documentation; Menke 1987/1979
Mauthausen	Germany	1	EBA	228	Ring	Bad Reichenhall	Lenerz- de Wilde documentation; Menke 1987/1979
Mauthausen	Germany	1	EBA	228.5	Ring	Bad Reichenhall	Lenerz- de Wilde documentation; Menke 1987/1979
Mauthausen	Germany	1	EBA	229	Ring	Bad Reichenhall	Lenerz- de Wilde documentation; Menke 1987/1979
Mauthausen	Germany	1	EBA	222.5	Ring	Bad Reichenhall	Lenerz- de Wilde documentation; Menke 1987/1979
Mauthausen	Germany	1	EBA	237	Ring	Bad Reichenhall	Lenerz- de Wilde documentation; Menke 1987/1979
Mauthausen	Germany	1	EBA	304	Ring	Bad Reichenhall	Lenerz- de Wilde documentation; Menke 1987/1979
Mauthausen	Germany	1	EBA	289.5	Ring	Bad Reichenhall	Lenerz- de Wilde documentation; Menke 1987/1979
Mauthausen	Germany	1	EBA	281	Ring	Bad Reichenhall	Lenerz- de Wilde documentation; Menke 1987/1979
Mauthausen	Germany	1	EBA	259	Ring	Bad Reichenhall	Lenerz- de Wilde documentation; Menke 1987/1979
Mauthausen	Germany	1	EBA	249.5	Ring	Bad Reichenhall	Lenerz- de Wilde documentation; Menke 1987/1979
Mauthausen	Germany	1	EBA	230.5	Ring	Bad Reichenhall	Lenerz- de Wilde documentation; Menke 1987/1979
Mauthausen	Germany	1	EBA	240	Ring	Bad Reichenhall	Lenerz- de Wilde documentation; Menke 1987/1979
Mauthausen	Germany	1	EBA	232	Ring	Bad Reichenhall	Lenerz- de Wilde documentation; Menke 1987/1979
Mauthausen	Germany	1	EBA	237	Ring	Bad Reichenhall	Lenerz- de Wilde documentation; Menke 1987/1979
Mauthausen	Germany	1	EBA	235.5	Ring	Bad Reichenhall	Lenerz- de Wilde documentation; Menke 1987/1979
Mauthausen	Germany	1	EBA	234.5	Ring	Bad Reichenhall	Lenerz- de Wilde documentation; Menke 1987/1979
Mauthausen	Germany	1	EBA	233.5	Ring	Bad Reichenhall	Lenerz- de Wilde documentation; Menke 1987/1979
Mauthausen	Germany	1	EBA	233.5	Ring	Bad Reichenhall	Lenerz- de Wilde documentation; Menke 1987/1979
Mauthausen	Germany	1	EBA	222.5	Ring	Bad Reichenhall	Lenerz- de Wilde documentation; Menke 1987/1979
Mauthausen	Germany	1	EBA	243.5	Ring	Bad Reichenhall	Lenerz- de Wilde documentation; Menke 1987/1979
Mauthausen	Germany	1	EBA	217	Ring	Bad Reichenhall	Lenerz- de Wilde documentation; Menke 1987/1979
Mauthausen	Germany	1	EBA	212	Ring	Bad Reichenhall	Lenerz- de Wilde documentation; Menke 1987/1979
Mauthausen	Germany	1	EBA	212.5	Ring	Bad Reichenhall	Lenerz- de Wilde documentation; Menke 1987/1979
Mauthausen	Germany	1	EBA	212.5	Ring	Bad Reichenhall	Lenerz- de Wilde documentation; Menke 1987/1979
Mauthausen	Germany	1	EBA	213	Ring	Bad Reichenhall	Lenerz- de Wilde documentation; Menke 1987/1979
Mauthausen	Germany	1	EBA	213.5	Ring	Bad Reichenhall	Lenerz- de Wilde documentation; Menke 1987/1979
Mauthausen	Germany	1	EBA	213.5	Ring	Bad Reichenhall	Lenerz- de Wilde documentation; Menke 1987/1979
Mauthausen	Germany	1	EBA	214	Ring	Bad Reichenhall	Lenerz- de Wilde documentation; Menke 1987/1979
Mauthausen	Germany	1	EBA	214	Ring	Bad Reichenhall	Lenerz- de Wilde documentation; Menke 1987/1979
Mauthausen	Germany	1	EBA	214	Ring	Bad Reichenhall	Lenerz- de Wilde documentation; Menke 1987/1979
Mauthausen	Germany	1	EBA	214.5	Ring	Bad Reichenhall	Lenerz- de Wilde documentation; Menke 1987/1979
Mauthausen	Germany	1	EBA	215	Ring	Bad Reichenhall	Lenerz- de Wilde documentation; Menke 1987/1979
Mauthausen	Germany	1	EBA	215.5	Ring	Bad Reichenhall	Lenerz- de Wilde documentation; Menke 1987/1979
Mauthausen	Germany	1	EBA	215.5	Ring	Bad Reichenhall	Lenerz- de Wilde documentation; Menke 1987/1979
Mauthausen	Germany	1	EBA	223	Ring	Bad Reichenhall	Lenerz- de Wilde documentation; Menke 1987/1979
Mauthausen	Germany	1	EBA	219.5	Ring	Bad Reichenhall	Lenerz- de Wilde documentation; Menke 1987/1979
Mauthausen	Germany	1	EBA	222.5	Ring	Bad Reichenhall	Lenerz- de Wilde documentation; Menke 1987/1979
Mauthausen	Germany	1	EBA	222	Ring	Bad Reichenhall	Lenerz- de Wilde documentation; Menke 1987/1979
Mauthausen	Germany	1	EBA	222	Ring	Bad Reichenhall	Lenerz- de Wilde documentation; Menke 1987/1979
Mauthausen	Germany	1	EBA	222	Ring	Bad Reichenhall	Lenerz- de Wilde documentation; Menke 1987/1979
Mauthausen	Germany	1	EBA	221	Ring	Bad Reichenhall	Lenerz- de Wilde documentation; Menke 1987/1979
Mauthausen	Germany	1	EBA	215.5	Ring	Bad Reichenhall	Lenerz- de Wilde documentation; Menke 1987/1979
Mauthausen	Germany	1	EBA	220	Ring	Bad Reichenhall	Lenerz- de Wilde documentation; Menke 1987/1979
Mauthausen	Germany	1	EBA	215.5	Ring	Bad Reichenhall	Lenerz- de Wilde documentation; Menke 1987/1979
Mauthausen	Germany	1	EBA	219	Ring	Bad Reichenhall	Lenerz- de Wilde documentation; Menke 1987/1979
Mauthausen	Germany	1	EBA	219	Ring	Bad Reichenhall	Lenerz- de Wilde documentation; Menke 1987/1979
Mauthausen	Germany	1	EBA	218	Ring	Bad Reichenhall	Lenerz- de Wilde documentation; Menke 1987/1979
Mauthausen	Germany	1	EBA	217	Ring	Bad Reichenhall	Lenerz- de Wilde documentation; Menke 1987/1979
Mauthausen	Germany	1	EBA	217	Ring	Bad Reichenhall	Lenerz- de Wilde documentation; Menke 1987/1979
Mauthausen	Germany	1	EBA	201	Ring	Bad Reichenhall	Lenerz- de Wilde documentation; Menke 1987/1979
Mauthausen	Germany	1	EBA	220	Ring	Bad Reichenhall	Lenerz- de Wilde documentation; Menke 1987/1979
Mauthausen	Germany	1	EBA	188	Ring	Bad Reichenhall	Lenerz- de Wilde documentation; Menke 1987/1979
Mauthausen	Germany	1	EBA	184.5	Ring	Bad Reichenhall	Lenerz- de Wilde documentation; Menke 1987/1979
Mauthausen	Germany	1	EBA	185	Ring	Bad Reichenhall	Lenerz- de Wilde documentation; Menke 1987/1979
Mauthausen	Germany	1	EBA	185	Ring	Bad Reichenhall	Lenerz- de Wilde documentation; Menke 1987/1979
Mauthausen	Germany	1	EBA	185	Ring	Bad Reichenhall	Lenerz- de Wilde documentation; Menke 1987/1979
Mauthausen	Germany	1	EBA	185.5	Ring	Bad Reichenhall	Lenerz- de Wilde documentation; Menke 1987/1979
Mauthausen	Germany	1	EBA	186	Ring	Bad Reichenhall	Lenerz- de Wilde documentation; Menke 1987/1979
Mauthausen	Germany	1	EBA	186	Ring	Bad Reichenhall	Lenerz- de Wilde documentation; Menke 1987/1979
Mauthausen	Germany	1	EBA	186	Ring	Bad Reichenhall	Lenerz- de Wilde documentation; Menke 1987/1979
Mauthausen	Germany	1	EBA	186.5	Ring	Bad Reichenhall	Lenerz- de Wilde documentation; Menke 1987/1979
Mauthausen	Germany	1	EBA	186.5	Ring	Bad Reichenhall	Lenerz- de Wilde documentation; Menke 1987/1979
Mauthausen	Germany	1	EBA	186.5	Ring	Bad Reichenhall	Lenerz- de Wilde documentation; Menke 1987/1979
Mauthausen	Germany	1	EBA	186.5	Ring	Bad Reichenhall	Lenerz- de Wilde documentation; Menke 1987/1979
Mauthausen	Germany	1	EBA	186.5	Ring	Bad Reichenhall	Lenerz- de Wilde documentation; Menke 1987/1979
Mauthausen	Germany	1	EBA	191	Ring	Bad Reichenhall	Lenerz- de Wilde documentation; Menke 1987/1979
Mauthausen	Germany	1	EBA	190	Ring	Bad Reichenhall	Lenerz- de Wilde documentation; Menke 1987/1979
Mauthausen	Germany	1	EBA	191	Ring	Bad Reichenhall	Lenerz- de Wilde documentation; Menke 1987/1979
Mauthausen	Germany	1	EBA	191	Ring	Bad Reichenhall	Lenerz- de Wilde documentation; Menke 1987/1979
Mauthausen	Germany	1	EBA	190.5	Ring	Bad Reichenhall	Lenerz- de Wilde documentation; Menke 1987/1979
Mauthausen	Germany	1	EBA	190.5	Ring	Bad Reichenhall	Lenerz- de Wilde documentation; Menke 1987/1979
Mauthausen	Germany	1	EBA	190.5	Ring	Bad Reichenhall	Lenerz- de Wilde documentation; Menke 1987/1979
Mauthausen	Germany	1	EBA	187	Ring	Bad Reichenhall	Lenerz- de Wilde documentation; Menke 1987/1979
Mauthausen	Germany	1	EBA	190	Ring	Bad Reichenhall	Lenerz- de Wilde documentation; Menke 1987/1979
Mauthausen	Germany	1	EBA	188	Ring	Bad Reichenhall	Lenerz- de Wilde documentation; Menke 1987/1979
Mauthausen	Germany	1	EBA	190	Ring	Bad Reichenhall	Lenerz- de Wilde documentation; Menke 1987/1979
Mauthausen	Germany	1	EBA	200	Ring	Bad Reichenhall	Lenerz- de Wilde documentation; Menke 1987/1979
Mauthausen	Germany	1	EBA	189	Ring	Bad Reichenhall	Lenerz- de Wilde documentation; Menke 1987/1979
Mauthausen	Germany	1	EBA	201.5	Ring	Bad Reichenhall	Lenerz- de Wilde documentation; Menke 1987/1979
Mauthausen	Germany	1	EBA	189	Ring	Bad Reichenhall	Lenerz- de Wilde documentation; Menke 1987/1979
Mauthausen	Germany	1	EBA	184	Ring	Bad Reichenhall	Lenerz- de Wilde documentation; Menke 1987/1979
Mauthausen	Germany	1	EBA	190	Ring	Bad Reichenhall	Lenerz- de Wilde documentation; Menke 1987/1979
Mauthausen	Germany	1	EBA	173	Ring	Bad Reichenhall	Lenerz- de Wilde documentation; Menke 1987/1979
Mauthausen	Germany	1	EBA	184.5	Ring	Bad Reichenhall	Lenerz- de Wilde documentation; Menke 1987/1979
Mauthausen	Germany	1	EBA	176.5	Ring	Bad Reichenhall	Lenerz- de Wilde documentation; Menke 1987/1979
Mauthausen	Germany	1	EBA	176	Ring	Bad Reichenhall	Lenerz- de Wilde documentation; Menke 1987/1979
Mauthausen	Germany	1	EBA	176	Ring	Bad Reichenhall	Lenerz- de Wilde documentation; Menke 1987/1979
Mauthausen	Germany	1	EBA	175.5	Ring	Bad Reichenhall	Lenerz- de Wilde documentation; Menke 1987/1979
Mauthausen	Germany	1	EBA	177.5	Ring	Bad Reichenhall	Lenerz- de Wilde documentation; Menke 1987/1979
Mauthausen	Germany	1	EBA	173.5	Ring	Bad Reichenhall	Lenerz- de Wilde documentation; Menke 1987/1979
Mauthausen	Germany	1	EBA	177.5	Ring	Bad Reichenhall	Lenerz- de Wilde documentation; Menke 1987/1979
Mauthausen	Germany	1	EBA	173	Ring	Bad Reichenhall	Lenerz- de Wilde documentation; Menke 1987/1979
Mauthausen	Germany	1	EBA	172	Ring	Bad Reichenhall	Lenerz- de Wilde documentation; Menke 1987/1979
Mauthausen	Germany	1	EBA	171.5	Ring	Bad Reichenhall	Lenerz- de Wilde documentation; Menke 1987/1979
Mauthausen	Germany	1	EBA	171	Ring	Bad Reichenhall	Lenerz- de Wilde documentation; Menke 1987/1979
Mauthausen	Germany	1	EBA	170.5	Ring	Bad Reichenhall	Lenerz- de Wilde documentation; Menke 1987/1979
Mauthausen	Germany	1	EBA	168	Ring	Bad Reichenhall	Lenerz- de Wilde documentation; Menke 1987/1979
Mauthausen	Germany	1	EBA	175	Ring	Bad Reichenhall	Lenerz- de Wilde documentation; Menke 1987/1979
Mauthausen	Germany	1	EBA	182.5	Ring	Bad Reichenhall	Lenerz- de Wilde documentation; Menke 1987/1979
Mauthausen	Germany	1	EBA	189.5	Ring	Bad Reichenhall	Lenerz- de Wilde documentation; Menke 1987/1979
Mauthausen	Germany	1	EBA	184	Ring	Bad Reichenhall	Lenerz- de Wilde documentation; Menke 1987/1979
Mauthausen	Germany	1	EBA	183.5	Ring	Bad Reichenhall	Lenerz- de Wilde documentation; Menke 1987/1979
Mauthausen	Germany	1	EBA	183.5	Ring	Bad Reichenhall	Lenerz- de Wilde documentation; Menke 1987/1979
Mauthausen	Germany	1	EBA	183	Ring	Bad Reichenhall	Lenerz- de Wilde documentation; Menke 1987/1979
Mauthausen	Germany	1	EBA	177	Ring	Bad Reichenhall	Lenerz- de Wilde documentation; Menke 1987/1979
Mauthausen	Germany	1	EBA	183	Ring	Bad Reichenhall	Lenerz- de Wilde documentation; Menke 1987/1979
Mauthausen	Germany	1	EBA	184	Ring	Bad Reichenhall	Lenerz- de Wilde documentation; Menke 1987/1979
Mauthausen	Germany	1	EBA	182.5	Ring	Bad Reichenhall	Lenerz- de Wilde documentation; Menke 1987/1979
Mauthausen	Germany	1	EBA	182	Ring	Bad Reichenhall	Lenerz- de Wilde documentation; Menke 1987/1979
Mauthausen	Germany	1	EBA	181.5	Ring	Bad Reichenhall	Lenerz- de Wilde documentation; Menke 1987/1979
Mauthausen	Germany	1	EBA	181.5	Ring	Bad Reichenhall	Lenerz- de Wilde documentation; Menke 1987/1979
Mauthausen	Germany	1	EBA	180.5	Ring	Bad Reichenhall	Lenerz- de Wilde documentation; Menke 1987/1979
Mauthausen	Germany	1	EBA	180	Ring	Bad Reichenhall	Lenerz- de Wilde documentation; Menke 1987/1979
Mauthausen	Germany	1	EBA	183	Ring	Bad Reichenhall	Lenerz- de Wilde documentation; Menke 1987/1979
Mauthausen	Germany	1	EBA	197	Ring	Bad Reichenhall	Lenerz- de Wilde documentation; Menke 1987/1979
Mauthausen	Germany	1	EBA	195.5	Ring	Bad Reichenhall	Lenerz- de Wilde documentation; Menke 1987/1979
Mauthausen	Germany	1	EBA	189	Ring	Bad Reichenhall	Lenerz- de Wilde documentation; Menke 1987/1979
Mauthausen	Germany	1	EBA	197	Ring	Bad Reichenhall	Lenerz- de Wilde documentation; Menke 1987/1979
Mauthausen	Germany	1	EBA	191	Ring	Bad Reichenhall	Lenerz- de Wilde documentation; Menke 1987/1979
Mauthausen	Germany	1	EBA	197	Ring	Bad Reichenhall	Lenerz- de Wilde documentation; Menke 1987/1979
Mauthausen	Germany	1	EBA	198	Ring	Bad Reichenhall	Lenerz- de Wilde documentation; Menke 1987/1979
Mauthausen	Germany	1	EBA	197	Ring	Bad Reichenhall	Lenerz- de Wilde documentation; Menke 1987/1979
Mauthausen	Germany	1	EBA	198	Ring	Bad Reichenhall	Lenerz- de Wilde documentation; Menke 1987/1979
Mauthausen	Germany	1	EBA	196.5	Ring	Bad Reichenhall	Lenerz- de Wilde documentation; Menke 1987/1979
Mauthausen	Germany	1	EBA	196	Ring	Bad Reichenhall	Lenerz- de Wilde documentation; Menke 1987/1979
Mauthausen	Germany	1	EBA	195.5	Ring	Bad Reichenhall	Lenerz- de Wilde documentation; Menke 1987/1979
Mauthausen	Germany	1	EBA	195.5	Ring	Bad Reichenhall	Lenerz- de Wilde documentation; Menke 1987/1979
Mauthausen	Germany	1	EBA	195.5	Ring	Bad Reichenhall	Lenerz- de Wilde documentation; Menke 1987/1979
Mauthausen	Germany	1	EBA	195.5	Ring	Bad Reichenhall	Lenerz- de Wilde documentation; Menke 1987/1979
Mauthausen	Germany	1	EBA	197	Ring	Bad Reichenhall	Lenerz- de Wilde documentation; Menke 1987/1979
Mauthausen	Germany	1	EBA	198.5	Ring	Bad Reichenhall	Lenerz- de Wilde documentation; Menke 1987/1979
Mauthausen	Germany	1	EBA	199.5	Ring	Bad Reichenhall	Lenerz- de Wilde documentation; Menke 1987/1979
Mauthausen	Germany	1	EBA	199.5	Ring	Bad Reichenhall	Lenerz- de Wilde documentation; Menke 1987/1979
Mauthausen	Germany	1	EBA	199.5	Ring	Bad Reichenhall	Lenerz- de Wilde documentation; Menke 1987/1979
Mauthausen	Germany	1	EBA	199.5	Ring	Bad Reichenhall	Lenerz- de Wilde documentation; Menke 1987/1979
Mauthausen	Germany	1	EBA	199	Ring	Bad Reichenhall	Lenerz- de Wilde documentation; Menke 1987/1979
Mauthausen	Germany	1	EBA	198	Ring	Bad Reichenhall	Lenerz- de Wilde documentation; Menke 1987/1979
Mauthausen	Germany	1	EBA	199	Ring	Bad Reichenhall	Lenerz- de Wilde documentation; Menke 1987/1979
Mauthausen	Germany	1	EBA	197	Ring	Bad Reichenhall	Lenerz- de Wilde documentation; Menke 1987/1979
Mauthausen	Germany	1	EBA	198.5	Ring	Bad Reichenhall	Lenerz- de Wilde documentation; Menke 1987/1979
Mauthausen	Germany	1	EBA	198.5	Ring	Bad Reichenhall	Lenerz- de Wilde documentation; Menke 1987/1979
Mauthausen	Germany	1	EBA	198	Ring	Bad Reichenhall	Lenerz- de Wilde documentation; Menke 1987/1979
Mauthausen	Germany	1	EBA	198	Ring	Bad Reichenhall	Lenerz- de Wilde documentation; Menke 1987/1979
Mauthausen	Germany	1	EBA	198	Ring	Bad Reichenhall	Lenerz- de Wilde documentation; Menke 1987/1979
Mauthausen	Germany	1	EBA	198	Ring	Bad Reichenhall	Lenerz- de Wilde documentation; Menke 1987/1979
Mauthausen	Germany	1	EBA	199	Ring	Bad Reichenhall	Lenerz- de Wilde documentation; Menke 1987/1979
Mauthausen	Germany	1	EBA	192	Ring	Bad Reichenhall	Lenerz- de Wilde documentation; Menke 1987/1979
Mauthausen	Germany	1	EBA	193	Ring	Bad Reichenhall	Lenerz- de Wilde documentation; Menke 1987/1979
Mauthausen	Germany	1	EBA	193	Ring	Bad Reichenhall	Lenerz- de Wilde documentation; Menke 1987/1979
Mauthausen	Germany	1	EBA	193	Ring	Bad Reichenhall	Lenerz- de Wilde documentation; Menke 1987/1979
Mauthausen	Germany	1	EBA	193	Ring	Bad Reichenhall	Lenerz- de Wilde documentation; Menke 1987/1979
Mauthausen	Germany	1	EBA	192.5	Ring	Bad Reichenhall	Lenerz- de Wilde documentation; Menke 1987/1979
Mauthausen	Germany	1	EBA	193.5	Ring	Bad Reichenhall	Lenerz- de Wilde documentation; Menke 1987/1979
Mauthausen	Germany	1	EBA	192	Ring	Bad Reichenhall	Lenerz- de Wilde documentation; Menke 1987/1979
Mauthausen	Germany	1	EBA	191.5	Ring	Bad Reichenhall	Lenerz- de Wilde documentation; Menke 1987/1979
Mauthausen	Germany	1	EBA	191.5	Ring	Bad Reichenhall	Lenerz- de Wilde documentation; Menke 1987/1979
Mauthausen	Germany	1	EBA	195	Ring	Bad Reichenhall	Lenerz- de Wilde documentation; Menke 1987/1979
Mauthausen	Germany	1	EBA	191.5	Ring	Bad Reichenhall	Lenerz- de Wilde documentation; Menke 1987/1979
Mauthausen	Germany	1	EBA	197.5	Ring	Bad Reichenhall	Lenerz- de Wilde documentation; Menke 1987/1979
Mauthausen	Germany	1	EBA	191.5	Ring	Bad Reichenhall	Lenerz- de Wilde documentation; Menke 1987/1979
Mauthausen	Germany	1	EBA	191	Ring	Bad Reichenhall	Lenerz- de Wilde documentation; Menke 1987/1979
Mauthausen	Germany	1	EBA	192.5	Ring	Bad Reichenhall	Lenerz- de Wilde documentation; Menke 1987/1979
Mauthausen	Germany	1	EBA	195	Ring	Bad Reichenhall	Lenerz- de Wilde documentation; Menke 1987/1979
Mauthausen	Germany	1	EBA	195	Ring	Bad Reichenhall	Lenerz- de Wilde documentation; Menke 1987/1979
Mauthausen	Germany	1	EBA	195	Ring	Bad Reichenhall	Lenerz- de Wilde documentation; Menke 1987/1979
Mauthausen	Germany	1	EBA	195	Ring	Bad Reichenhall	Lenerz- de Wilde documentation; Menke 1987/1979
Mauthausen	Germany	1	EBA	195	Ring	Bad Reichenhall	Lenerz- de Wilde documentation; Menke 1987/1979
Mauthausen	Germany	1	EBA	194.5	Ring	Bad Reichenhall	Lenerz- de Wilde documentation; Menke 1987/1979
Mauthausen	Germany	1	EBA	194.5	Ring	Bad Reichenhall	Lenerz- de Wilde documentation; Menke 1987/1979
Mauthausen	Germany	1	EBA	194.5	Ring	Bad Reichenhall	Lenerz- de Wilde documentation; Menke 1987/1979
Mauthausen	Germany	1	EBA	194	Ring	Bad Reichenhall	Lenerz- de Wilde documentation; Menke 1987/1979
Mauthausen	Germany	1	EBA	194	Ring	Bad Reichenhall	Lenerz- de Wilde documentation; Menke 1987/1979
Mauthausen	Germany	1	EBA	194	Ring	Bad Reichenhall	Lenerz- de Wilde documentation; Menke 1987/1979
Mauthausen	Germany	1	EBA	194	Ring	Bad Reichenhall	Lenerz- de Wilde documentation; Menke 1987/1979
Mauthausen	Germany	1	EBA	194	Ring	Bad Reichenhall	Lenerz- de Wilde documentation; Menke 1987/1979
Mauthausen	Germany	1	EBA	194.5	Ring	Bad Reichenhall	Lenerz- de Wilde documentation; Menke 1987/1979
Mikulov	Czech Republic	1	EBA	210	Ring	Brno	Lenerz- de Wilde documentation
Mikulov	Czech Republic	1	EBA	220	Ring	Brno	Lenerz- de Wilde documentation
Mikulov	Czech Republic	1	EBA	210	Ring	Brno	Lenerz- de Wilde documentation
Mikulov	Czech Republic	1	EBA	200	Ring	Brno	Lenerz- de Wilde documentation
Mikulov	Czech Republic	1	EBA	170	Ring	Brno	Lenerz- de Wilde documentation
Mikulov	Czech Republic	1	EBA	200	Ring	Brno	Lenerz- de Wilde documentation
Mikulov	Czech Republic	1	EBA	205	Ring	Brno	Lenerz- de Wilde documentation
Mikulov	Czech Republic	1	EBA	210	Ring	Brno	Lenerz- de Wilde documentation
Mikulov	Czech Republic	1	EBA	205	Ring	Brno	Lenerz- de Wilde documentation
Mikulov	Czech Republic	1	EBA	205	Ring	Brno	Lenerz- de Wilde documentation
Mikulov	Czech Republic	1	EBA	210	Ring	Brno	Lenerz- de Wilde documentation
Mikulov	Czech Republic	1	EBA	200	Ring	Brno	Lenerz- de Wilde documentation
Mikulov	Czech Republic	1	EBA	210	Ring	Brno	Lenerz- de Wilde documentation
Mikulov	Czech Republic	1	EBA	225	Ring	Brno	Lenerz- de Wilde documentation
Mikulov	Czech Republic	1	EBA	205	Ring	Brno	Lenerz- de Wilde documentation
Mikulov	Czech Republic	1	EBA	200	Ring	Brno	Lenerz- de Wilde documentation
Mikulov	Czech Republic	1	EBA	205	Ring	Brno	Lenerz- de Wilde documentation
Mikulov	Czech Republic	1	EBA	205	Ring	Brno	Lenerz- de Wilde documentation
Mikulov	Czech Republic	1	EBA	195	Ring	Brno	Lenerz- de Wilde documentation
Mikulov	Czech Republic	1	EBA	210	Ring	Brno	Lenerz- de Wilde documentation
Mikulov	Czech Republic	1	EBA	205	Ring	Brno	Lenerz- de Wilde documentation
Mikulov	Czech Republic	1	EBA	207	Ring	Brno	Lenerz- de Wilde documentation
Mikulov	Czech Republic	1	EBA	205	Ring	Brno	Lenerz- de Wilde documentation
Mikulov	Czech Republic	1	EBA	195	Ring	Brno	Lenerz- de Wilde documentation
Mikulov	Czech Republic	1	EBA	210	Ring	Brno	Lenerz- de Wilde documentation
Mikulov	Czech Republic	1	EBA	210	Ring	Brno	Lenerz- de Wilde documentation
Mikulov	Czech Republic	1	EBA	210	Ring	Brno	Lenerz- de Wilde documentation
Milevsko	Czech Republic	1	EBA	180	Ring	Prague ARÚ	Moucha 2005
Milevsko	Czech Republic	1	EBA	190	Ring	Prague ARÚ	Moucha 2005
Mittermühle (Mainburg)	Germany	1	EBA	66	Rib	Munich	Lenerz- de Wilde documentation
Mittermühle (Mainburg)	Germany	1	EBA	62	Rib	Munich	Lenerz- de Wilde documentation
Mittermühle (Mainburg)	Germany	1	EBA	52	Rib	Munich	Lenerz- de Wilde documentation
Mittermühle (Mainburg)	Germany	1	EBA	52	Rib	Munich	Lenerz- de Wilde documentation
Mittermühle (Mainburg)	Germany	1	EBA	87	Rib	Munich	Lenerz- de Wilde documentation
Mittermühle (Mainburg)	Germany	1	EBA	70	Rib	Munich	Lenerz- de Wilde documentation
Mittermühle (Mainburg)	Germany	1	EBA	62	Rib	Munich	Lenerz- de Wilde documentation
Mittermühle (Mainburg)	Germany	1	EBA	69	Rib	Munich	Lenerz- de Wilde documentation
Mittermühle (Mainburg)	Germany	1	EBA	63	Rib	Munich	Lenerz- de Wilde documentation
Mittermühle (Mainburg)	Germany	1	EBA	63	Rib	Munich	Lenerz- de Wilde documentation
Mittermühle (Mainburg)	Germany	1	EBA	67	Rib	Munich	Lenerz- de Wilde documentation
Mittermühle (Mainburg)	Germany	1	EBA	63	Rib	Munich	Lenerz- de Wilde documentation
Mittermühle (Mainburg)	Germany	1	EBA	57	Rib	Munich	Lenerz- de Wilde documentation
Mittermühle (Mainburg)	Germany	1	EBA	57	Rib	Munich	Lenerz- de Wilde documentation
Mittermühle (Mainburg)	Germany	1	EBA	66	Rib	Munich	Lenerz- de Wilde documentation
Mladé	Czech Republic	1	EBA	218	Ring	České Budějovice	Lenerz- de Wilde documentation
Mladé	Czech Republic	1	EBA	145	Ring	České Budějovice	Lenerz- de Wilde documentation
Mladé	Czech Republic	1	EBA	137	Ring	České Budějovice	Lenerz- de Wilde documentation
Mladé	Czech Republic	1	EBA	145	Ring	České Budějovice	Lenerz- de Wilde documentation
Mladé	Czech Republic	1	EBA	210	Ring	České Budějovice	Lenerz- de Wilde documentation
Mladé	Czech Republic	1	EBA	206	Ring	České Budějovice	Lenerz- de Wilde documentation
Mladé	Czech Republic	1	EBA	219	Ring	České Budějovice	Lenerz- de Wilde documentation
Mladé	Czech Republic	1	EBA	201	Ring	České Budějovice	Lenerz- de Wilde documentation
Mondsee	Austria	1	EBA	158	Ring	Vienna	Lenerz- de Wilde documentation
Mondsee	Austria	1	EBA	164	Ring	Vienna	Lenerz- de Wilde documentation
Mondsee	Austria	1	EBA	155	Ring	Vienna	Lenerz- de Wilde documentation
Mondsee	Austria	1	EBA	163	Ring	Vienna	Lenerz- de Wilde documentation
Mondsee	Austria	1	EBA	151	Ring	Vienna	Lenerz- de Wilde documentation
München-Luitpoldpark	Germany	1	EBA	217	Rib	Munich	Lenerz- de Wilde documentation
München-Luitpoldpark	Germany	1	EBA	166	Rib	Munich	Lenerz- de Wilde documentation
München-Luitpoldpark	Germany	1	EBA	178	Rib	Munich	Lenerz- de Wilde documentation
München-Luitpoldpark	Germany	1	EBA	169	Rib	Munich	Lenerz- de Wilde documentation
München-Luitpoldpark	Germany	1	EBA	192	Rib	Munich	Lenerz- de Wilde documentation
München-Luitpoldpark	Germany	1	EBA	176	Rib	Munich	Lenerz- de Wilde documentation
München-Luitpoldpark	Germany	1	EBA	199	Rib	Munich	Lenerz- de Wilde documentation
München-Luitpoldpark	Germany	1	EBA	195	Rib	Munich	Lenerz- de Wilde documentation
München-Luitpoldpark	Germany	1	EBA	180	Rib	Munich	Lenerz- de Wilde documentation
München-Luitpoldpark	Germany	1	EBA	170	Rib	Munich	Lenerz- de Wilde documentation
München-Luitpoldpark	Germany	1	EBA	189	Rib	Munich	Lenerz- de Wilde documentation
München-Luitpoldpark	Germany	1	EBA	201	Rib	Munich	Lenerz- de Wilde documentation
München-Luitpoldpark	Germany	1	EBA	167	Rib	Munich	Lenerz- de Wilde documentation
München-Luitpoldpark	Germany	1	EBA	187	Rib	Munich	Lenerz- de Wilde documentation
München-Luitpoldpark	Germany	1	EBA	159	Rib	Munich	Lenerz- de Wilde documentation
München-Luitpoldpark	Germany	1	EBA	190	Rib	Munich	Lenerz- de Wilde documentation
München-Luitpoldpark	Germany	1	EBA	201	Rib	Munich	Lenerz- de Wilde documentation
München-Luitpoldpark	Germany	1	EBA	194	Rib	Munich	Lenerz- de Wilde documentation
München-Luitpoldpark	Germany	1	EBA	161	Rib	Munich	Lenerz- de Wilde documentation
München-Luitpoldpark	Germany	1	EBA	187	Rib	Munich	Lenerz- de Wilde documentation
München-Luitpoldpark	Germany	1	EBA	172	Rib	Munich	Lenerz- de Wilde documentation
München-Luitpoldpark	Germany	1	EBA	195	Rib	Munich	Lenerz- de Wilde documentation
München-Luitpoldpark	Germany	1	EBA	143	Rib	Munich	Lenerz- de Wilde documentation
München-Luitpoldpark	Germany	1	EBA	160	Rib	Munich	Lenerz- de Wilde documentation
München-Luitpoldpark	Germany	1	EBA	178	Rib	Munich	Lenerz- de Wilde documentation
München-Luitpoldpark	Germany	1	EBA	189	Rib	Munich	Lenerz- de Wilde documentation
München-Luitpoldpark	Germany	1	EBA	208	Rib	Munich	Lenerz- de Wilde documentation
München-Luitpoldpark	Germany	1	EBA	176	Rib	Munich	Lenerz- de Wilde documentation
München-Luitpoldpark	Germany	1	EBA	194	Rib	Munich	Lenerz- de Wilde documentation
München-Luitpoldpark	Germany	1	EBA	176	Rib	Munich	Lenerz- de Wilde documentation
München-Luitpoldpark	Germany	1	EBA	172	Rib	Munich	Lenerz- de Wilde documentation
München-Luitpoldpark	Germany	1	EBA	188	Rib	Munich	Lenerz- de Wilde documentation
München-Luitpoldpark	Germany	1	EBA	200	Rib	Munich	Lenerz- de Wilde documentation
München-Luitpoldpark	Germany	1	EBA	185	Rib	Munich	Lenerz- de Wilde documentation
München-Luitpoldpark	Germany	1	EBA	180	Rib	Munich	Lenerz- de Wilde documentation
München-Luitpoldpark	Germany	1	EBA	201	Rib	Munich	Lenerz- de Wilde documentation
München-Luitpoldpark	Germany	1	EBA	185	Rib	Munich	Lenerz- de Wilde documentation
München-Luitpoldpark	Germany	1	EBA	203	Rib	Munich	Lenerz- de Wilde documentation
München-Luitpoldpark	Germany	1	EBA	172	Rib	Munich	Lenerz- de Wilde documentation
München-Luitpoldpark	Germany	1	EBA	183	Rib	Munich	Lenerz- de Wilde documentation
München-Luitpoldpark	Germany	1	EBA	181	Rib	Munich	Lenerz- de Wilde documentation
München-Luitpoldpark	Germany	1	EBA	168	Rib	Munich	Lenerz- de Wilde documentation
München-Luitpoldpark	Germany	1	EBA	199	Rib	Munich	Lenerz- de Wilde documentation
München-Luitpoldpark	Germany	1	EBA	183	Rib	Munich	Lenerz- de Wilde documentation
München-Luitpoldpark	Germany	1	EBA	139	Rib	Munich	Lenerz- de Wilde documentation
München-Luitpoldpark	Germany	1	EBA	187	Rib	Munich	Lenerz- de Wilde documentation
München-Luitpoldpark	Germany	1	EBA	149	Rib	Munich	Lenerz- de Wilde documentation
München-Luitpoldpark	Germany	1	EBA	157	Rib	Munich	Lenerz- de Wilde documentation
München-Luitpoldpark	Germany	1	EBA	147	Rib	Munich	Lenerz- de Wilde documentation
München-Luitpoldpark	Germany	1	EBA	183	Rib	Munich	Lenerz- de Wilde documentation
München-Luitpoldpark	Germany	1	EBA	188	Rib	Munich	Lenerz- de Wilde documentation
München-Luitpoldpark	Germany	1	EBA	211	Rib	Munich	Lenerz- de Wilde documentation
München-Luitpoldpark	Germany	1	EBA	185	Rib	Munich	Lenerz- de Wilde documentation
München-Luitpoldpark	Germany	1	EBA	194	Rib	Munich	Lenerz- de Wilde documentation
München-Luitpoldpark	Germany	1	EBA	195	Rib	Munich	Lenerz- de Wilde documentation
München-Luitpoldpark	Germany	1	EBA	185	Rib	Munich	Lenerz- de Wilde documentation
München-Luitpoldpark	Germany	1	EBA	183	Rib	Munich	Lenerz- de Wilde documentation
München-Luitpoldpark	Germany	1	EBA	189	Rib	Munich	Lenerz- de Wilde documentation
München-Luitpoldpark	Germany	1	EBA	201	Rib	Munich	Lenerz- de Wilde documentation
München-Luitpoldpark	Germany	1	EBA	190	Rib	Munich	Lenerz- de Wilde documentation
München-Luitpoldpark	Germany	1	EBA	163	Rib	Munich	Lenerz- de Wilde documentation
München-Luitpoldpark	Germany	1	EBA	194	Rib	Munich	Lenerz- de Wilde documentation
München-Luitpoldpark	Germany	1	EBA	173	Rib	Munich	Lenerz- de Wilde documentation
München-Luitpoldpark	Germany	1	EBA	172	Rib	Munich	Lenerz- de Wilde documentation
München-Luitpoldpark	Germany	1	EBA	170	Rib	Munich	Lenerz- de Wilde documentation
München-Luitpoldpark	Germany	1	EBA	170	Rib	Munich	Lenerz- de Wilde documentation
München-Luitpoldpark	Germany	1	EBA	152	Rib	Munich	Lenerz- de Wilde documentation
München-Luitpoldpark	Germany	1	EBA	170	Rib	Munich	Lenerz- de Wilde documentation
München-Luitpoldpark	Germany	1	EBA	184	Rib	Munich	Lenerz- de Wilde documentation
München-Luitpoldpark	Germany	1	EBA	181	Rib	Munich	Lenerz- de Wilde documentation
München-Luitpoldpark	Germany	1	EBA	195	Rib	Munich	Lenerz- de Wilde documentation
München-Luitpoldpark	Germany	1	EBA	165	Rib	Munich	Lenerz- de Wilde documentation
München-Luitpoldpark	Germany	1	EBA	205	Rib	Munich	Lenerz- de Wilde documentation
München-Luitpoldpark	Germany	1	EBA	192	Rib	Munich	Lenerz- de Wilde documentation
München-Luitpoldpark	Germany	1	EBA	175	Rib	Munich	Lenerz- de Wilde documentation
München-Luitpoldpark	Germany	1	EBA	199	Rib	Munich	Lenerz- de Wilde documentation
München-Luitpoldpark	Germany	1	EBA	168	Rib	Munich	Lenerz- de Wilde documentation
München-Luitpoldpark	Germany	1	EBA	162	Rib	Munich	Lenerz- de Wilde documentation
München-Luitpoldpark	Germany	1	EBA	181	Rib	Munich	Lenerz- de Wilde documentation
München-Luitpoldpark	Germany	1	EBA	191	Rib	Munich	Lenerz- de Wilde documentation
München-Luitpoldpark	Germany	1	EBA	198	Rib	Munich	Lenerz- de Wilde documentation
München-Luitpoldpark	Germany	1	EBA	185	Rib	Munich	Lenerz- de Wilde documentation
München-Luitpoldpark	Germany	1	EBA	204	Rib	Munich	Lenerz- de Wilde documentation
München-Luitpoldpark	Germany	1	EBA	185	Rib	Munich	Lenerz- de Wilde documentation
München-Luitpoldpark	Germany	1	EBA	186	Rib	Munich	Lenerz- de Wilde documentation
München-Luitpoldpark	Germany	1	EBA	179	Rib	Munich	Lenerz- de Wilde documentation
München-Luitpoldpark	Germany	1	EBA	198	Rib	Munich	Lenerz- de Wilde documentation
München-Luitpoldpark	Germany	1	EBA	167	Rib	Munich	Lenerz- de Wilde documentation
München-Luitpoldpark	Germany	1	EBA	159	Rib	Munich	Lenerz- de Wilde documentation
München-Luitpoldpark	Germany	1	EBA	172	Rib	Munich	Lenerz- de Wilde documentation
München-Luitpoldpark	Germany	1	EBA	184	Rib	Munich	Lenerz- de Wilde documentation
München-Luitpoldpark	Germany	1	EBA	187	Rib	Munich	Lenerz- de Wilde documentation
München-Luitpoldpark	Germany	1	EBA	183	Rib	Munich	Lenerz- de Wilde documentation
München-Luitpoldpark	Germany	1	EBA	184	Rib	Munich	Lenerz- de Wilde documentation
München-Luitpoldpark	Germany	1	EBA	164	Rib	Munich	Lenerz- de Wilde documentation
München-Luitpoldpark	Germany	1	EBA	174	Rib	Munich	Lenerz- de Wilde documentation
München-Luitpoldpark	Germany	1	EBA	206	Rib	Munich	Lenerz- de Wilde documentation
München-Luitpoldpark	Germany	1	EBA	171	Rib	Munich	Lenerz- de Wilde documentation
München-Luitpoldpark	Germany	1	EBA	195	Rib	Munich	Lenerz- de Wilde documentation
München-Luitpoldpark	Germany	1	EBA	129	Rib	Munich	Lenerz- de Wilde documentation
München-Luitpoldpark	Germany	1	EBA	171	Rib	Munich	Lenerz- de Wilde documentation
München-Luitpoldpark	Germany	1	EBA	157	Rib	Munich	Lenerz- de Wilde documentation
München-Luitpoldpark	Germany	1	EBA	183	Rib	Munich	Lenerz- de Wilde documentation
München-Luitpoldpark	Germany	1	EBA	176	Rib	Munich	Lenerz- de Wilde documentation
München-Luitpoldpark	Germany	1	EBA	168	Rib	Munich	Lenerz- de Wilde documentation
München-Luitpoldpark	Germany	1	EBA	187	Rib	Munich	Lenerz- de Wilde documentation
München-Luitpoldpark	Germany	1	EBA	165	Rib	Munich	Lenerz- de Wilde documentation
München-Luitpoldpark	Germany	1	EBA	184	Rib	Munich	Lenerz- de Wilde documentation
München-Luitpoldpark	Germany	1	EBA	185	Rib	Munich	Lenerz- de Wilde documentation
München-Luitpoldpark	Germany	1	EBA	173	Rib	Munich	Lenerz- de Wilde documentation
München-Luitpoldpark	Germany	1	EBA	187	Rib	Munich	Lenerz- de Wilde documentation
München-Luitpoldpark	Germany	1	EBA	183	Rib	Munich	Lenerz- de Wilde documentation
München-Luitpoldpark	Germany	1	EBA	187	Rib	Munich	Lenerz- de Wilde documentation
München-Luitpoldpark	Germany	1	EBA	209	Rib	Munich	Lenerz- de Wilde documentation
München-Luitpoldpark	Germany	1	EBA	193	Rib	Munich	Lenerz- de Wilde documentation
München-Luitpoldpark	Germany	1	EBA	147	Rib	Munich	Lenerz- de Wilde documentation
München-Luitpoldpark	Germany	1	EBA	167	Rib	Munich	Lenerz- de Wilde documentation
München-Luitpoldpark	Germany	1	EBA	172	Rib	Munich	Lenerz- de Wilde documentation
München-Luitpoldpark	Germany	1	EBA	175	Rib	Munich	Lenerz- de Wilde documentation
München-Luitpoldpark	Germany	1	EBA	192	Rib	Munich	Lenerz- de Wilde documentation
München-Luitpoldpark	Germany	1	EBA	169	Rib	Munich	Lenerz- de Wilde documentation
München-Luitpoldpark	Germany	1	EBA	187	Rib	Munich	Lenerz- de Wilde documentation
München-Luitpoldpark	Germany	1	EBA	194	Rib	Munich	Lenerz- de Wilde documentation
München-Luitpoldpark	Germany	1	EBA	193	Rib	Munich	Lenerz- de Wilde documentation
München-Luitpoldpark	Germany	1	EBA	195	Rib	Munich	Lenerz- de Wilde documentation
München-Luitpoldpark	Germany	1	EBA	183	Rib	Munich	Lenerz- de Wilde documentation
München-Luitpoldpark	Germany	1	EBA	226	Rib	Munich	Lenerz- de Wilde documentation
München-Luitpoldpark	Germany	1	EBA	186	Rib	Munich	Lenerz- de Wilde documentation
München-Luitpoldpark	Germany	1	EBA	178	Rib	Munich	Lenerz- de Wilde documentation
München-Luitpoldpark	Germany	1	EBA	172	Rib	Munich	Lenerz- de Wilde documentation
München-Luitpoldpark	Germany	1	EBA	163	Rib	Munich	Lenerz- de Wilde documentation
München-Luitpoldpark	Germany	1	EBA	234	Rib	Munich	Lenerz- de Wilde documentation
München-Luitpoldpark	Germany	1	EBA	153	Rib	Munich	Lenerz- de Wilde documentation
München-Luitpoldpark	Germany	1	EBA	128	Rib	Munich	Lenerz- de Wilde documentation
München-Luitpoldpark	Germany	1	EBA	184	Rib	Munich	Lenerz- de Wilde documentation
München-Luitpoldpark	Germany	1	EBA	190	Rib	Munich	Lenerz- de Wilde documentation
München-Luitpoldpark	Germany	1	EBA	187	Rib	Munich	Lenerz- de Wilde documentation
München-Luitpoldpark	Germany	1	EBA	200	Rib	Munich	Lenerz- de Wilde documentation
München-Luitpoldpark	Germany	1	EBA	178	Rib	Munich	Lenerz- de Wilde documentation
München-Luitpoldpark	Germany	1	EBA	221	Rib	Munich	Lenerz- de Wilde documentation
München-Luitpoldpark	Germany	1	EBA	165	Rib	Munich	Lenerz- de Wilde documentation
München-Luitpoldpark	Germany	1	EBA	203	Rib	Munich	Lenerz- de Wilde documentation
München-Luitpoldpark	Germany	1	EBA	181	Rib	Munich	Lenerz- de Wilde documentation
[truncated: 2,420 more rows]

## Sheet: Axe blades
Hoard	Country	Zone	Date	Weigth (g)	Type	Museum	Inventory No	Source	Literature No
Börhingen-Rickelshausen	Germany	1	EBA I	140	RLB Salez	Freiburg	72	Kienlin 2008	PBFIX04-68, MK 17
Börhingen-Rickelshausen	Germany	1	EBA I	150	RLB Salez	Hegau-Singen	70	Kienlin 2008	PBFIX04-5
Börhingen-Rickelshausen	Germany	1	EBA I	155	RLB Salez	Hegau-Singen	70	Kienlin 2008	PBFIX04-6
Börhingen-Rickelshausen	Germany	1	EBA I	155	RLB Salez	Hegau-Singen	70	Kienlin 2008	PBFIX04-9
Börhingen-Rickelshausen	Germany	1	EBA I	220	RLB Salez	Freiburg	72	Kienlin 2008	PBFIX04-65, MK 16
Bresinchen	Germany	2	EBA II	198	RLB Saxon	Potsdam	1954: 15/15	Breddin 1969	VMP5-15
Bresinchen	Germany	2	EBA II	264	RLB Saxon	Potsdam	1954: 15/16	Breddin 1969	VMP5-16
Bresinchen	Germany	2	EBA II	175	RLB Saxon	Potsdam	1954: 15/13	Breddin 1969	VMP5-13
Bresinchen	Germany	2	EBA II	145	RLB Saxon	Potsdam	1954: 15/5	Breddin 1969	VMP5-5
Bresinchen	Germany	2	EBA II	206	RLB Saxon	Potsdam	1954: 15/12	Breddin 1969	VMP5-12
Bresinchen	Germany	2	EBA II	117	RLB Saxon	Potsdam	1954: 15/11	Breddin 1969	VMP5-11
Bresinchen	Germany	2	EBA II	182	RLB Saxon	Potsdam	1954: 15/10	Breddin 1969	VMP5-10
Bresinchen	Germany	2	EBA II	196	RLB Saxon	Potsdam	1954: 15/9	Breddin 1969	VMP5-9
Bresinchen	Germany	2	EBA II	145	RLB Saxon	Potsdam	1954: 15/8	Breddin 1969	VMP5-8
Bresinchen	Germany	2	EBA II	138	RLB Saxon	Potsdam	1954: 15/7	Breddin 1969	VMP5-7
Bresinchen	Germany	2	EBA II	162	RLB Saxon	Potsdam	1954: 15/14	Breddin 1969	VMP5-14
Bresinchen	Germany	2	EBA II	169	RLB Saxon	Potsdam	1954: 15/17	Breddin 1969	VMP5-17
Bresinchen	Germany	2	EBA II	143	RLB Saxon	Potsdam	1954: 15/90	Breddin 1969	VMP5-90
Bresinchen	Germany	2	EBA II	174	RLB Saxon	Potsdam	1954: 15/19	Breddin 1969	VMP5-19
Bresinchen	Germany	2	EBA II	177	RLB Saxon	Potsdam	1954: 15/37	Breddin 1969	VMP5-37
Bresinchen	Germany	2	EBA II	160	RLB Saxon	Potsdam	1954: 15/21	Breddin 1969	VMP5-21
Bresinchen	Germany	2	EBA II	203	RLB Saxon	Potsdam	1954: 15/22	Breddin 1969	VMP5-22
Bresinchen	Germany	2	EBA II	185	RLB Saxon	Potsdam	1954: 15/23	Breddin 1969	VMP5-23
Bresinchen	Germany	2	EBA II	196	RLB Saxon	Potsdam	1954: 15/33	Breddin 1969	VMP5-33
Bresinchen	Germany	2	EBA II	201	RLB Saxon	Potsdam	1954: 15/32	Breddin 1969	VMP5-32
Bresinchen	Germany	2	EBA II	157	RLB Saxon	Potsdam	1954: 15/93	Breddin 1969	VMP5-93
Bresinchen	Germany	2	EBA II	167	RLB Saxon	Potsdam	1954: 15/92	Breddin 1969	VMP5-92
Bresinchen	Germany	2	EBA II	163	RLB Saxon	Potsdam	1954: 15/91	Breddin 1969	VMP5-91
Bresinchen	Germany	2	EBA II	182	RLB Saxon	Potsdam	1954: 15/35	Breddin 1969	VMP5-35
Bresinchen	Germany	2	EBA II	176	RLB Saxon	Potsdam	1954: 15/104	Breddin 1969	VMP5-104
Bresinchen	Germany	2	EBA II	155	RLB Saxon	Potsdam	1954: 15/3	Breddin 1969	VMP5-3
Bresinchen	Germany	2	EBA II	132	RLB Saxon	Potsdam	1954: 15/4	Breddin 1969	VMP5-4
Bresinchen	Germany	2	EBA II	176	RLB Saxon	Potsdam	1954: 15/95	Breddin 1969	VMP5-95
Bresinchen	Germany	2	EBA II	145	RLB Saxon	Potsdam	1954: 15/96	Breddin 1969	VMP5-96
Bresinchen	Germany	2	EBA II	237	RLB Saxon	Potsdam	1954: 15/97	Breddin 1969	VMP5-97
Bresinchen	Germany	2	EBA II	220	RLB Saxon	Potsdam	1954: 15/98	Breddin 1969	VMP5-98
Bresinchen	Germany	2	EBA II	137	RLB Saxon	Potsdam	1954: 15/99	Breddin 1969	VMP5-99
Bresinchen	Germany	2	EBA II	235	RLB Saxon	Potsdam	1954: 15/36	Breddin 1969	VMP5-36
Bresinchen	Germany	2	EBA II	143	RLB Saxon	Potsdam	1954: 15/100	Breddin 1969	VMP5-100
Bresinchen	Germany	2	EBA II	258	RLB Saxon	Potsdam	1954: 15/31	Breddin 1969	VMP5-31
Bresinchen	Germany	2	EBA II	183	RLB Saxon	Potsdam	1954: 15/101	Breddin 1969	VMP5-101
Bresinchen	Germany	2	EBA II	214	RLB Saxon	Potsdam	1954: 15/47	Breddin 1969	VMP5-47
Bresinchen	Germany	2	EBA II	183	RLB Saxon	Potsdam	1954: 15/6	Breddin 1969	VMP5-6
Bresinchen	Germany	2	EBA II	179	RLB Saxon	Potsdam	1954: 15/103	Breddin 1969	VMP5-103
Bresinchen	Germany	2	EBA II	196	RLB Saxon	Potsdam	1954: 15/94	Breddin 1969	VMP5-94
Bresinchen	Germany	2	EBA II	82	RLB Saxon	Potsdam	1954: 15/105	Breddin 1969	VMP5-105
Bresinchen	Germany	2	EBA II	167	RLB Saxon	Potsdam	1954: 15/46	Breddin 1969	VMP5-46
Bresinchen	Germany	2	EBA II	167	RLB Saxon	Potsdam	1954: 15/45	Breddin 1969	VMP5-45
Bresinchen	Germany	2	EBA II	235	RLB Saxon	Potsdam	1954: 15/44	Breddin 1969	VMP5-44
Bresinchen	Germany	2	EBA II	155	RLB Saxon	Potsdam	1954: 15/43	Breddin 1969	VMP5-43
Bresinchen	Germany	2	EBA II	176	RLB Saxon	Potsdam	1954: 15/42	Breddin 1969	VMP5-42
Bresinchen	Germany	2	EBA II	187	RLB Saxon	Potsdam	1954: 15/41	Breddin 1969	VMP5-41
Bresinchen	Germany	2	EBA II	210	RLB Saxon	Potsdam	1954: 15/34	Breddin 1969	VMP5-34
Bresinchen	Germany	2	EBA II	136	RLB Saxon	Potsdam	1954: 15/40	Breddin 1969	VMP5-40
Bresinchen	Germany	2	EBA II	212	RLB Saxon	Potsdam	1954: 15/39	Breddin 1969	VMP5-39
Bresinchen	Germany	2	EBA II	186	RLB Saxon	Potsdam	1954: 15/38	Breddin 1969	VMP5-38
Bresinchen	Germany	2	EBA II	179	RLB Saxon	Potsdam	1954: 15/20	Breddin 1969	VMP5-20
Bresinchen	Germany	2	EBA II	168	RLB Saxon	Potsdam	1954: 15/102	Breddin 1969	VMP5-102
Bresinchen	Germany	2	EBA II	108	RLB Saxon	Potsdam	1954: 15/18	Breddin 1969	VMP5-18
Bresinchen	Germany	2	EBA II	145	RLB Saxon	Potsdam	1954: 15/64	Breddin 1969	VMP5-64
Bresinchen	Germany	2	EBA II	250	RLB Saxon	Potsdam	1954: 15/63	Breddin 1969	VMP5-63
Bresinchen	Germany	2	EBA II	168	RLB Saxon	Potsdam	1954: 15/62	Breddin 1969	VMP5-62
Bresinchen	Germany	2	EBA II	165	RLB Saxon	Potsdam	1954: 15/61	Breddin 1969	VMP5-61
Bresinchen	Germany	2	EBA II	183	RLB Saxon	Potsdam	1954: 15/60	Breddin 1969	VMP5-60
Bresinchen	Germany	2	EBA II	203	RLB Saxon	Potsdam	1954: 15/59	Breddin 1969	VMP5-59
Bresinchen	Germany	2	EBA II	248	RLB Saxon	Potsdam	1954: 15/24	Breddin 1969	VMP5-24
Bresinchen	Germany	2	EBA II	165	RLB Saxon	Potsdam	1954: 15/25	Breddin 1969	VMP5-25
Bresinchen	Germany	2	EBA II	193	RLB Saxon	Potsdam	1954: 15/26	Breddin 1969	VMP5-26
Bresinchen	Germany	2	EBA II	142	RLB Saxon	Potsdam	1954: 15/27	Breddin 1969	VMP5-27
Bresinchen	Germany	2	EBA II	170	RLB Saxon	Potsdam	1954: 15/65	Breddin 1969	VMP5-65
Bresinchen	Germany	2	EBA II	161	RLB Saxon	Potsdam	1954: 15/29	Breddin 1969	VMP5-29
Bresinchen	Germany	2	EBA II	150	RLB Saxon	Potsdam	1954: 15/28	Breddin 1969	VMP5-28
Bresinchen	Germany	2	EBA II	262	RLB Saxon	Potsdam	1954: 15/58	Breddin 1969	VMP5-58
Bresinchen	Germany	2	EBA II	158	RLB Saxon	Potsdam	1954: 15/357	Breddin 1969	VMP5-57
Bresinchen	Germany	2	EBA II	220	RLB Saxon	Potsdam	1954: 15/56	Breddin 1969	VMP5-56
Bresinchen	Germany	2	EBA II	167	RLB Saxon	Potsdam	1954: 15/55	Breddin 1969	VMP5-55
Bresinchen	Germany	2	EBA II	157	RLB Saxon	Potsdam	1954: 15/54	Breddin 1969	VMP5-54
Bresinchen	Germany	2	EBA II	176	RLB Saxon	Potsdam	1954: 15/53	Breddin 1969	VMP5-53
Bresinchen	Germany	2	EBA II	193	RLB Saxon	Potsdam	1954: 15/52	Breddin 1969	VMP5-52
Bresinchen	Germany	2	EBA II	156	RLB Saxon	Potsdam	1954: 15/51	Breddin 1969	VMP5-51
Bresinchen	Germany	2	EBA II	217	RLB Saxon	Potsdam	1954: 15/50	Breddin 1969	VMP5-50
Bresinchen	Germany	2	EBA II	198	RLB Saxon	Potsdam	1954: 15/49	Breddin 1969	VMP5-49
Bresinchen	Germany	2	EBA II	187	RLB Saxon	Potsdam	1954: 15/48	Breddin 1969	VMP5-48
Bresinchen	Germany	2	EBA II	110	RLB Saxon	Potsdam	1954: 15/89	Breddin 1969	VMP5-89
Bresinchen	Germany	2	EBA II	184	RLB Saxon	Potsdam	1954: 15/81	Breddin 1969	VMP5-81
Bresinchen	Germany	2	EBA II	131	RLB Saxon	Potsdam	1954: 15/30	Breddin 1969	VMP5-30
Bresinchen	Germany	2	EBA II	169	RLB Saxon	Potsdam	1954: 15/82	Breddin 1969	VMP5-82
Bresinchen	Germany	2	EBA II	223	RLB Saxon	Potsdam	1954: 15/66	Breddin 1969	VMP5-66
Bresinchen	Germany	2	EBA II	121	RLB Saxon	Potsdam	1954: 15/83	Breddin 1969	VMP5-83
Bresinchen	Germany	2	EBA II	185	RLB Saxon	Potsdam	1954: 15/84	Breddin 1969	VMP5-84
Bresinchen	Germany	2	EBA II	221	RLB Saxon	Potsdam	1954: 15/85	Breddin 1969	VMP5-85
Bresinchen	Germany	2	EBA II	140	RLB Saxon	Potsdam	1954: 15/86	Breddin 1969	VMP5-86
Bresinchen	Germany	2	EBA II	199	RLB Saxon	Potsdam	1954: 15/87	Breddin 1969	VMP5-87
Bresinchen	Germany	2	EBA II	147	RLB Saxon	Potsdam	1954: 15/88	Breddin 1969	VMP5-88
Bresinchen	Germany	2	EBA II	222	RLB Saxon	Potsdam	1954: 15/80	Breddin 1969	VMP5-80
Bresinchen	Germany	2	EBA II	99	RLB Saxon	Potsdam	1954: 15/79	Breddin 1969	VMP5-79
Bresinchen	Germany	2	EBA II	166	RLB Saxon	Potsdam	1954: 15/71	Breddin 1969	VMP5-71
Bresinchen	Germany	2	EBA II	257	RLB Saxon	Potsdam	1954: 15/67	Breddin 1969	VMP5-67
Bresinchen	Germany	2	EBA II	168	RLB Saxon	Potsdam	1954: 15/68	Breddin 1969	VMP5-68
Bresinchen	Germany	2	EBA II	173	RLB Saxon	Potsdam	1954: 15/70	Breddin 1969	VMP5-70
Bresinchen	Germany	2	EBA II	242	RLB Saxon	Potsdam	1954: 15/78	Breddin 1969	VMP5-78
Bresinchen	Germany	2	EBA II	184	RLB Saxon	Potsdam	1954: 15/72	Breddin 1969	VMP5-72
Bresinchen	Germany	2	EBA II	180	RLB Saxon	Potsdam	1954: 15/73	Breddin 1969	VMP5-73
Bresinchen	Germany	2	EBA II	87	RLB Saxon	Potsdam	1954: 15/74	Breddin 1969	VMP5-74
Bresinchen	Germany	2	EBA II	170	RLB Saxon	Potsdam	1954: 15/77	Breddin 1969	VMP5-77
Bresinchen	Germany	2	EBA II	163	RLB Saxon	Potsdam	1954: 15/75	Breddin 1969	VMP5-75
Bresinchen	Germany	2	EBA II	236	RLB Saxon	Potsdam	1954: 15/76	Breddin 1969	VMP5-76
Bresinchen	Germany	2	EBA II	151	RLB Saxon	Potsdam	1954: 15/69	Breddin 1969	VMP5-69
Bühl im Ries	Germany	1	MBA	290	RLB	Nördlingen	NA	Abels 1972	PBFIX20-220
Bühl im Ries	Germany	1	MBA	200	RLB	Nördlingen	NA	Abels 1972	PBFIX20-232
Bühl im Ries	Germany	1	MBA	390	RLB	Nördlingen	NA	Abels 1972	PBFIX20-219
Carsdorf (Pegau)	Germany	2	EBA II	203	RLB Saxon	Leipzig	V2398	Own measurements	Billig 1958, 48:6
Carsdorf (Pegau)	Germany	2	EBA II	210	RLB Saxon	Leipzig	V2393	Own measurements	Billig 1958, 48:7
Carsdorf (Pegau)	Germany	2	EBA II	227	RLB Saxon	Leipzig	V2386	Own measurements	Billig 1958, 48:8
Carsdorf (Pegau)	Germany	2	EBA II	270	RLB Saxon	Leipzig	V2391	Own measurements	Billig 1958, 48:10
Carsdorf (Pegau)	Germany	2	EBA II	273	RLB Saxon	Leipzig	V2385	Own measurements	Billig 1958, 48:12
Carsdorf (Pegau)	Germany	2	EBA II	254	RLB Saxon	Leipzig	V2382	Own measurements	Billig 47,14?
Carsdorf (Pegau)	Germany	2	EBA II	219	RLB Saxon	Leipzig	V2388	Own measurements	Billig 1958, 48:5
Carsdorf (Pegau)	Germany	2	EBA II	152	RLB Saxon	Leipzig	V2383	Own measurements	Billig 1958, 47:7
Carsdorf (Pegau)	Germany	2	EBA II	231	RLB Saxon	Leipzig	V2397	Own measurements	Billig 1958, 48:13
Carsdorf (Pegau)	Germany	2	EBA II	265	RLB Saxon	Leipzig	V2402	Own measurements	Billig 1958, 47:13
Carsdorf (Pegau)	Germany	2	EBA II	241	RLB Saxon	Leipzig	V2400	Own measurements	Billig 1958, 47:1
Carsdorf (Pegau)	Germany	2	EBA II	237	RLB Saxon	Leipzig	V2378	Own measurements	Billig 1958, 47:2
Carsdorf (Pegau)	Germany	2	EBA II	228	RLB Saxon	Leipzig	V2384	Own measurements	Billig 1958, 47:3
Carsdorf (Pegau)	Germany	2	EBA II	165	RLB Saxon	Leipzig	V2379	Own measurements	Billig 1958, 47:4
Carsdorf (Pegau)	Germany	2	EBA II	137	RLB Saxon	Leipzig	V2380	Own measurements	Billig 1958, 47:5
Carsdorf (Pegau)	Germany	2	EBA II	189	RLB Saxon	Leipzig	V2381	Own measurements	Billig 1958, 47:6
Carsdorf (Pegau)	Germany	2	EBA II	212	RLB Saxon	Leipzig	V2399	Own measurements	Billig 1958, 47:11
Carsdorf (Pegau)	Germany	2	EBA II	205	RLB Saxon	Leipzig	V2395	Own measurements	Billig 1958, 47:12
Carsdorf (Pegau)	Germany	2	EBA II	191	RLB Saxon	Leipzig	V2390	Own measurements	Billig 1958, 48:3
Carsdorf (Pegau)	Germany	2	EBA II	251	RLB Saxon	Leipzig	V2394	Own measurements	Billig 1958, 47:15
Carsdorf (Pegau)	Germany	2	EBA II	229	RLB Saxon	Leipzig	V2401	Own measurements	Billig 1958, 47:16
Carsdorf (Pegau)	Germany	2	EBA II	244	RLB Saxon	Leipzig	V2396	Own measurements	Billig 1958, 47:17
Carsdorf (Pegau)	Germany	2	EBA II	268	RLB Saxon	Leipzig	V2389	Own measurements	Billig 1958, 47:20
Carsdorf (Pegau)	Germany	2	EBA II	197	RLB Saxon	Leipzig	V2392	Own measurements	Billig 1958, 48:1
Carsdorf (Pegau)	Germany	2	EBA II	175	RLB Saxon	Leipzig	V2387	Own measurements	Billig 1958, 48:2
Carsdorf (Pegau)	Germany	2	EBA II	233	RLB Saxon	Leipzig	V2377	Own measurements	Billig 1958, 47:8
Czarkow	Poland	2	LBA	228	TLB	Bytom	NA	Kusnierz 1998	PBFIX21-171
Czarkow	Poland	2	LBA	235	TLB	Bytom	NA	Kusnierz 1998	PBFIX21-176
Czarkow	Poland	2	LBA	220	TLB	Bytom	NA	Kusnierz 1998	PBFIX21-174
Czarkow	Poland	2	LBA	214	TLB	Bytom	NA	Kusnierz 1998	PBFIX21-175
Czarkow	Poland	2	LBA	222	TLB	Bytom	NA	Kusnierz 1998	PBFIX21-172
Czarkow	Poland	2	LBA	166	TLB	Bytom	NA	Kusnierz 1998	PBFIX21-43
Czarkow	Poland	2	LBA	195	TLB	Bytom	NA	Kusnierz 1998	PBFIX21-170
Czarkow	Poland	2	LBA	230	TLB	Bytom	NA	Kusnierz 1998	PBFIX21-169
Czarkow	Poland	2	LBA	247	TLB	Bytom	NA	Kusnierz 1998	PBFIX21-168
Czarkow	Poland	2	LBA	152	TLB	Bytom	NA	Kusnierz 1998	PBFIX21-44
Czarkow	Poland	2	LBA	218	TLB	Bytom	NA	Kusnierz 1998	PBFIX21-166
Czarkow	Poland	2	LBA	215	TLB	Bytom	NA	Kusnierz 1998	PBFIX21-165
Czarkow	Poland	2	LBA	216	TLB	Bytom	NA	Kusnierz 1998	PBFIX21-164
Czarkow	Poland	2	LBA	218	TLB	Bytom	NA	Kusnierz 1998	PBFIX21-163
Czarkow	Poland	2	LBA	205	TLB	Bytom	NA	Kusnierz 1998	PBFIX21-162
Czarkow	Poland	2	LBA	208	TLB	Bytom	NA	Kusnierz 1998	PBFIX21-161
Czarkow	Poland	2	LBA	215	TLB	Bytom	NA	Kusnierz 1998	PBFIX21-160
Czarkow	Poland	2	LBA	210	TLB	Bytom	NA	Kusnierz 1998	PBFIX21-167
Czarkow	Poland	2	LBA	215	TLB	Bytom	NA	Kusnierz 1998	PBFIX21-173
Dederstedt	Germany	2	EBA I	165	RLB Sächsisches	Eisleben	567h	Brunn 1959	BRN59-Taf. 8
Dederstedt	Germany	2	EBA I	133	RLB Sächsisches	Eisleben	567k	Brunn 1959	BRN59-Taf. 8
Dederstedt	Germany	2	EBA I	116	RLB Sächsisches	Eisleben	567n	Brunn 1959	BRN59-Taf. 8
Dederstedt	Germany	2	EBA I	130	RLB Sächsisches	Eisleben	567i	Brunn 1959	BRN59-Taf. 8
Dederstedt	Germany	2	EBA I	187	RLB Sächsisches	Eisleben	567j	Brunn 1959	BRN59-Taf. 8
Dederstedt	Germany	2	EBA I	200	RLB Sächsisches	Eisleben	567c	Brunn 1959	BRN59-Taf. 8
Dederstedt	Germany	2	EBA I	206	RLB Sächsisches	Eisleben	567b	Brunn 1959	BRN59-8-8a
Dederstedt	Germany	2	EBA I	164	RLB Sächsisches	Eisleben	567a	Brunn 1959	BRN59-Taf. 8
Dederstedt	Germany	2	EBA I	191	RLB Sächsisches	Eisleben	567d	Brunn 1959	BRN59-Taf. 8
Dermsdorf	Germany	2	EBA I	188.8	RLB Sächsisches	Dermsdorf	11/101-58	Landesamt für Denkmalpflege und Archäologie Thueringen	58
Dermsdorf	Germany	2	EBA I	257.4	RLB Sächsisches	Dermsdorf	11/101-97	Landesamt für Denkmalpflege und Archäologie Thueringen	97
Dermsdorf	Germany	2	EBA I	417.5	RLB Sächsisches	Dermsdorf	11/101-108	Landesamt für Denkmalpflege und Archäologie Thueringen	108
Dermsdorf	Germany	2	EBA I	257.6	RLB	Dermsdorf	11/101-107	Landesamt für Denkmalpflege und Archäologie Thueringen	107
Dermsdorf	Germany	2	EBA I	217.4	RLB Sächsisches	Dermsdorf	11/101-106	Landesamt für Denkmalpflege und Archäologie Thueringen	106
Dermsdorf	Germany	2	EBA I	159.5	RLB Salez	Dermsdorf	11/101-105	Landesamt für Denkmalpflege und Archäologie Thueringen	105
Dermsdorf	Germany	2	EBA I	221	RLB Sächsisches	Dermsdorf	11/101-104	Landesamt für Denkmalpflege und Archäologie Thueringen	104
Dermsdorf	Germany	2	EBA I	205.5	RLB Sächsisches	Dermsdorf	11/101-103	Landesamt für Denkmalpflege und Archäologie Thueringen	103
Dermsdorf	Germany	2	EBA I	166.1	RLB Sächsisches	Dermsdorf	11/101-102	Landesamt für Denkmalpflege und Archäologie Thueringen	102
Dermsdorf	Germany	2	EBA I	242.5	RLB	Dermsdorf	11/101-101	Landesamt für Denkmalpflege und Archäologie Thueringen	101
Dermsdorf	Germany	2	EBA I	207.7	RLB Sächsisches	Dermsdorf	11/101-100	Landesamt für Denkmalpflege und Archäologie Thueringen	100
Dermsdorf	Germany	2	EBA I	285.7	RLB Sächsisches	Dermsdorf	11/101-86	Landesamt für Denkmalpflege und Archäologie Thueringen	86
Dermsdorf	Germany	2	EBA I	210.3	RLB Salez	Dermsdorf	11/101-98	Landesamt für Denkmalpflege und Archäologie Thueringen	98
Dermsdorf	Germany	2	EBA I	192.9	RLB	Dermsdorf	11/101-112	Landesamt für Denkmalpflege und Archäologie Thueringen	112
Dermsdorf	Germany	2	EBA I	174.8	RLB Sächsisches	Dermsdorf	11/101-96	Landesamt für Denkmalpflege und Archäologie Thueringen	96
Dermsdorf	Germany	2	EBA I	271.2	RLB Sächsisches	Dermsdorf	11/101-95	Landesamt für Denkmalpflege und Archäologie Thueringen	95
Dermsdorf	Germany	2	EBA I	319.8	RLB Sächsisches	Dermsdorf	11/101-94	Landesamt für Denkmalpflege und Archäologie Thueringen	94
Dermsdorf	Germany	2	EBA I	216	RLB Sächsisches	Dermsdorf	11/101-56	Landesamt für Denkmalpflege und Archäologie Thueringen	56
Dermsdorf	Germany	2	EBA I	211.8	RLB Sächsisches	Dermsdorf	11/101-92	Landesamt für Denkmalpflege und Archäologie Thueringen	92
Dermsdorf	Germany	2	EBA I	486.4	RLB	Dermsdorf	11/101-1	Landesamt für Denkmalpflege und Archäologie Thueringen	1
Dermsdorf	Germany	2	EBA I	201.8	RLB Sächsisches	Dermsdorf	11/101-90	Landesamt für Denkmalpflege und Archäologie Thueringen	90
Dermsdorf	Germany	2	EBA I	158.8	RLB Sächsisches	Dermsdorf	11/101-89	Landesamt für Denkmalpflege und Archäologie Thueringen	89
Dermsdorf	Germany	2	EBA I	173.2	RLB Salez	Dermsdorf	11/101-88	Landesamt für Denkmalpflege und Archäologie Thueringen	88
Dermsdorf	Germany	2	EBA I	289.5	RLB Sächsisches	Dermsdorf	11/101-87	Landesamt für Denkmalpflege und Archäologie Thueringen	87
Dermsdorf	Germany	2	EBA I	167	RLB Salez	Dermsdorf	11/101-99	Landesamt für Denkmalpflege und Archäologie Thueringen	99
Dermsdorf	Germany	2	EBA I	176.1	RLB Salez	Dermsdorf	11/101-122	Landesamt für Denkmalpflege und Archäologie Thueringen	122
Dermsdorf	Germany	2	EBA I	202.1	RLB Sächsisches	Dermsdorf	11/101-134	Landesamt für Denkmalpflege und Archäologie Thueringen	134
Dermsdorf	Germany	2	EBA I	233	RLB Sächsisches	Dermsdorf	11/101-133	Landesamt für Denkmalpflege und Archäologie Thueringen	133
Dermsdorf	Germany	2	EBA I	279.1	RLB Sächsisches	Dermsdorf	11/101-132	Landesamt für Denkmalpflege und Archäologie Thueringen	132
Dermsdorf	Germany	2	EBA I	460.3	RLB Sächsisches	Dermsdorf	11/101-131	Landesamt für Denkmalpflege und Archäologie Thueringen	131
Dermsdorf	Germany	2	EBA I	239.6	RLB Sächsisches	Dermsdorf	11/101-130	Landesamt für Denkmalpflege und Archäologie Thueringen	130
Dermsdorf	Germany	2	EBA I	146	RLB Salez	Dermsdorf	11/101-129	Landesamt für Denkmalpflege und Archäologie Thueringen	129
Dermsdorf	Germany	2	EBA I	180.1	RLB Salez	Dermsdorf	11/101-128	Landesamt für Denkmalpflege und Archäologie Thueringen	128
Dermsdorf	Germany	2	EBA I	265.8	RLB Sächsisches	Dermsdorf	11/101-127	Landesamt für Denkmalpflege und Archäologie Thueringen	127
Dermsdorf	Germany	2	EBA I	202.7	RLB Sächsisches	Dermsdorf	11/101-126	Landesamt für Denkmalpflege und Archäologie Thueringen	126
Dermsdorf	Germany	2	EBA I	226.8	RLB Sächsisches	Dermsdorf	11/101-125	Landesamt für Denkmalpflege und Archäologie Thueringen	125
Dermsdorf	Germany	2	EBA I	365.9	RLB Sächsisches	Dermsdorf	11/101-109	Landesamt für Denkmalpflege und Archäologie Thueringen	109
Dermsdorf	Germany	2	EBA I	167.9	RLB Salez	Dermsdorf	11/101-123	Landesamt für Denkmalpflege und Archäologie Thueringen	123
Dermsdorf	Germany	2	EBA I	210.2	RLB Sächsisches	Dermsdorf	11/101-110	Landesamt für Denkmalpflege und Archäologie Thueringen	110
Dermsdorf	Germany	2	EBA I	194	RLB Sächsisches	Dermsdorf	11/101-121	Landesamt für Denkmalpflege und Archäologie Thueringen	121
Dermsdorf	Germany	2	EBA I	222.5	RLB Salez	Dermsdorf	11/101-120	Landesamt für Denkmalpflege und Archäologie Thueringen	120
Dermsdorf	Germany	2	EBA I	244.8	RLB Sächsisches	Dermsdorf	11/101-119	Landesamt für Denkmalpflege und Archäologie Thueringen	119
Dermsdorf	Germany	2	EBA I	196.7	RLB Salez	Dermsdorf	11/101-118	Landesamt für Denkmalpflege und Archäologie Thueringen	118
Dermsdorf	Germany	2	EBA I	179.9	RLB Salez	Dermsdorf	11/101-117	Landesamt für Denkmalpflege und Archäologie Thueringen	117
Dermsdorf	Germany	2	EBA I	259.2	RLB	Dermsdorf	11/101-116	Landesamt für Denkmalpflege und Archäologie Thueringen	116
Dermsdorf	Germany	2	EBA I	204.9	RLB Sächsisches	Dermsdorf	11/101-115	Landesamt für Denkmalpflege und Archäologie Thueringen	115
Dermsdorf	Germany	2	EBA I	208.4	RLB Sächsisches	Dermsdorf	11/101-114	Landesamt für Denkmalpflege und Archäologie Thueringen	114
Dermsdorf	Germany	2	EBA I	210.3	RLB Salez	Dermsdorf	11/101-113	Landesamt für Denkmalpflege und Archäologie Thueringen	113
Dermsdorf	Germany	2	EBA I	295.4	RLB	Dermsdorf	11/101-91	Landesamt für Denkmalpflege und Archäologie Thueringen	91
Dermsdorf	Germany	2	EBA I	164.3	RLB Sächsisches	Dermsdorf	11/101-124	Landesamt für Denkmalpflege und Archäologie Thueringen	124
Dermsdorf	Germany	2	EBA I	466.2	RLB Neyruz	Dermsdorf	11/101-12	Landesamt für Denkmalpflege und Archäologie Thueringen	12
Dermsdorf	Germany	2	EBA I	160.2	RLB Sächsisches	Dermsdorf	11/101-60	Landesamt für Denkmalpflege und Archäologie Thueringen	60
Dermsdorf	Germany	2	EBA I	256.6	RLB Sächsisches	Dermsdorf	11/101-59	Landesamt für Denkmalpflege und Archäologie Thueringen	59
Dermsdorf	Germany	2	EBA I	188.3	RLB Sächsisches	Dermsdorf	11/101-57	Landesamt für Denkmalpflege und Archäologie Thueringen	57
Dermsdorf	Germany	2	EBA I	235.1	RLB Sächsisches	Dermsdorf	11/101-85	Landesamt für Denkmalpflege und Archäologie Thueringen	85
Dermsdorf	Germany	2	EBA I	271.2	RLB	Dermsdorf	11/101-54	Landesamt für Denkmalpflege und Archäologie Thueringen	54
Dermsdorf	Germany	2	EBA I	228.8	RLB Sächsisches	Dermsdorf	11/101-93	Landesamt für Denkmalpflege und Archäologie Thueringen	93
Dermsdorf	Germany	2	EBA I	444.1	RLB Neyruz	Dermsdorf	11/101-17	Landesamt für Denkmalpflege und Archäologie Thueringen	17
Dermsdorf	Germany	2	EBA I	430.1	RLB Neyruz	Dermsdorf	11/101-16	Landesamt für Denkmalpflege und Archäologie Thueringen	16
Dermsdorf	Germany	2	EBA I	361.4	RLB Neyruz	Dermsdorf	11/101-15	Landesamt für Denkmalpflege und Archäologie Thueringen	15
Dermsdorf	Germany	2	EBA I	166	RLB Sächsisches	Dermsdorf	11/101-61	Landesamt für Denkmalpflege und Archäologie Thueringen	61
Dermsdorf	Germany	2	EBA I	254.6	RLB	Dermsdorf	11/101-13	Landesamt für Denkmalpflege und Archäologie Thueringen	13
Dermsdorf	Germany	2	EBA I	143.1	RLB Sächsisches	Dermsdorf	11/101-55	Landesamt für Denkmalpflege und Archäologie Thueringen	55
Dermsdorf	Germany	2	EBA I	288.2	RLB Sächsisches	Dermsdorf	11/101-11	Landesamt für Denkmalpflege und Archäologie Thueringen	11
Dermsdorf	Germany	2	EBA I	220.8	RLB Sächsisches	Dermsdorf	11/101-10	Landesamt für Denkmalpflege und Archäologie Thueringen	10
Dermsdorf	Germany	2	EBA I	186.8	RLB Sächsisches	Dermsdorf	11/101-9	Landesamt für Denkmalpflege und Archäologie Thueringen	9
Dermsdorf	Germany	2	EBA I	207.9	RLB Sächsisches	Dermsdorf	11/101-8	Landesamt für Denkmalpflege und Archäologie Thueringen	8
Dermsdorf	Germany	2	EBA I	251.8	RLB Sächsisches	Dermsdorf	11/101-7	Landesamt für Denkmalpflege und Archäologie Thueringen	7
Dermsdorf	Germany	2	EBA I	240.2	RLB Sächsisches	Dermsdorf	11/101-6	Landesamt für Denkmalpflege und Archäologie Thueringen	6
Dermsdorf	Germany	2	EBA I	271.1	RLB Sächsisches	Dermsdorf	11/101-5	Landesamt für Denkmalpflege und Archäologie Thueringen	5
Dermsdorf	Germany	2	EBA I	296.9	RLB Neyruz	Dermsdorf	11/101-4	Landesamt für Denkmalpflege und Archäologie Thueringen	4
Dermsdorf	Germany	2	EBA I	454.4	RLB Neyruz	Dermsdorf	11/101-3	Landesamt für Denkmalpflege und Archäologie Thueringen	3
Dermsdorf	Germany	2	EBA I	484.5	RLB Neyruz	Dermsdorf	11/101-2	Landesamt für Denkmalpflege und Archäologie Thueringen	2
Dermsdorf	Germany	2	EBA I	267.3	RLB	Dermsdorf	11/101-14	Landesamt für Denkmalpflege und Archäologie Thueringen	14
Dermsdorf	Germany	2	EBA I	178.3	RLB Sächsisches	Dermsdorf	11/101-78	Landesamt für Denkmalpflege und Archäologie Thueringen	78
Dermsdorf	Germany	2	EBA I	208.4	RLB Sächsisches	Dermsdorf	11/101-84	Landesamt für Denkmalpflege und Archäologie Thueringen	84
Dermsdorf	Germany	2	EBA I	160.4	RLB Sächsisches	Dermsdorf	11/101-83	Landesamt für Denkmalpflege und Archäologie Thueringen	83
Dermsdorf	Germany	2	EBA I	268.5	RLB	Dermsdorf	11/101-82	Landesamt für Denkmalpflege und Archäologie Thueringen	82
Dermsdorf	Germany	2	EBA I	147	RLB Sächsisches	Dermsdorf	11/101-81	Landesamt für Denkmalpflege und Archäologie Thueringen	81
Dermsdorf	Germany	2	EBA I	178.4	RLB Sächsisches	Dermsdorf	11/101-53	Landesamt für Denkmalpflege und Archäologie Thueringen	53
Dermsdorf	Germany	2	EBA I	244.3	RLB Salez	Dermsdorf	11/101-79	Landesamt für Denkmalpflege und Archäologie Thueringen	79
Dermsdorf	Germany	2	EBA I	214.3	RLB Sächsisches	Dermsdorf	11/101-62	Landesamt für Denkmalpflege und Archäologie Thueringen	62
Dermsdorf	Germany	2	EBA I	206.4	RLB Sächsisches	Dermsdorf	11/101-77	Landesamt für Denkmalpflege und Archäologie Thueringen	77
Dermsdorf	Germany	2	EBA I	190.8	RLB Sächsisches	Dermsdorf	11/101-76	Landesamt für Denkmalpflege und Archäologie Thueringen	76
Dermsdorf	Germany	2	EBA I	247.7	RLB	Dermsdorf	11/101-75	Landesamt für Denkmalpflege und Archäologie Thueringen	75
Dermsdorf	Germany	2	EBA I	169.9	RLB Sächsisches	Dermsdorf	11/101-74	Landesamt für Denkmalpflege und Archäologie Thueringen	74
Dermsdorf	Germany	2	EBA I	251.8	RLB	Dermsdorf	11/101-64	Landesamt für Denkmalpflege und Archäologie Thueringen	64
Dermsdorf	Germany	2	EBA I	228.5	RLB Sächsisches	Dermsdorf	11/101-80	Landesamt für Denkmalpflege und Archäologie Thueringen	80
Dermsdorf	Germany	2	EBA I	267.9	RLB Sächsisches	Dermsdorf	11/101-73	Landesamt für Denkmalpflege und Archäologie Thueringen	73
Dermsdorf	Germany	2	EBA I	148.1	RLB Salez	Dermsdorf	11/101-63	Landesamt für Denkmalpflege und Archäologie Thueringen	63
Dermsdorf	Germany	2	EBA I	166.2	RLB Sächsisches	Dermsdorf	11/101-65	Landesamt für Denkmalpflege und Archäologie Thueringen	65
Dermsdorf	Germany	2	EBA I	261.7	RLB Sächsisches	Dermsdorf	11/101-66	Landesamt für Denkmalpflege und Archäologie Thueringen	66
Dermsdorf	Germany	2	EBA I	216.1	RLB Salez	Dermsdorf	11/101-67	Landesamt für Denkmalpflege und Archäologie Thueringen	67
Dermsdorf	Germany	2	EBA I	168.7	RLB Salez	Dermsdorf	11/101-68	Landesamt für Denkmalpflege und Archäologie Thueringen	68
Dermsdorf	Germany	2	EBA I	134.1	RLB Salez	Dermsdorf	11/101-69	Landesamt für Denkmalpflege und Archäologie Thueringen	69
Dermsdorf	Germany	2	EBA I	219.6	RLB	Dermsdorf	11/101-70	Landesamt für Denkmalpflege und Archäologie Thueringen	70
Dermsdorf	Germany	2	EBA I	139.5	RLB Sächsisches	Dermsdorf	11/101-71	Landesamt für Denkmalpflege und Archäologie Thueringen	71
Dermsdorf	Germany	2	EBA I	181.3	RLB Sächsisches	Dermsdorf	11/101-72	Landesamt für Denkmalpflege und Archäologie Thueringen	72
Dobročkovice	Czech Republic	1	EBA I	204	RLB Saxon	Brno	53627	Own measurements	PBFIX17-190
Dobročkovice	Czech Republic	1	EBA I	425	RLB Saxon	Brno	53620	Own measurements	PBFIX17-272
Dobročkovice	Czech Republic	1	EBA I	402	RLB Saxon	Brno	536219	Own measurements	PBFIX17-233
Dobročkovice	Czech Republic	1	EBA I	224	RLB Saxon	Brno	53624	Own measurements	PBFIX17-203
Dobročkovice	Czech Republic	1	EBA I	223	RLB Saxon	Brno	53625	Own measurements	PBFIX17-178
Dobročkovice	Czech Republic	1	EBA I	182	RLB Saxon	Brno	53622	Own measurements	PBFIX17-181
Dobročkovice	Czech Republic	1	EBA I	210	RLB Saxon	Brno	53621	Own measurements	PBFIX17-189
Dobročkovice	Czech Republic	1	EBA I	282	RLB Saxon	Brno	NA	Own measurements	-
Dresden-Laubegast	Germany	2	LBA	537	LPB	Dresden	NA	Coblenz 1951	AFSB2-55/47
Dresden-Laubegast	Germany	2	LBA	269	LPB	Dresden	NA	Coblenz 1951	AFSB2-56/47
Dresden-Laubegast	Germany	2	LBA	373	LPB	Dresden	NA	Coblenz 1951	AFSB2-58/47
Dresden-Laubegast	Germany	2	LBA	420	LPB	Dresden	NA	Coblenz 1951	AFSB2-57/47
Forchheim-Serlbach	Germany	1	MBA	240	RLB Salez	Forchheim	NA	Pászthory and Mayer 1998	PBFIX20-167
Forchheim-Serlbach	Germany	1	MBA	365	RLB Salez	Forchheim	NA	Pászthory and Mayer 1998	PBFIX20-173
Forchheim-Serlbach	Germany	1	MBA	170	RLB Saxon	Forchheim	NA	Pászthory and Mayer 1998	PBFIX20-79
Forchheim-Serlbach	Germany	1	MBA	395	ASB	Forchheim	NA	Pászthory and Mayer 1998	PBFIX20-370
Forchheim-Serlbach	Germany	1	MBA	185	RLB Salez	Forchheim	NA	Pászthory and Mayer 1998	PBFIX20-169
Forchheim-Serlbach	Germany	1	MBA	450	ASB	Forchheim	NA	Pászthory and Mayer 1998	PBFIX20-368
Forchheim-Serlbach	Germany	1	MBA	385	ASB	Forchheim	NA	Pászthory and Mayer 1998	PBFIX20-367
Forchheim-Serlbach	Germany	1	MBA	420	ASB	Forchheim	NA	Pászthory and Mayer 1998	PBFIX20-372
Forchheim-Serlbach	Germany	1	MBA	185	RLB Salez	Forchheim	NA	Pászthory and Mayer 1998	PBFIX20-174
Forchheim-Serlbach	Germany	1	MBA	470	ASB	Forchheim	NA	Pászthory and Mayer 1998	PBFIX20-371
Forchheim-Serlbach	Germany	1	MBA	305	RLB Salez	Forchheim	NA	Pászthory and Mayer 1998	PBFIX20-172
Forchheim-Serlbach	Germany	1	MBA	175	RLB Salez	Forchheim	NA	Pászthory and Mayer 1998	PBFIX20-171
Forchheim-Serlbach	Germany	1	MBA	180	RLB Salez	Forchheim	NA	Pászthory and Mayer 1998	PBFIX20-170
Forchheim-Serlbach	Germany	1	MBA	180	RLB Salez	Forchheim	NA	Pászthory and Mayer 1998	PBFIX20-168
Forchheim-Serlbach	Germany	1	MBA	355	RLB Salez	Forchheim	NA	Pászthory and Mayer 1998	PBFIX20-166
Forchheim-Serlbach	Germany	1	MBA	490	RLB Langquaid	Forchheim	NA	Pászthory and Mayer 1998	PBFIX20-103
Forchheim-Serlbach	Germany	1	MBA	285	ASB	Forchheim	NA	Pászthory and Mayer 1998	PBFIX20-366
Forchheim-Serlbach	Germany	1	MBA	380	ASB	Forchheim	NA	Pászthory and Mayer 1998	PBFIX20-373
Forchheim-Serlbach	Germany	1	MBA	210	RLB	Forchheim	NA	Pászthory and Mayer 1998	PBFIX20-97
Forchheim-Serlbach	Germany	1	MBA	370	ASB	Forchheim	NA	Pászthory and Mayer 1998	PBFIX20-369
Forchheim-Serlbach	Germany	1	MBA	205	RLB	Forchheim	NA	Pászthory and Mayer 1998	PBFIX20-254
Forchheim-Serlbach	Germany	1	MBA	505	RLB Langquaid	Forchheim	NA	Pászthory and Mayer 1998	PBFIX20-102
Gams-Gasenzen	Switzerland	1	EBA I	198	RLB Salez	St. Gallen	NA	Abels 1972; Bill 1985	00577/7
Gams-Gasenzen	Switzerland	1	EBA I	228.7	RLB Salez	St. Gallen	NA	Abels 1972; Bill 1985	00577/6
Gams-Gasenzen	Switzerland	1	EBA I	193.1	RLB Salez	St. Gallen	NA	Abels 1972; Bill 1985	00577/5
Grenchen	Switzerland	1	MBA	700	RLB	Bern	9832	Abels 1972	PBFIX4-564
Grenchen	Switzerland	1	MBA	595	RLB	Bern	9831	Abels 1972	PBFIX4-563
Grenchen	Switzerland	1	MBA	765	RLB	Bern	9834	Abels 1972	PBFIX4-566
Grenchen	Switzerland	1	MBA	652	RLB	Bern	9835	Abels 1972	PBFIX4-567
Gröbers-Bennewitz	Germany	2	EBA II	311.68	RLB Saxon	Berlin	II 11485	Museum Berlin	II 11485
Gröbers-Bennewitz	Germany	2	EBA II	279.93	RLB Saxon	Berlin	II 11489	Museum Berlin	II 11489
Gröbers-Bennewitz	Germany	2	EBA II	247.9	RLB Saxon	Berlin	II 11492	Museum Berlin	II 11492
Gröbers-Bennewitz	Germany	2	EBA II	281.31	RLB Saxon	Berlin	II 11491	Museum Berlin	II 11491
Gröbers-Bennewitz	Germany	2	EBA II	270.67	RLB Saxon	Berlin	II 11509	Museum Berlin	II 11509
Gröbers-Bennewitz	Germany	2	EBA II	249.85	RLB Saxon	Berlin	II 11490	Museum Berlin	II 11490
Gröbers-Bennewitz	Germany	2	EBA II	316.2	RLB Saxon	Berlin	II 11385	Museum Berlin	II 11385
Gröbers-Bennewitz	Germany	2	EBA II	353.49	RLB Saxon	Berlin	II 11493	Museum Berlin	II 11493
Gröbers-Bennewitz	Germany	2	EBA II	297.9	RLB Saxon	Berlin	II 11488	Museum Berlin	II 11488
Gröbers-Bennewitz	Germany	2	EBA II	310.74	RLB Saxon	Berlin	II 11486	Museum Berlin	II 11486
Gröbers-Bennewitz	Germany	2	EBA II	275.33	RLB Saxon	Berlin	II 11484	Museum Berlin	II 11484
Gröbers-Bennewitz	Germany	2	EBA II	290.83	RLB Saxon	Berlin	II 11483	Museum Berlin	II 11483
Gröbers-Bennewitz	Germany	2	EBA II	308.49	RLB Saxon	Berlin	II 11482	Museum Berlin	II 11482
Gröbers-Bennewitz	Germany	2	EBA II	258.56	RLB Saxon	Berlin	II 11481	Museum Berlin	II 11481
Gröbers-Bennewitz	Germany	2	EBA II	264.48	RLB Saxon	Berlin	II 11480	Museum Berlin	II 11480
Gröbers-Bennewitz	Germany	2	EBA II	287.58	RLB Saxon	Berlin	II 11479	Museum Berlin	II 11479
Gröbers-Bennewitz	Germany	2	EBA II	284.83	RLB Saxon	Berlin	II 11478	Museum Berlin	II 11478
Gröbers-Bennewitz	Germany	2	EBA II	258.68	RLB Saxon	Berlin	II 11487	Museum Berlin	II 11487
Gröbers-Bennewitz	Germany	2	EBA II	290.76	RLB Saxon	Berlin	II 11511	Museum Berlin	II 11511
Gröbers-Bennewitz	Germany	2	EBA II	260.78	RLB Saxon	Berlin	II 11505	Museum Berlin	II 11505
Gröbers-Bennewitz	Germany	2	EBA II	285.25	RLB Saxon	Berlin	II 11504	Museum Berlin	II 11504
Gröbers-Bennewitz	Germany	2	EBA II	334.56	RLB Saxon	Berlin	II 11503	Museum Berlin	II 11503
Gröbers-Bennewitz	Germany	2	EBA II	290.25	RLB Saxon	Berlin	II 11502	Museum Berlin	II 11502
Gröbers-Bennewitz	Germany	2	EBA II	251.71	RLB Saxon	Berlin	II 11501	Museum Berlin	II 11501
Gröbers-Bennewitz	Germany	2	EBA II	249.18	RLB Saxon	Berlin	II 11500	Museum Berlin	II 11500
Gröbers-Bennewitz	Germany	2	EBA II	273.8	RLB Saxon	Berlin	II 11499	Museum Berlin	II 11499
Gröbers-Bennewitz	Germany	2	EBA II	298.58	RLB Saxon	Berlin	II 11498	Museum Berlin	II 11498
Gröbers-Bennewitz	Germany	2	EBA II	283.38	RLB Saxon	Berlin	II 11497	Museum Berlin	II 11497
Gröbers-Bennewitz	Germany	2	EBA II	304.05	RLB Saxon	Berlin	II 11496	Museum Berlin	II 11496
Gröbers-Bennewitz	Germany	2	EBA II	291	RLB Saxon	Berlin	II 11477	Museum Berlin	II 11477
Gröbers-Bennewitz	Germany	2	EBA II	297.73	RLB Saxon	Berlin	II 11494	Museum Berlin	II 11494
Gröbers-Bennewitz	Germany	2	EBA II	250.32	RLB Saxon	Berlin	II 11508	Museum Berlin	II 11508
Gröbers-Bennewitz	Germany	2	EBA II	325.09	RLB Saxon	Berlin	II 11512	Museum Berlin	II 11512
Gröbers-Bennewitz	Germany	2	EBA II	245.35	RLB Saxon	Berlin	II 11513	Museum Berlin	II 11513
Gröbers-Bennewitz	Germany	2	EBA II	323.48	RLB Saxon	Berlin	II 11514	Museum Berlin	II 11514
Gröbers-Bennewitz	Germany	2	EBA II	294.66	RLB Saxon	Berlin	II 11515	Museum Berlin	II 11515
Gröbers-Bennewitz	Germany	2	EBA II	276.11	RLB Saxon	Berlin	II 11516	Museum Berlin	II 11516
Gröbers-Bennewitz	Germany	2	EBA II	273.82	RLB Saxon	Berlin	II 11517	Museum Berlin	II 11517
Gröbers-Bennewitz	Germany	2	EBA II	295.79	RLB Saxon	Berlin	II 11518	Museum Berlin	II 11518
Gröbers-Bennewitz	Germany	2	EBA II	324.68	RLB Saxon	Berlin	II 11510	Museum Berlin	II 11510
Gröbers-Bennewitz	Germany	2	EBA II	293.44	RLB Saxon	Berlin	II 11507	Museum Berlin	II 11507
Gröbers-Bennewitz	Germany	2	EBA II	259.12	RLB Saxon	Berlin	II 11506	Museum Berlin	II 11506
Gröbers-Bennewitz	Germany	2	EBA II	309.17	RLB Saxon	Berlin	II 11495	Museum Berlin	II 11495
Gröbers-Bennewitz	Germany	2	EBA II	299.3	RLB Saxon	Berlin	II 11398	Museum Berlin	II 11398
Gröbers-Bennewitz	Germany	2	EBA II	287.03	RLB Saxon	Berlin	II 11387	Museum Berlin	II 11387
Gröbers-Bennewitz	Germany	2	EBA II	281.39	RLB Saxon	Berlin	II 11383	Museum Berlin	II 11383
Gröbers-Bennewitz	Germany	2	EBA II	280.8	RLB Saxon	Berlin	II 11384	Museum Berlin	II 11384
Gröbers-Bennewitz	Germany	2	EBA II	303.15	RLB Saxon	Berlin	II 11459	Museum Berlin	II 11459
Gröbers-Bennewitz	Germany	2	EBA II	308.67	RLB Saxon	Berlin	II 11386	Museum Berlin	II 11386
Gröbers-Bennewitz	Germany	2	EBA II	316.3	RLB Saxon	Berlin	II 11388	Museum Berlin	II 11388
Gröbers-Bennewitz	Germany	2	EBA II	283.13	RLB Saxon	Berlin	II 11389	Museum Berlin	II 11389
Gröbers-Bennewitz	Germany	2	EBA II	293.38	RLB Saxon	Berlin	II 11390	Museum Berlin	II 11390
Gröbers-Bennewitz	Germany	2	EBA II	298.82	RLB Saxon	Berlin	II 11391	Museum Berlin	II 11391
Gröbers-Bennewitz	Germany	2	EBA II	337.62	RLB Saxon	Berlin	II 11392	Museum Berlin	II 11392
Gröbers-Bennewitz	Germany	2	EBA II	284.05	RLB Saxon	Berlin	II 11393	Museum Berlin	II 11393
Gröbers-Bennewitz	Germany	2	EBA II	314.13	RLB Saxon	Berlin	II 11394	Museum Berlin	II 11394
Gröbers-Bennewitz	Germany	2	EBA II	298.25	RLB Saxon	Berlin	II 11395	Museum Berlin	II 11395
Gröbers-Bennewitz	Germany	2	EBA II	269.28	RLB Saxon	Berlin	II 11381	Museum Berlin	II 11381
Gröbers-Bennewitz	Germany	2	EBA II	299.94	RLB Saxon	Berlin	II 11404	Museum Berlin	II 11404
Gröbers-Bennewitz	Germany	2	EBA II	278.53	RLB Saxon	Berlin	II 11411	Museum Berlin	II 11411
Gröbers-Bennewitz	Germany	2	EBA II	306.95	RLB Saxon	Berlin	II 11410	Museum Berlin	II 11410
Gröbers-Bennewitz	Germany	2	EBA II	311.09	RLB Saxon	Berlin	II 11409	Museum Berlin	II 11409
Gröbers-Bennewitz	Germany	2	EBA II	295.12	RLB Saxon	Berlin	II 11408	Museum Berlin	II 11408
Gröbers-Bennewitz	Germany	2	EBA II	306.42	RLB Saxon	Berlin	II 11407	Museum Berlin	II 11407
Gröbers-Bennewitz	Germany	2	EBA II	325.6	RLB Saxon	Berlin	II 11396	Museum Berlin	II 11396
Gröbers-Bennewitz	Germany	2	EBA II	324.45	RLB Saxon	Berlin	II 11405	Museum Berlin	II 11405
Gröbers-Bennewitz	Germany	2	EBA II	291.13	RLB Saxon	Berlin	II 11397	Museum Berlin	II 11397
Gröbers-Bennewitz	Germany	2	EBA II	267.1	RLB Saxon	Berlin	II 11403	Museum Berlin	II 11403
Gröbers-Bennewitz	Germany	2	EBA II	276.2	RLB Saxon	Berlin	II 11402	Museum Berlin	II 11402
Gröbers-Bennewitz	Germany	2	EBA II	273.5	RLB Saxon	Berlin	II 11401	Museum Berlin	II 11401
Gröbers-Bennewitz	Germany	2	EBA II	271.71	RLB Saxon	Berlin	II 11400	Museum Berlin	II 11400
Gröbers-Bennewitz	Germany	2	EBA II	295.49	RLB Saxon	Berlin	II 11399	Museum Berlin	II 11399
Gröbers-Bennewitz	Germany	2	EBA II	283.37	RLB Saxon	Berlin	II 11380	Museum Berlin	II 11380
Gröbers-Bennewitz	Germany	2	EBA II	304.44	RLB Saxon	Berlin	II 11406	Museum Berlin	II 11406
Gröbers-Bennewitz	Germany	2	EBA II	292.85	RLB Saxon	Berlin	II 11366	Museum Berlin	II 11366
Gröbers-Bennewitz	Germany	2	EBA II	261.22	RLB Saxon	Berlin	II 11351	Museum Berlin	II 11351
Gröbers-Bennewitz	Germany	2	EBA II	276.26	RLB Saxon	Berlin	II 11352	Museum Berlin	II 11352
Gröbers-Bennewitz	Germany	2	EBA II	258.22	RLB Saxon	Berlin	II 11353	Museum Berlin	II 11353
Gröbers-Bennewitz	Germany	2	EBA II	229.74	RLB Saxon	Berlin	II 11354	Museum Berlin	II 11354
Gröbers-Bennewitz	Germany	2	EBA II	236.3	RLB Saxon	Berlin	II 11355	Museum Berlin	II 11355
Gröbers-Bennewitz	Germany	2	EBA II	287.5	RLB Saxon	Berlin	II 11356	Museum Berlin	II 11356
Gröbers-Bennewitz	Germany	2	EBA II	199	RLB Saxon	Berlin	II 11357	Museum Berlin	II 11357
Gröbers-Bennewitz	Germany	2	EBA II	273.6	RLB Saxon	Berlin	II 11358	Museum Berlin	II 11358
Gröbers-Bennewitz	Germany	2	EBA II	354.15	RLB Saxon	Berlin	II 11359	Museum Berlin	II 11359
Gröbers-Bennewitz	Germany	2	EBA II	358.15	RLB Saxon	Berlin	II 11360	Museum Berlin	II 11360
Gröbers-Bennewitz	Germany	2	EBA II	277.2	RLB Saxon	Berlin	II 11361	Museum Berlin	II 11361
Gröbers-Bennewitz	Germany	2	EBA II	309.68	RLB Saxon	Berlin	II 11362	Museum Berlin	II 11362
Gröbers-Bennewitz	Germany	2	EBA II	330.25	RLB Saxon	Berlin	II 11363	Museum Berlin	II 11363
Gröbers-Bennewitz	Germany	2	EBA II	295.51	RLB Saxon	Berlin	II 11382	Museum Berlin	II 11382
Gröbers-Bennewitz	Germany	2	EBA II	302.63	RLB Saxon	Berlin	II 11372	Museum Berlin	II 11372
Gröbers-Bennewitz	Germany	2	EBA II	297.11	RLB Saxon	Berlin	II 11379	Museum Berlin	II 11379
Gröbers-Bennewitz	Germany	2	EBA II	319.64	RLB Saxon	Berlin	II 11378	Museum Berlin	II 11378
Gröbers-Bennewitz	Germany	2	EBA II	288.48	RLB Saxon	Berlin	II 11377	Museum Berlin	II 11377
Gröbers-Bennewitz	Germany	2	EBA II	322.82	RLB Saxon	Berlin	II 11376	Museum Berlin	II 11376
Gröbers-Bennewitz	Germany	2	EBA II	305.08	RLB Saxon	Berlin	II 11375	Museum Berlin	II 11375
Gröbers-Bennewitz	Germany	2	EBA II	298.46	RLB Saxon	Berlin	II 11364	Museum Berlin	II 11364
Gröbers-Bennewitz	Germany	2	EBA II	353.27	RLB Saxon	Berlin	II 11373	Museum Berlin	II 11373
Gröbers-Bennewitz	Germany	2	EBA II	320.4	RLB Saxon	Berlin	II 11365	Museum Berlin	II 11365
Gröbers-Bennewitz	Germany	2	EBA II	275.4	RLB Saxon	Berlin	II 11371	Museum Berlin	II 11371
Gröbers-Bennewitz	Germany	2	EBA II	301.95	RLB Saxon	Berlin	II 11370	Museum Berlin	II 11370
Gröbers-Bennewitz	Germany	2	EBA II	282.71	RLB Saxon	Berlin	II 11369	Museum Berlin	II 11369
Gröbers-Bennewitz	Germany	2	EBA II	304.22	RLB Saxon	Berlin	II 11368	Museum Berlin	II 11368
Gröbers-Bennewitz	Germany	2	EBA II	334.65	RLB Saxon	Berlin	II 11367	Museum Berlin	II 11367
Gröbers-Bennewitz	Germany	2	EBA II	321.75	RLB Saxon	Berlin	II 11414	Museum Berlin	II 11414
Gröbers-Bennewitz	Germany	2	EBA II	286.42	RLB Saxon	Berlin	II 11374	Museum Berlin	II 11374
Gröbers-Bennewitz	Germany	2	EBA II	321.9	RLB Saxon	Berlin	II 11462	Museum Berlin	II 11462
Gröbers-Bennewitz	Germany	2	EBA II	291.76	RLB Saxon	Berlin	II 11446	Museum Berlin	II 11446
Gröbers-Bennewitz	Germany	2	EBA II	268.97	RLB Saxon	Berlin	II 11447	Museum Berlin	II 11447
Gröbers-Bennewitz	Germany	2	EBA II	277.51	RLB Saxon	Berlin	II 11448	Museum Berlin	II 11448
Gröbers-Bennewitz	Germany	2	EBA II	247.82	RLB Saxon	Berlin	II 11449	Museum Berlin	II 11449
Gröbers-Bennewitz	Germany	2	EBA II	273.4	RLB Saxon	Berlin	II 11450	Museum Berlin	II 11450
Gröbers-Bennewitz	Germany	2	EBA II	268.95	RLB Saxon	Berlin	II 11451	Museum Berlin	II 11451
Gröbers-Bennewitz	Germany	2	EBA II	327.45	RLB Saxon	Berlin	II 11452	Museum Berlin	II 11452
Gröbers-Bennewitz	Germany	2	EBA II	310.22	RLB Saxon	Berlin	II 11453	Museum Berlin	II 11453
Gröbers-Bennewitz	Germany	2	EBA II	275.28	RLB Saxon	Berlin	II 11454	Museum Berlin	II 11454
Gröbers-Bennewitz	Germany	2	EBA II	285.7	RLB Saxon	Berlin	II 11455	Museum Berlin	II 11455
Gröbers-Bennewitz	Germany	2	EBA II	266.26	RLB Saxon	Berlin	II 11456	Museum Berlin	II 11456
Gröbers-Bennewitz	Germany	2	EBA II	278.33	RLB Saxon	Berlin	II 11457	Museum Berlin	II 11457
Gröbers-Bennewitz	Germany	2	EBA II	270.53	RLB Saxon	Berlin	II 11458	Museum Berlin	II 11458
Gröbers-Bennewitz	Germany	2	EBA II	340	RLB Saxon	Berlin	II 11412	Museum Berlin	II 11412
Gröbers-Bennewitz	Germany	2	EBA II	302	RLB Saxon	Berlin	II 11468	Museum Berlin	II 11468
Gröbers-Bennewitz	Germany	2	EBA II	294.46	RLB Saxon	Berlin	II 11475	Museum Berlin	II 11475
Gröbers-Bennewitz	Germany	2	EBA II	249.26	RLB Saxon	Berlin	II 11474	Museum Berlin	II 11474
Gröbers-Bennewitz	Germany	2	EBA II	307.26	RLB Saxon	Berlin	II 11473	Museum Berlin	II 11473
Gröbers-Bennewitz	Germany	2	EBA II	268.22	RLB Saxon	Berlin	II 11472	Museum Berlin	II 11472
Gröbers-Bennewitz	Germany	2	EBA II	317.92	RLB Saxon	Berlin	II 11471	Museum Berlin	II 11471
Gröbers-Bennewitz	Germany	2	EBA II	289.34	RLB Saxon	Berlin	II 11460	Museum Berlin	II 11460
Gröbers-Bennewitz	Germany	2	EBA II	295.28	RLB Saxon	Berlin	II 11469	Museum Berlin	II 11469
Gröbers-Bennewitz	Germany	2	EBA II	301.35	RLB Saxon	Berlin	II 11461	Museum Berlin	II 11461
Gröbers-Bennewitz	Germany	2	EBA II	342.18	RLB Saxon	Berlin	II 11467	Museum Berlin	II 11467
Gröbers-Bennewitz	Germany	2	EBA II	297.63	RLB Saxon	Berlin	II 11466	Museum Berlin	II 11466
Gröbers-Bennewitz	Germany	2	EBA II	310.23	RLB Saxon	Berlin	II 11465	Museum Berlin	II 11465
Gröbers-Bennewitz	Germany	2	EBA II	289.52	RLB Saxon	Berlin	II 11464	Museum Berlin	II 11464
Gröbers-Bennewitz	Germany	2	EBA II	316.38	RLB Saxon	Berlin	II 11463	Museum Berlin	II 11463
Gröbers-Bennewitz	Germany	2	EBA II	281.47	RLB Saxon	Berlin	II 11443	Museum Berlin	II 11443
Gröbers-Bennewitz	Germany	2	EBA II	302.33	RLB Saxon	Berlin	II 11470	Museum Berlin	II 11470
Gröbers-Bennewitz	Germany	2	EBA II	260.27	RLB Saxon	Berlin	II 11420	Museum Berlin	II 11420
Gröbers-Bennewitz	Germany	2	EBA II	303.57	RLB Saxon	Berlin	II 11445	Museum Berlin	II 11445
Gröbers-Bennewitz	Germany	2	EBA II	298.95	RLB Saxon	Berlin	II 11426	Museum Berlin	II 11426
Gröbers-Bennewitz	Germany	2	EBA II	305.48	RLB Saxon	Berlin	II 11425	Museum Berlin	II 11425
Gröbers-Bennewitz	Germany	2	EBA II	274.21	RLB Saxon	Berlin	II 11424	Museum Berlin	II 11424
Gröbers-Bennewitz	Germany	2	EBA II	290.4	RLB Saxon	Berlin	II 11423	Museum Berlin	II 11423
Gröbers-Bennewitz	Germany	2	EBA II	315.82	RLB Saxon	Berlin	II 11428	Museum Berlin	II 11428
Gröbers-Bennewitz	Germany	2	EBA II	293.95	RLB Saxon	Berlin	II 11421	Museum Berlin	II 11421
Gröbers-Bennewitz	Germany	2	EBA II	301.82	RLB Saxon	Berlin	II 11429	Museum Berlin	II 11429
Gröbers-Bennewitz	Germany	2	EBA II	304.93	RLB Saxon	Berlin	II 11419	Museum Berlin	II 11419
Gröbers-Bennewitz	Germany	2	EBA II	276.8	RLB Saxon	Berlin	II 11418	Museum Berlin	II 11418
Gröbers-Bennewitz	Germany	2	EBA II	320.18	RLB Saxon	Berlin	II 11417	Museum Berlin	II 11417
Gröbers-Bennewitz	Germany	2	EBA II	312.75	RLB Saxon	Berlin	II 11416	Museum Berlin	II 11416
Gröbers-Bennewitz	Germany	2	EBA II	287.03	RLB Saxon	Berlin	II 11415	Museum Berlin	II 11415
Gröbers-Bennewitz	Germany	2	EBA II	271.41	RLB Saxon	Berlin	II 11476	Museum Berlin	II 11476
Gröbers-Bennewitz	Germany	2	EBA II	340.86	RLB Saxon	Berlin	II 11422	Museum Berlin	II 11422
Gröbers-Bennewitz	Germany	2	EBA II	334.03	RLB Saxon	Berlin	II 11436	Museum Berlin	II 11436
Gröbers-Bennewitz	Germany	2	EBA II	264.74	RLB Saxon	Berlin	II 11413	Museum Berlin	II 11413
Gröbers-Bennewitz	Germany	2	EBA II	288.6	RLB Saxon	Berlin	II 11442	Museum Berlin	II 11442
Gröbers-Bennewitz	Germany	2	EBA II	284.22	RLB Saxon	Berlin	II 11441	Museum Berlin	II 11441
Gröbers-Bennewitz	Germany	2	EBA II	272.8	RLB Saxon	Berlin	II 11440	Museum Berlin	II 11440
Gröbers-Bennewitz	Germany	2	EBA II	323	RLB Saxon	Berlin	II 11439	Museum Berlin	II 11439
Gröbers-Bennewitz	Germany	2	EBA II	273.36	RLB Saxon	Berlin	II 11427	Museum Berlin	II 11427
Gröbers-Bennewitz	Germany	2	EBA II	290.93	RLB Saxon	Berlin	II 11437	Museum Berlin	II 11437
Gröbers-Bennewitz	Germany	2	EBA II	306	RLB Saxon	Berlin	II 11444	Museum Berlin	II 11444
Gröbers-Bennewitz	Germany	2	EBA II	328.3	RLB Saxon	Berlin	II 11435	Museum Berlin	II 11435
Gröbers-Bennewitz	Germany	2	EBA II	297.7	RLB Saxon	Berlin	II 11434	Museum Berlin	II 11434
Gröbers-Bennewitz	Germany	2	EBA II	282.45	RLB Saxon	Berlin	II 11433	Museum Berlin	II 11433
Gröbers-Bennewitz	Germany	2	EBA II	310.28	RLB Saxon	Berlin	II 11432	Museum Berlin	II 11432
Gröbers-Bennewitz	Germany	2	EBA II	276.25	RLB Saxon	Berlin	II 11431	Museum Berlin	II 11431
Gröbers-Bennewitz	Germany	2	EBA II	306.62	RLB Saxon	Berlin	II 11430	Museum Berlin	II 11430
Gröbers-Bennewitz	Germany	2	EBA II	282.34	RLB Saxon	Berlin	II 11438	Museum Berlin	II 11438
Habsheim	France	1	MBA	460	RLB Langquaid	Biberach	NA	Abels 1972	PBFIX4-548
Habsheim	France	1	MBA	495	RLB Langquaid	Biberach	NA	Abels 1972	PBFIX4-553
Habsheim	France	1	MBA	550	RLB Langquaid	Biberach	NA	Abels 1972	PBFIX4-309
Habsheim	France	1	MBA	355	RLB Langquaid	Lahr	NA	Abels 1972	PBFIX4-326
Habsheim	France	1	MBA	375	RLB Langquaid	Biberach	NA	Abels 1972	PBFIX4-541
Habsheim	France	1	MBA	490	RLB Langquaid	Biberach	NA	Abels 1972	PBFIX4-542
Habsheim	France	1	MBA	480	RLB Langquaid	Biberach	NA	Abels 1972	PBFIX4-543
Habsheim	France	1	MBA	470	RLB Langquaid	Biberach	NA	Abels 1972	PBFIX4-544
Habsheim	France	1	MBA	465	RLB Langquaid	Biberach	NA	Abels 1972	PBFIX4-545
Habsheim	France	1	MBA	485	RLB Langquaid	Biberach	NA	Abels 1972	PBFIX4-547
Habsheim	France	1	MBA	500	RLB Langquaid	Biberach	NA	Abels 1972	PBFIX4-549
Habsheim	France	1	MBA	470	RLB Langquaid	Biberach	NA	Abels 1972	PBFIX4-550
Habsheim	France	1	MBA	485	RLB Langquaid	Biberach	NA	Abels 1972	PBFIX4-551
Habsheim	France	1	MBA	430	RLB Langquaid	Biberach	NA	Abels 1972	PBFIX4-557
Habsheim	France	1	MBA	500	RLB Langquaid	Biberach	NA	Abels 1972	PBFIX4-546
Habsheim	France	1	MBA	490	RLB Langquaid	Biberach	NA	Abels 1972	PBFIX4-552
Henfenfeld	Germany	1	LBA	468	LPB	Nürnberg	9001/6	Pászthory and Mayer 1998	PBFIX20-647
Henfenfeld	Germany	1	LBA	205	LPB	Nürnberg	9001/15	Pászthory and Mayer 1998	PBFIX20-648
Hindelwangen	Germany	1	EBA I	165	RLB Salez	Hegau-Singen	72	Kienlin 2008	PBFIX04-66
Hindelwangen	Germany	1	EBA I	160	RLB Salez	Hegau-Singen	72	Kienlin 2008	PBFIX04-69
Hindelwangen	Germany	1	EBA I	142	RLB Salez	Stuttgart	7274b	Kienlin 2008	PBFIX04-60, MK 21
Hindelwangen	Germany	1	EBA I	150	RLB Salez	Hegau-Singen	70	Kienlin 2008	PBFIX04-8, MK 20
Hindelwangen	Germany	1	EBA I	155	RLB Salez	Hegau-Singen	70	Kienlin 2008	PBFIX04-7, MK 19
Hippersdorf	Austria	1	MBA	305	RLB Salez	Wien	61485	Mayer 1976	PBFIX09-213
Hippersdorf	Austria	1	MBA	325	ASB	Wien	61481	Mayer 1976	PBFIX09-363
Hippersdorf	Austria	1	MBA	255	ASB	Wien	61483	Mayer 1976	PBFIX09-365
Hippersdorf	Austria	1	MBA	220	ASB	Wien	61491	Mayer 1976	PBFIX09-370
Hippersdorf	Austria	1	MBA	190	ASB	Wien	61490	Mayer 1976	PBFIX09-369
Hippersdorf	Austria	1	MBA	250	ASB	Wien	61489	Mayer 1976	PBFIX09-368
Hippersdorf	Austria	1	MBA	250	ASB	Wien	61488	Mayer 1976	PBFIX09-367
Hippersdorf	Austria	1	MBA	300	ASB	Wien	61484	Mayer 1976	PBFIX09-366
Hippersdorf	Austria	1	MBA	320	ASB	Wien	61482	Mayer 1976	PBFIX09-364
Hippersdorf	Austria	1	MBA	125	ASB	Wien	61492	Mayer 1976	PBFIX09-371
Ittelsburg	Germany	1	MBA	440	RLB	Memmingen	333	Pászthory and Mayer 1998	PBFIX20-162
Ittelsburg	Germany	1	MBA	260	RLB	Memmingen	336	Pászthory and Mayer 1998	PBFIX20-329
Ittelsburg	Germany	1	MBA	460	RLB	Memmingen	332	Pászthory and Mayer 1998	PBFIX20-164
Ittelsburg	Germany	1	MBA	380	RLB	Memmingen	334	Pászthory and Mayer 1998	PBFIX20-161
Ittelsburg	Germany	1	MBA	285	RLB	Memmingen	335	Pászthory and Mayer 1998	PBFIX20-160
Ittelsburg	Germany	1	MBA	500	RLB	Memmingen	331	Pászthory and Mayer 1998	PBFIX20-165
Jičíněves	Czech Republic	1	EBA II	193	RLB Saxon	Prague	14799	Moucha 2007	Moucha 2007, 71:3
Jičíněves	Czech Republic	1	EBA II	180	Special	Kopidlno	A162	Moucha 2007	Moucha 2007, 73:15
Jičíněves	Czech Republic	1	EBA II	216	ASB	Prague	52271	Moucha 2007	Moucha 2007, 71:4
Kappeln	Germany	2	MBA	548.2	ASB	Schleswig	NA	Endrigkeit 2010	UPA178-285.14
Kappeln	Germany	2	MBA	395.5	ASB	Schleswig	NA	Endrigkeit 2010	UPA178-285.15
Kappeln	Germany	2	MBA	541.2	ASB	Schleswig	NA	Endrigkeit 2010	UPA178-285.13
Kappeln	Germany	2	MBA	392.8	ASB	Schleswig	NA	Endrigkeit 2010	UPA178-285.12
Kappeln	Germany	2	MBA	429.5	ASB	Schleswig	NA	Endrigkeit 2010	UPA178-285.11
Kappeln	Germany	2	MBA	431.3	ASB	Schleswig	NA	Endrigkeit 2010	UPA178-285.10
Kappeln	Germany	2	MBA	413.4	ASB	Schleswig	NA	Endrigkeit 2010	UPA178-285.8
Kappeln	Germany	2	MBA	451.9	ASB	Schleswig	NA	Endrigkeit 2010	UPA178-285.7
Kappeln	Germany	2	MBA	496.6	ASB	Schleswig	NA	Endrigkeit 2010	UPA178-285.6
Kappeln	Germany	2	MBA	466	ASB	Schleswig	NA	Endrigkeit 2010	UPA178-285.5
Kappeln	Germany	2	MBA	482.3	ASB	Schleswig	NA	Endrigkeit 2010	UPA178-285.4
Kappeln	Germany	2	MBA	418.9	ASB	Schleswig	NA	Endrigkeit 2010	UPA178-285.3
Kappeln	Germany	2	MBA	500.9	ASB	Schleswig	NA	Endrigkeit 2010	UPA178-285.2
Kappeln	Germany	2	MBA	469.9	ASB	Schleswig	NA	Endrigkeit 2010	UPA178-285.1
Karmin II	Poland	2	LBA	130	TLB	Wroclaw	NA	Kusnierz 1998	PBFIX21-56
Karmin II	Poland	2	LBA	130	TLB	Wroclaw	NA	Kusnierz 1998	PBFIX21-221
Karmin II	Poland	2	LBA	110	TLB	Wroclaw	NA	Kusnierz 1998	PBFIX21-182
Karmin II	Poland	2	LBA	60	TLB	Wroclaw	NA	Kusnierz 1998	PBFIX21-183
Karmin II	Poland	2	LBA	123	TLB	Wroclaw	NA	Kusnierz 1998	PBFIX21-141
Karmin II	Poland	2	LBA	220	TLB	Wroclaw	NA	Kusnierz 1998	PBFIX21-339
Karmin II	Poland	2	LBA	135	TLB	Wroclaw	NA	Kusnierz 1998	PBFIX21-337
Karmin II	Poland	2	LBA	110	TLB	Wroclaw	NA	Kusnierz 1998	PBFIX21-324
Karmin II	Poland	2	LBA	160	TLB	Wroclaw	NA	Kusnierz 1998	PBFIX21-51
Karmin II	Poland	2	LBA	208	TLB	Wroclaw	NA	Kusnierz 1998	PBFIX21-64
Karmin II	Poland	2	LBA	240	TLB	Wroclaw	NA	Kusnierz 1998	PBFIX21-70
Karmin II	Poland	2	LBA	130	TLB	Wroclaw	NA	Kusnierz 1998	PBFIX21-376
Karmin II	Poland	2	LBA	190	TLB	Wroclaw	NA	Kusnierz 1998	PBFIX21-375
Karmin II	Poland	2	LBA	130	TLB	Wroclaw	NA	Kusnierz 1998	PBFIX21-374
Karmin II	Poland	2	LBA	140	TLB	Wroclaw	NA	Kusnierz 1998	PBFIX21-373
Karmin II	Poland	2	LBA	125	TLB	Wroclaw	NA	Kusnierz 1998	PBFIX21-357
Karmin II	Poland	2	LBA	160	TLB	Wroclaw	NA	Kusnierz 1998	PBFIX21-322
Karmin II	Poland	2	LBA	150	TLB	Wroclaw	NA	Kusnierz 1998	PBFIX21-292
Karmin II	Poland	2	LBA	120	TLB	Wroclaw	NA	Kusnierz 1998	PBFIX21-41
Karmin III	Poland	2	LBA	160	TLB	Wroclaw	NA	Kusnierz 1998	PBFIX21-209
Karmin III	Poland	2	LBA	215	TLB	Wroclaw	NA	Kusnierz 1998	PBFIX21-204
Karmin III	Poland	2	LBA	165	TLB	Wroclaw	NA	Kusnierz 1998	PBFIX21-46
Karmin III	Poland	2	LBA	180	TLB	Wroclaw	NA	Kusnierz 1998	PBFIX21-65
Karmin III	Poland	2	LBA	220	TLB	Wroclaw	NA	Kusnierz 1998	PBFIX21-205
Karmin III	Poland	2	LBA	185	TLB	Wroclaw	NA	Kusnierz 1998	PBFIX21-206
Karmin III	Poland	2	LBA	195	TLB	Wroclaw	NA	Kusnierz 1998	PBFIX21-207
Karmin III	Poland	2	LBA	180	TLB	Wroclaw	NA	Kusnierz 1998	PBFIX21-208
Karmin III	Poland	2	LBA	145	TLB	Wroclaw	NA	Kusnierz 1998	PBFIX21-230
Karmin III	Poland	2	LBA	125	TLB	Wroclaw	NA	Kusnierz 1998	PBFIX21-519
Karmin III	Poland	2	LBA	95	TLB	Wroclaw	NA	Kusnierz 1998	PBFIX21-520
Karmin III	Poland	2	LBA	135	TLB	Wroclaw	NA	Kusnierz 1998	PBFIX21-521
Langquaid	Germany	1	EBA II	206	RLB Langquaid	München	1908,75	Own measurements	PBFIX20-143
Langquaid	Germany	1	EBA II	121	RLB Langquaid	München	1908,77	Own measurements	PBFIX20-141
Langquaid	Germany	1	EBA II	292	RLB Langquaid	München	1908,73	Own measurements	PBFIX20-100
Langquaid	Germany	1	EBA II	407	RLB Langquaid	München	1908,72	Own measurements	PBFIX20-100
Langquaid	Germany	1	EBA II	564	RLB Langquaid	München	1908,71	Own measurements	PBFIX20-99
Langquaid	Germany	1	EBA II	192	RLB Langquaid	München	1908,76	Own measurements	PBFIX20-144
Langquaid	Germany	1	EBA II	214	RLB Langquaid	München	1908,74	Own measurements	PBFIX20-142
Linz a.d. Donau	Austria	1	LBA	280	TLB	Linz	A468	Mayer 1976	PBFIX9-1002
Linz a.d. Donau	Austria	1	LBA	710	LPB	Linz	A466[8]	Mayer 1976	PBFIX9-889
Linz a.d. Donau	Austria	1	LBA	680	LPB late	Linz	A459/2	Mayer 1976	PBFIX9-728
Linz a.d. Donau	Austria	1	LBA	600	LPB late	Linz	A460	Mayer 1976	PBFIX9-729
Linz a.d. Donau	Austria	1	LBA	230	LPB	Linz	A646	Mayer 1976	PBFIX9-768
Linz a.d. Donau	Austria	1	LBA	660	LPB late	Linz	A458	Mayer 1976	PBFIX9-730
Mahrersdorf	Austria	1	LBA	415	TLB	Wien	34779	Mayer 1977	PBFIX09-1067
Mahrersdorf	Austria	1	LBA	715	LPB late	Graz	34777	Mayer 1977	PBFIX09-725
Mahrersdorf	Austria	1	LBA	670	LPB late	Wien	34777 b.	Mayer 1977	PBFIX09-724
Mahrersdorf	Austria	1	LBA	175	TLB	Wien	34781	Mayer 1977	PBFIX09-1176
Mahrersdorf	Austria	1	LBA	670	LPB	Wien	34776	Mayer 1977	PBFIX09-918
Mahrersdorf	Austria	1	LBA	260	LPB late	Wien	34778	Mayer 1977	PBFIX09-759
Mahrersdorf	Austria	1	LBA	420	TLB	Wien	34779	Mayer 1977	PBFIX09-1068
Mahrersdorf	Austria	1	LBA	420	TLB	Wien	34779	Mayer 1977	PBFIX09-1069
Mahrersdorf	Austria	1	LBA	330	TLB	Wien	34780	Mayer 1977	PBFIX09-1070
Mengen	Germany	1	EBA I	150	RLB Salez	Stuttgart	A216-b	Abels 1972; Stein 1979	PBFIX4-58
Mengen	Germany	1	EBA I	135	RLB Salez	Stuttgart	A216-c	Abels 1972; Stein 1979	PBFIX4-59
Mengen	Germany	1	EBA I	135	RLB Salez	Stuttgart	A216-a	Abels 1972; Stein 1979	PBFIX4-57
Neukloster I	Germany	2	MBA	392	ASB	Hannover	M132	Own measurements	PBFIX23-347
Neukloster I	Germany	2	MBA	452	ASB	Hannover	M136	Own measurements	PBFIX23-356
Neukloster I	Germany	2	MBA	461	ASB	Hannover	M139	Own measurements	PBFIX23-361
Neukloster I	Germany	2	MBA	446	ASB	Hannover	M137	Own measurements	PBFIX23-360
Neukloster I	Germany	2	MBA	451	ASB	Hannover	M141	Own measurements	PBFIX23-359
Neukloster I	Germany	2	MBA	452	ASB	Hannover	M138	Own measurements	PBFIX23-355
Neukloster I	Germany	2	MBA	413	ASB	Hannover	M133	Own measurements	PBFIX23-343
Neukloster I	Germany	2	MBA	427	ASB	Hannover	M135	Own measurements	PBFIX23-357
Neukloster I	Germany	2	MBA	435	ASB	Hannover	M140	Own measurements	PBFIX23-358
Neukloster I	Germany	2	MBA	392	ASB	Hannover	M134	Own measurements	PBFIX23-288
Neyruz	Switzerland	1	EBA I	320	RLB Salez	Lausanne	24602	Abels 1972	PBFIX4-105
Neyruz	Switzerland	1	EBA I	490	RLB Salez	Lausanne	24603	Abels 1972	PBFIX4-120
Neyruz	Switzerland	1	EBA I	520	RLB Salez	Lausanne	24604	Abels 1972	PBFIX4-121
Neyruz	Switzerland	1	EBA I	375	RLB Salez	Lausanne	24605	Abels 1972	PBFIX4-130
Neyruz	Switzerland	1	EBA I	215	RLB Salez	Lausanne	24601	Abels 1972	PBFIX4-104
Niederosterwitz	Austria	1	EBA II	275	RLB Salez	Klagenfurt	5830/8	Mayer 1976	PBFIX09-189
Niederosterwitz	Austria	1	EBA II	250	RLB Salez	Villach	NA	Mayer 1976	PBFIX09-190
Niederosterwitz	Austria	1	EBA II	270	RLB Salez	Klagenfurt	5830/14	Mayer 1976	PBFIX09-192
Niederosterwitz	Austria	1	EBA II	270	RLB Salez	Klagenfurt	5830/6	Mayer 1976	PBFIX09-191
Niederosterwitz	Austria	1	EBA II	270	RLB Salez	Klagenfurt	5830/21	Mayer 1976	PBFIX09-214
Niederosterwitz	Austria	1	EBA II	270	RLB Salez	Klagenfurt	5830/16	Mayer 1976	PBFIX09-195
Niederosterwitz	Austria	1	EBA II	275	RLB Salez	Klagenfurt	5830/7	Mayer 1976	PBFIX09-193
Niederosterwitz	Austria	1	EBA II	290	RLB Salez	Klagenfurt	5830/5	Mayer 1976	PBFIX09-196
Niederosterwitz	Austria	1	EBA II	280	RLB Salez	Klagenfurt	5830/1	Mayer 1976	PBFIX09-198
Niederosterwitz	Austria	1	EBA II	280	RLB Salez	Klagenfurt	5830/4	Mayer 1976	PBFIX09-199
Niederosterwitz	Austria	1	EBA II	280	RLB Salez	Klagenfurt	5830/9	Mayer 1976	PBFIX09-200
Niederosterwitz	Austria	1	EBA II	280	RLB Salez	Klagenfurt	5830/12	Mayer 1976	PBFIX09-201
Niederosterwitz	Austria	1	EBA II	280	RLB Salez	Klagenfurt	5830/11	Mayer 1976	PBFIX09-202
Niederosterwitz	Austria	1	EBA II	270	RLB Salez	Klagenfurt	5830/13	Mayer 1976	PBFIX09-203
Niederosterwitz	Austria	1	EBA II	270	RLB Salez	Klagenfurt	5830/3	Mayer 1976	PBFIX09-204
Niederosterwitz	Austria	1	EBA II	290	RLB Salez	Klagenfurt	5830/2	Mayer 1976	PBFIX09-205
Niederosterwitz	Austria	1	EBA II	270	RLB Salez	Klagenfurt	5830/10	Mayer 1976	PBFIX09-206
Niederosterwitz	Austria	1	EBA II	280	RLB Salez	Klagenfurt	5830/15	Mayer 1976	PBFIX09-208
Niederosterwitz	Austria	1	EBA II	270	RLB Salez	Klagenfurt	6414	Mayer 1976	PBFIX09-300
Niederosterwitz	Austria	1	EBA II	290	RLB Salez	Klagenfurt	5830/20	Mayer 1976	PBFIX09-207
Ostenfeld	Germany	2	MBA	373.9	ASB	Schleswig	NA	Endrigkeit 2010	UPA178-210.30
Ostenfeld	Germany	2	MBA	383.5	ASB	Schleswig	NA	Endrigkeit 2010	UPA178-210.19
Ostenfeld	Germany	2	MBA	277.6	ASB	Schleswig	NA	Endrigkeit 2010	UPA178-210.16
Ostenfeld	Germany	2	MBA	384.6	ASB	Schleswig	NA	Endrigkeit 2010	UPA178-210.15
Ostenfeld	Germany	2	MBA	324.7	ASB	Schleswig	NA	Endrigkeit 2010	UPA178-210.14
Ostenfeld	Germany	2	MBA	449	ASB	Schleswig	NA	Endrigkeit 2010	UPA178-210.19
Ostenfeld	Germany	2	MBA	436.3	ASB	Schleswig	NA	Endrigkeit 2010	UPA178-210.11
Ostenfeld	Germany	2	MBA	368.3	ASB	Schleswig	NA	Endrigkeit 2010	UPA178-210.10
Ostenfeld	Germany	2	MBA	382.5	ASB	Schleswig	NA	Endrigkeit 2010	UPA178-210.7
Ostenfeld	Germany	2	MBA	356.4	ASB	Schleswig	NA	Endrigkeit 2010	UPA178-210.8
Ostenfeld	Germany	2	MBA	388	ASB	Schleswig	NA	Endrigkeit 2010	UPA178-210.31
Ostenfeld	Germany	2	MBA	217.5	ASB	Schleswig	NA	Endrigkeit 2010	UPA178-210.1
Ostenfeld	Germany	2	MBA	178.1	ASB	Schleswig	NA	Endrigkeit 2010	UPA178-210.2
Ostenfeld	Germany	2	MBA	213.7	ASB	Schleswig	NA	Endrigkeit 2010	UPA178-210.3
Ostenfeld	Germany	2	MBA	183	ASB	Schleswig	NA	Endrigkeit 2010	UPA178-210.4
Ostenfeld	Germany	2	MBA	340.7	ASB	Schleswig	NA	Endrigkeit 2010	UPA178-210.5
Ostenfeld	Germany	2	MBA	304.4	ASB	Schleswig	NA	Endrigkeit 2010	UPA178-210.6
Ostenfeld	Germany	2	MBA	345.8	ASB	Schleswig	NA	Endrigkeit 2010	UPA178-210.9
Ostenfeld	Germany	2	MBA	519.8	ASB	Schleswig	NA	Endrigkeit 2010	UPA178-210.28
Ostenfeld	Germany	2	MBA	385.4	ASB	Schleswig	NA	Endrigkeit 2010	UPA178-210.24
Ostenfeld	Germany	2	MBA	556.8	ASB	Schleswig	NA	Endrigkeit 2010	UPA178-210.23
Ostenfeld	Germany	2	MBA	308.4	ASB	Schleswig	NA	Endrigkeit 2010	UPA178-210.22
Ostenfeld	Germany	2	MBA	367.3	ASB	Schleswig	NA	Endrigkeit 2010	UPA178-210.20
Ostenfeld	Germany	2	MBA	552.5	ASB	Schleswig	NA	Endrigkeit 2010	UPA178-210.25
Ostenfeld	Germany	2	MBA	346.7	ASB	Schleswig	NA	Endrigkeit 2010	UPA178-210.17
Paitzkofen	Germany	1	MBA	290	ASB	Landsut	NA	Berger 1985; Pászthory and Mayer 1998	JHVSU87-2 / PBFIX20-386A
Paitzkofen	Germany	1	MBA	215	ASB	Landsut	NA	Berger 1985; Pászthory and Mayer 1998	JHVSU87-10 / PBFIX20-386G
Paitzkofen	Germany	1	MBA	380	ASB	Landsut	NA	Berger 1985; Pászthory and Mayer 1998	JHVSU87-9 / PBFIX20-386F
Paitzkofen	Germany	1	MBA	380	ASB	Landsut	NA	Berger 1985; Pászthory and Mayer 1998	JHVSU87-8 / PBFIX20-386E
Paitzkofen	Germany	1	MBA	230	RLB Langquaid	Landsut	NA	Berger 1985; Pászthory and Mayer 1998	JHVSU87-7 / PBFIX20-113
Paitzkofen	Germany	1	MBA	275	ASB	Landsut	NA	Berger 1985; Pászthory and Mayer 1998	JHVSU87-6 / PBFIX20-386D
Paitzkofen	Germany	1	MBA	300	ASB	Landsut	NA	Berger 1985; Pászthory and Mayer 1998	JHVSU87-5
Paitzkofen	Germany	1	MBA	380	ASB	Landsut	NA	Berger 1985; Pászthory and Mayer 1998	JHVSU87-3 / PBFIX20-386B
Paitzkofen	Germany	1	MBA	305	ASB	Landsut	NA	Berger 1985; Pászthory and Mayer 1998	JHVSU87-4 / PBFIX20-386C
Pilszcz	Poland	2	EBA II	260	RLB	Wroclaw	NA	Szpunar 1987	PBFIX16-456
Pilszcz	Poland	2	EBA II	255	RLB Saxon	Wroclaw	I/?	Szpunar 1987	PBFIX16-252
Pilszcz	Poland	2	EBA II	188	RLB Saxon	Wroclaw	I/21	Szpunar 1987	PBFIX16-223
Pilszcz	Poland	2	EBA II	396	RLB Saxon	Wroclaw	I/7	Szpunar 1987	PBFIX16-110
Pilszcz	Poland	2	EBA II	306	RLB Saxon	Wroclaw	I/8	Szpunar 1987	PBFIX16-216
Pilszcz	Poland	2	EBA II	275	RLB Saxon	Wroclaw	I/10	Szpunar 1987	PBFIX16-217
Pilszcz	Poland	2	EBA II	241	RLB Saxon	Wroclaw	no number	Szpunar 1987	PBFIX16-218
Pilszcz	Poland	2	EBA II	320	RLB Saxon	Wroclaw	I/12	Szpunar 1987	PBFIX16-219
Pilszcz	Poland	2	EBA II	267	RLB Saxon	Wroclaw	I/14	Szpunar 1987	PBFIX16-220
Pilszcz	Poland	2	EBA II	202	RLB Saxon	Wroclaw	I/17	Szpunar 1987	PBFIX16-254
Pilszcz	Poland	2	EBA II	257	RLB Saxon	Wroclaw	I/18	Szpunar 1987	PBFIX16-222
Pilszcz	Poland	2	EBA II	165	RLB Saxon	Wroclaw	I/6	Szpunar 1987	PBFIX16-253
Pilszcz	Poland	2	EBA II	214	RLB Saxon	Wroclaw	I/19	Szpunar 1987	PBFIX16-229
Pilszcz	Poland	2	EBA II	413	RLB Saxon	Wroclaw	I/9	Szpunar 1987	PBFIX16-242
Pilszcz	Poland	2	EBA II	532	RLB Saxon	Wroclaw	I/11	Szpunar 1987	PBFIX16-243
Pilszcz	Poland	2	EBA II	385	RLB Saxon	Wroclaw	I/15	Szpunar 1987	PBFIX16-244
Pilszcz	Poland	2	EBA II	208	RLB Löffel	Wroclaw	I/4	Szpunar 1987	PBFIX16-248
Pilszcz	Poland	2	EBA II	506	RLB Saxon	Wroclaw	I/5	Szpunar 1987	PBFIX16-241
Pilszcz	Poland	2	EBA II	283	RLB Saxon	Wroclaw	I/16	Szpunar 1987	PBFIX16-221
Pilszcz	Poland	2	EBA II	305	RLB Saxon	Wroclaw	I/13	Szpunar 1987	PBFIX16-228
Regensburg-Hochweg	Germany	1	EBA II	275	RLB	Regensburg	1937/158 o	Pászthory and Mayer 1998	PBFIX20-211
Regensburg-Hochweg	Germany	1	EBA II	420	RLB Salez	Regensburg	1937/158 i	Pászthory and Mayer 1998	PBFIX20-156
Regensburg-Hochweg	Germany	1	EBA II	295	RLB Salez	Regensburg	1937/158 f	Pászthory and Mayer 1998	PBFIX20-157
Regensburg-Hochweg	Germany	1	EBA II	300	ASB	Regensburg	1937/158 t	Pászthory and Mayer 1998	PBFIX20-375
Regensburg-Hochweg	Germany	1	EBA II	435	ASB	Regensburg	1937/158 s	Pászthory and Mayer 1998	PBFIX20-374
Regensburg-Hochweg	Germany	1	EBA II	280	RLB	Regensburg	1937/158 l	Pászthory and Mayer 1998	PBFIX20-215
Regensburg-Hochweg	Germany	1	EBA II	290	RLB	Regensburg	1937/158 n	Pászthory and Mayer 1998	PBFIX20-214
Regensburg-Hochweg	Germany	1	EBA II	265	RLB Salez	Regensburg	1937/158 c	Pászthory and Mayer 1998	PBFIX20-158
Regensburg-Hochweg	Germany	1	EBA II	275	RLB	Regensburg	1937/158 p	Pászthory and Mayer 1998	PBFIX20-212
Regensburg-Hochweg	Germany	1	EBA II	460	RLB Salez	Regensburg	1937/158 e	Pászthory and Mayer 1998	PBFIX20-153
Regensburg-Hochweg	Germany	1	EBA II	265	RLB	Regensburg	1937/158 g	Pászthory and Mayer 1998	PBFIX20-210
Regensburg-Hochweg	Germany	1	EBA II	270	RLB	Regensburg	1937/158 k	Pászthory and Mayer 1998	PBFIX20-209
Regensburg-Hochweg	Germany	1	EBA II	240	RLB	Regensburg	1937/158 m	Pászthory and Mayer 1998	PBFIX20-208
Regensburg-Hochweg	Germany	1	EBA II	280	RLB	Regensburg	1937/288	Pászthory and Mayer 1998	PBFIX20-207
Regensburg-Hochweg	Germany	1	EBA II	365	RLB Salez	Regensburg	1937/158 h	Pászthory and Mayer 1998	PBFIX20-159
Regensburg-Hochweg	Germany	1	EBA II	275	RLB	Regensburg	1937/158 r	Pászthory and Mayer 1998	PBFIX20-213
Regensburg-Hochweg	Germany	1	EBA II	385	RLB Salez	Regensburg	1937/158 d	Pászthory and Mayer 1998	PBFIX20-152
Regensburg-Hochweg	Germany	1	EBA II	250	RLB	Regensburg	1937/158	Pászthory and Mayer 1998	PBFIX20-96
Regensburg-Hochweg	Germany	1	EBA II	430	RLB Salez	Regensburg	1937/158 g	Pászthory and Mayer 1998	PBFIX20-154
Regensburg-Hochweg	Germany	1	EBA II	380	RLB Salez	Regensburg	1937/158 b	Pászthory and Mayer 1998	PBFIX20-155
Reinhardshofen	Germany	1	LBA	290	LPB early	Ansbach	NA	Pászthory and Mayer 1998	PBFIX20-898
Reinhardshofen	Germany	1	LBA	420	LPB	Ansbach	NA	Pászthory and Mayer 1998	PBFIX20-609
Reinhardshofen	Germany	1	LBA	370	LPB	Ansbach	NA	Pászthory and Mayer 1998	PBFIX20-610
Reinhardshofen	Germany	1	LBA	495	LPB early	Ansbach	NA	Pászthory and Mayer 1998	PBFIX20-893
Reinhardshofen	Germany	1	LBA	420	LPB early	Ansbach	NA	Pászthory and Mayer 1998	PBFIX20-894
Reinhardshofen	Germany	1	LBA	370	LPB early	Ansbach	NA	Pászthory and Mayer 1998	PBFIX20-895
Reinhardshofen	Germany	1	LBA	350	LPB early	Ansbach	NA	Pászthory and Mayer 1998	PBFIX20-897
Reinhardshofen	Germany	1	LBA	220	LPB early	Ansbach	NA	Pászthory and Mayer 1998	PBFIX20-899
Reinhardshofen	Germany	1	LBA	295	LPB early	Ansbach	NA	Pászthory and Mayer 1998	PBFIX20-900
Reinhardshofen	Germany	1	LBA	290	LPB early	Ansbach	NA	Pászthory and Mayer 1998	PBFIX20-901
Reinhardshofen	Germany	1	LBA	220	LPB early	Ansbach	NA	Pászthory and Mayer 1998	PBFIX20-902
Reinhardshofen	Germany	1	LBA	340	LPB early	Ansbach	NA	Pászthory and Mayer 1998	PBFIX20-896
Reupelsdorf	Germany	1	LBA	370	LPB early	Würzburg	NA	Pászthory and Mayer 1998	PBFIX20-890
Reupelsdorf	Germany	1	LBA	390	LPB early	Würzburg	NA	Pászthory and Mayer 1998	PBFIX20-879
Reupelsdorf	Germany	1	LBA	340	LPB early	Würzburg	NA	Pászthory and Mayer 1998	PBFIX20-880
Reupelsdorf	Germany	1	LBA	410	LPB early	Würzburg	NA	Pászthory and Mayer 1998	PBFIX20-881
Reupelsdorf	Germany	1	LBA	320	LPB early	Würzburg	NA	Pászthory and Mayer 1998	PBFIX20-882
Reupelsdorf	Germany	1	LBA	140	TLB	Würzburg	40.5	Pászthory and Mayer 1998	PBFIX20-1034
Reupelsdorf	Germany	1	LBA	180	TLB	Würzburg	40.5	Pászthory and Mayer 1998	PBFIX20-1033
Reupelsdorf	Germany	1	LBA	340	LPB early	Würzburg	NA	Pászthory and Mayer 1998	PBFIX20-878
Reupelsdorf	Germany	1	LBA	300	LPB early	Würzburg	NA	Pászthory and Mayer 1998	PBFIX20-892
Reupelsdorf	Germany	1	LBA	370	LPB early	Würzburg	NA	Pászthory and Mayer 1998	PBFIX20-891
Reupelsdorf	Germany	1	LBA	430	LPB early	Würzburg	NA	Pászthory and Mayer 1998	PBFIX20-888
Reupelsdorf	Germany	1	LBA	375	LPB early	Würzburg	NA	Pászthory and Mayer 1998	PBFIX20-887
Reupelsdorf	Germany	1	LBA	325	LPB early	Würzburg	NA	Pászthory and Mayer 1998	PBFIX20-886
Reupelsdorf	Germany	1	LBA	300	LPB early	Würzburg	NA	Pászthory and Mayer 1998	PBFIX20-885
Reupelsdorf	Germany	1	LBA	370	LPB early	Würzburg	NA	Pászthory and Mayer 1998	PBFIX20-884
Reupelsdorf	Germany	1	LBA	400	LPB early	Würzburg	NA	Pászthory and Mayer 1998	PBFIX20-883
Reupelsdorf	Germany	1	LBA	340	LPB early	Würzburg	NA	Pászthory and Mayer 1998	PBFIX20-873
Reupelsdorf	Germany	1	LBA	170	LPB	Würzburg	34	Pászthory and Mayer 1998	PBFIX20-922
Reupelsdorf	Germany	1	LBA	330	LPB early	Würzburg	NA	Pászthory and Mayer 1998	PBFIX20-877
Reupelsdorf	Germany	1	LBA	385	LPB early	Würzburg	NA	Pászthory and Mayer 1998	PBFIX20-876
Reupelsdorf	Germany	1	LBA	330	LPB early	Würzburg	NA	Pászthory and Mayer 1998	PBFIX20-875
Reupelsdorf	Germany	1	LBA	295	LPB early	Würzburg	NA	Pászthory and Mayer 1998	PBFIX20-874
Reupelsdorf	Germany	1	LBA	335	LPB early	Würzburg	NA	Pászthory and Mayer 1998	PBFIX20-889
Saarburg-Trassem	Germany	1	MBA	353	RLB	Trier	01,345	Stein 1979; Kibbert 1980	PBFIX10-400
Saarburg-Trassem	Germany	1	MBA	255	RLB Löffel	Trier	01,347	Stein 1979; Kibbert 1980	PBFIX10-155
Saarburg-Trassem	Germany	1	MBA	478	RLB Langquaid	Trier	01,346	Stein 1979; Kibbert 1980	PBFIX10-383
Saarburg-Trassem	Germany	1	MBA	420	RLB Langquaid	Trier	01,343	Stein 1979; Kibbert 1980	PBFIX10-384
Saarburg-Trassem	Germany	1	MBA	263	RLB	Trier	01,342	Stein 1979; Kibbert 1980	PBFIX10-158
Saarburg-Trassem	Germany	1	MBA	396	RLB Langquaid	Trier	01,344	Stein 1979; Kibbert 1980	PBFIX10-382
Saběnice	Czech Republic	1	LBA	572	LPB	Most	NA	Blazek and Hansen 1997	BUFN4-9.34
Saběnice	Czech Republic	1	LBA	580	LPB	Most	NA	Blazek and Hansen 1997	BUFN4-11.43
Saběnice	Czech Republic	1	LBA	528	LPB	Most	NA	Blazek and Hansen 1997	BUFN4-9.33
Saběnice	Czech Republic	1	LBA	570	LPB	Most	NA	Blazek and Hansen 1997	BUFN4-10.38
Saběnice	Czech Republic	1	LBA	372	LPB	Most	NA	Blazek and Hansen 1997	BUFN4-9.35
Saběnice	Czech Republic	1	LBA	566	LPB	Most	NA	Blazek and Hansen 1997	BUFN4-3.10
Saběnice	Czech Republic	1	LBA	448	LPB	Most	NA	Blazek and Hansen 1997	BUFN4-9.36
Saběnice	Czech Republic	1	LBA	566	LPB	Most	NA	Blazek and Hansen 1997	BUFN4-3.9
Saběnice	Czech Republic	1	LBA	576	LPB	Most	NA	Blazek and Hansen 1997	BUFN4-10.37
Saběnice	Czech Republic	1	LBA	658	LPB	Most	NA	Blazek and Hansen 1997	BUFN4-8.32
Saběnice	Czech Republic	1	LBA	542	LPB	Most	NA	Blazek and Hansen 1997	BUFN4-7.26
Saběnice	Czech Republic	1	LBA	572	LPB	Most	NA	Blazek and Hansen 1997	BUFN4-12.47
Saběnice	Czech Republic	1	LBA	568	LPB	Most	NA	Blazek and Hansen 1997	BUFN4-14.54
Saběnice	Czech Republic	1	LBA	548	LPB	Most	NA	Blazek and Hansen 1997	BUFN4-14.53
Saběnice	Czech Republic	1	LBA	550	LPB	Most	NA	Blazek and Hansen 1997	BUFN4-13.52
Saběnice	Czech Republic	1	LBA	566	LPB	Most	NA	Blazek and Hansen 1997	BUFN4-13.51
Saběnice	Czech Republic	1	LBA	564	LPB	Most	NA	Blazek and Hansen 1997	BUFN4-13.50
Saběnice	Czech Republic	1	LBA	558	LPB	Most	NA	Blazek and Hansen 1997	BUFN4-11.41
Saběnice	Czech Republic	1	LBA	568	LPB	Most	NA	Blazek and Hansen 1997	BUFN4-12.48
Saběnice	Czech Republic	1	LBA	576	LPB	Most	NA	Blazek and Hansen 1997	BUFN4-10.39
Saběnice	Czech Republic	1	LBA	570	LPB	Most	NA	Blazek and Hansen 1997	BUFN4-12.46
Saběnice	Czech Republic	1	LBA	584	LPB	Most	NA	Blazek and Hansen 1997	BUFN4-12.45
Saběnice	Czech Republic	1	LBA	576	LPB	Most	NA	Blazek and Hansen 1997	BUFN4-11.44
Saběnice	Czech Republic	1	LBA	564	LPB	Most	NA	Blazek and Hansen 1997	BUFN4-11.42
Saběnice	Czech Republic	1	LBA	454	LPB	Most	NA	Blazek and Hansen 1997	BUFN4-8.31
Saběnice	Czech Republic	1	LBA	580	LPB	Most	NA	Blazek and Hansen 1997	BUFN4-10.40
Saběnice	Czech Republic	1	LBA	556	LPB	Most	NA	Blazek and Hansen 1997	BUFN4-13.49
Saběnice	Czech Republic	1	LBA	570	LPB	Most	NA	Blazek and Hansen 1997	BUFN4-1.4
Saběnice	Czech Republic	1	LBA	606	LPB	Most	NA	Blazek and Hansen 1997	BUFN4-1.1
Saběnice	Czech Republic	1	LBA	480	LPB	Most	NA	Blazek and Hansen 1997	BUFN4-19.76
Saběnice	Czech Republic	1	LBA	556	LPB	Most	NA	Blazek and Hansen 1997	BUFN4-4.15
Saběnice	Czech Republic	1	LBA	584	LPB	Most	NA	Blazek and Hansen 1997	BUFN4-14.55
Saběnice	Czech Republic	1	LBA	558	LPB	Most	NA	Blazek and Hansen 1997	BUFN4-4.16
Saběnice	Czech Republic	1	LBA	544	LPB	Most	NA	Blazek and Hansen 1997	BUFN4-5.17
Saběnice	Czech Republic	1	LBA	550	LPB	Most	NA	Blazek and Hansen 1997	BUFN4-5.18
Saběnice	Czech Republic	1	LBA	536	LPB	Most	NA	Blazek and Hansen 1997	BUFN4-5.19
Saběnice	Czech Republic	1	LBA	548	LPB	Most	NA	Blazek and Hansen 1997	BUFN4-5.20
Saběnice	Czech Republic	1	LBA	548	LPB	Most	NA	Blazek and Hansen 1997	BUFN4-6.21
Saběnice	Czech Republic	1	LBA	592	LPB	Most	NA	Blazek and Hansen 1997	BUFN4-1.2
Saběnice	Czech Republic	1	LBA	546	LPB	Most	NA	Blazek and Hansen 1997	BUFN4-7.25
Saběnice	Czech Republic	1	LBA	550	LPB	Most	NA	Blazek and Hansen 1997	BUFN4-6.22
Saběnice	Czech Republic	1	LBA	520	LPB	Most	NA	Blazek and Hansen 1997	BUFN4-8.30
Saběnice	Czech Republic	1	LBA	550	LPB	Most	NA	Blazek and Hansen 1997	BUFN4-6.23
Saběnice	Czech Republic	1	LBA	588	LPB	Most	NA	Blazek and Hansen 1997	BUFN4-2.5
Saběnice	Czech Republic	1	LBA	478	LPB	Most	NA	Blazek and Hansen 1997	BUFN4-2.8
Saběnice	Czech Republic	1	LBA	478	LPB	Most	NA	Blazek and Hansen 1997	BUFN4-2.6
Saběnice	Czech Republic	1	LBA	492	LPB	Most	NA	Blazek and Hansen 1997	BUFN4-2.7
Saběnice	Czech Republic	1	LBA	550	LPB	Most	NA	Blazek and Hansen 1997	BUFN4-4.14
Saběnice	Czech Republic	1	LBA	428	LPB	Most	NA	Blazek and Hansen 1997	BUFN4-4.13
Saběnice	Czech Republic	1	LBA	462	LPB	Most	NA	Blazek and Hansen 1997	BUFN4-3.12
Saběnice	Czech Republic	1	LBA	532	LPB	Most	NA	Blazek and Hansen 1997	BUFN4-3.11
Saběnice	Czech Republic	1	LBA	542	LPB	Most	NA	Blazek and Hansen 1997	BUFN4-6.24
Saběnice	Czech Republic	1	LBA	524	LPB	Most	NA	Blazek and Hansen 1997	BUFN4-7.28
Saběnice	Czech Republic	1	LBA	530	LPB	Most	NA	Blazek and Hansen 1997	BUFN4-8.29
Saběnice	Czech Republic	1	LBA	596	LPB	Most	NA	Blazek and Hansen 1997	BUFN4-1.3
Saběnice	Czech Republic	1	LBA	512	LPB	Most	NA	Blazek and Hansen 1997	BUFM4-20.77
Saběnice	Czech Republic	1	LBA	572	LPB	Most	NA	Blazek and Hansen 1997	BUFN4-14.56
Saběnice	Czech Republic	1	LBA	562	LPB	Most	NA	Blazek and Hansen 1997	BUFN4-6.27
Saběnice	Czech Republic	1	LBA	578	ASB	Most	NA	Blazek and Hansen 1997	BUFN4-20.79
Saběnice	Czech Republic	1	LBA	398	LPB	Most	NA	Blazek and Hansen 1997	BUFN4-19.74
Saběnice	Czech Republic	1	LBA	598	ASB	Most	NA	Blazek and Hansen 1997	BUFN4-20.78
Saběnice	Czech Republic	1	LBA	230	LPB	Most	NA	Blazek and Hansen 1997	BUFN4-19.75
Saběnice	Czech Republic	1	LBA	480	LPB	Most	NA	Blazek and Hansen 1997	BUFN4-19.73
Saběnice	Czech Republic	1	LBA	546	LPB	Most	NA	Blazek and Hansen 1997	BUFN4-18.72
Saběnice	Czech Republic	1	LBA	516	LPB	Most	NA	Blazek and Hansen 1997	BUFN4-18.71
Saběnice	Czech Republic	1	LBA	460	LPB	Most	NA	Blazek and Hansen 1997	BUFN4-18.70
Saběnice	Czech Republic	1	LBA	510	LPB	Most	NA	Blazek and Hansen 1997	BUFN4-18.69
Saběnice	Czech Republic	1	LBA	550	LPB	Most	NA	Blazek and Hansen 1997	BUFN4-16.61
Saběnice	Czech Republic	1	LBA	560	LPB	Most	NA	Blazek and Hansen 1997	BUFN4-17.68
Saběnice	Czech Republic	1	LBA	572	LPB	Most	NA	Blazek and Hansen 1997	BUFN4-15.57
Saběnice	Czech Republic	1	LBA	594	LPB	Most	NA	Blazek and Hansen 1997	BUFN4-15.58
Saběnice	Czech Republic	1	LBA	574	LPB	Most	NA	Blazek and Hansen 1997	BUFN4-15.60
Saběnice	Czech Republic	1	LBA	564	LPB	Most	NA	Blazek and Hansen 1997	BUFN4-16.62
Saběnice	Czech Republic	1	LBA	572	LPB	Most	NA	Blazek and Hansen 1997	BUFN4-16.63
Saběnice	Czech Republic	1	LBA	560	LPB	Most	NA	Blazek and Hansen 1997	BUFN4-16.64
Saběnice	Czech Republic	1	LBA	578	LPB	Most	NA	Blazek and Hansen 1997	BUFN4-17.65
Saběnice	Czech Republic	1	LBA	580	LPB	Most	NA	Blazek and Hansen 1997	BUFN4-17.66
Saběnice	Czech Republic	1	LBA	552	LPB	Most	NA	Blazek and Hansen 1997	BUFN4-17.67
Saběnice	Czech Republic	1	LBA	586	LPB	Most	NA	Blazek and Hansen 1997	BUFN4-15.59
Schönberg bei Niederwolz	Austria	1	LBA	300	LPB late	Graz	15097	Mayer 1977	PBFIX09-823
Schönberg bei Niederwolz	Austria	1	LBA	445	LPB early	Graz	15096	Mayer 1977	PBFIX09-786
Schönberg bei Niederwolz	Austria	1	LBA	600	LPB early	Graz	15098	Mayer 1977	PBFIX09-785
Schönberg bei Niederwolz	Austria	1	LBA	390	LPB early	Graz	15095	Mayer 1977	PBFIX09-784
Schönberg bei Niederwolz	Austria	1	LBA	415	LPB early	Graz	15094	Mayer 1977	PBFIX09-783
Sennewald-Salez	Switzerland	1	EBA I	202	RLB Salez	St. Gallen	103	Abels 1972; Bill 1985, 1997	PBFIX04-78
Sennewald-Salez	Switzerland	1	EBA I	275	RLB Salez	St. Gallen	104	Abels 1972; Bill 1985, 1997	PBFIX04-79
Sennewald-Salez	Switzerland	1	EBA I	217.7	RLB Salez	St. Gallen	107	Abels 1972; Bill 1985, 1997	WJB10-1
Sennewald-Salez	Switzerland	1	EBA I	218.4	RLB Salez	St. Gallen	108	Abels 1972; Bill 1985, 1997	WJB10-2
Sennewald-Salez	Switzerland	1	EBA I	219.4	RLB Salez	St. Gallen	110	Abels 1972; Bill 1985, 1997	WJB10-3
Sennewald-Salez	Switzerland	1	EBA I	219.6	RLB Salez	St. Gallen	NA	Abels 1972; Bill 1985, 1997	WJB10-4
Sennewald-Salez	Switzerland	1	EBA I	217	RLB Salez	Neuchâtel	NA	Abels 1972; Bill 1985, 1997	PBFIX04-27/WJB10-27
Sennewald-Salez	Switzerland	1	EBA I	220	RLB Salez	Bern	9911	Abels 1972; Bill 1985, 1997	PBFIX04-30/WJB10-21
Sennewald-Salez	Switzerland	1	EBA I	220	RLB Salez	Bregenz	569	Abels 1972; Bill 1985, 1997	PBFIX04-29/WJB10-16
Sennewald-Salez	Switzerland	1	EBA I	220	RLB Salez	Neuchâtel	NA	Abels 1972; Bill 1985, 1997	PBFIX04-28/WJB10-28
Sennewald-Salez	Switzerland	1	EBA I	220	RLB Salez	Chur	IIIB54	Abels 1972; Bill 1985, 1997	PBFIX04-35
Sennewald-Salez	Switzerland	1	EBA I	211.9	RLB Salez	St. Gallen	NA	Abels 1972; Bill 1985, 1997	WJB10-5
Sennewald-Salez	Switzerland	1	EBA I	235	RLB Salez	St. Gallen	102	Abels 1972; Bill 1985, 1997	PBFIX04-77
Sennewald-Salez	Switzerland	1	EBA I	190	RLB Salez	St. Gallen	101	Abels 1972; Bill 1985, 1997	PBFIX04-76
Sennewald-Salez	Switzerland	1	EBA I	226	RLB Salez	Bern	9913	Abels 1972; Bill 1985, 1997	PBFIX04-50/WJB10-24
Sennewald-Salez	Switzerland	1	EBA I	224	RLB Salez	Bern	9910	Abels 1972; Bill 1985, 1997	PBFIX04-49/WJB10-22
Sennewald-Salez	Switzerland	1	EBA I	226	RLB Salez	Bern	9909	Abels 1972; Bill 1985, 1997	PBFIX04-48/WJB10-26
Sennewald-Salez	Switzerland	1	EBA I	229	RLB Salez	Bern	9908	Abels 1972; Bill 1985, 1997	PBFIX04-47/WJB10-25
Sennewald-Salez	Switzerland	1	EBA I	215	RLB Salez	Zürich	15514	Abels 1972; Bill 1985, 1997	PBFIX04-25/WJB10-31
Sennewald-Salez	Switzerland	1	EBA I	225	RLB Salez	Chur	IIIB55	Abels 1972; Bill 1985, 1997	PBFIX04-36
Sennewald-Salez	Switzerland	1	EBA I	220	RLB Salez	Chur	IIIB53	Abels 1972; Bill 1985, 1997	PBFIX04-34
Sennewald-Salez	Switzerland	1	EBA I	215	RLB Salez	Chur	IIIB52	Abels 1972; Bill 1985, 1997	PBFIX04-33
Sennewald-Salez	Switzerland	1	EBA I	220	RLB Salez	Chur	IIIB51	Abels 1972; Bill 1985, 1997	PBFIX04-32
Sennewald-Salez	Switzerland	1	EBA I	215	RLB Salez	Chur	IIIB56	Abels 1972; Bill 1985, 1997	PBFIX04-37
Sennewald-Salez	Switzerland	1	EBA I	215	RLB Salez	British	94.7-27.1	Abels 1972; Bill 1985, 1997	WJB10-20
Sennewald-Salez	Switzerland	1	EBA I	226	RLB Salez	Bern	9912	Abels 1972; Bill 1985, 1997	PBFIX04-31/WJB10-23
Sennewald-Salez	Switzerland	1	EBA I	214.9	RLB Salez	Zürich	23893	Abels 1972; Bill 1985, 1997	WJB10-29
Sennewald-Salez	Switzerland	1	EBA I	215	RLB Salez	Konstanz Ros.	NA	Abels 1972; Bill 1985, 1997	PBFIX04-22/WJB10-12
Sennewald-Salez	Switzerland	1	EBA I	210	RLB Salez	Konstanz Ros.	NA	Abels 1972; Bill 1985, 1997	PBFIX04-21/WJB10-11
Sennewald-Salez	Switzerland	1	EBA I	215.9	RLB Salez	Wien	8403C	Abels 1972; Bill 1985, 1997	WJB10-19
Sennewald-Salez	Switzerland	1	EBA I	217.8	RLB Salez	Wien	8403B	Abels 1972; Bill 1985, 1997	WJB10-18
Sennewald-Salez	Switzerland	1	EBA I	220.2	RLB Salez	Wien	8403A	Abels 1972; Bill 1985, 1997	WJB10-17
Sennewald-Salez	Switzerland	1	EBA I	218.9	RLB Salez	Innsbruck	609	Abels 1972; Bill 1985, 1997	WJB10-14
Sennewald-Salez	Switzerland	1	EBA I	215	RLB Salez	Private Property	SLM52748	Abels 1972; Bill 1985, 1997	WJB10-8
Sennewald-Salez	Switzerland	1	EBA I	215.05	RLB Salez	St. Gallen	NA	Abels 1972; Bill 1985, 1997	WJB10-7
Sennewald-Salez	Switzerland	1	EBA I	220.8	RLB Salez	St. Gallen	NA	Abels 1972; Bill 1985, 1997	WJB10-6
Sennewald-Salez	Switzerland	1	EBA I	205	RLB Salez	Konstanz Ros.	NA	Abels 1972; Bill 1985, 1997	PBFIX04-23/WJB10-13
Sennewald-Salez	Switzerland	1	EBA I	215	RLB Salez	Zürich	2335.5	Abels 1972; Bill 1985, 1997	PBFIX04-24/WJB10-30
Sennewald-Salez	Switzerland	1	EBA I	217.6	RLB Salez	Innsbruck	606	Abels 1972; Bill 1985, 1997	WJB10-15
Sigriswil-Ringoldswil	Switzerland	1	EBA II	140	RLB	Bern	9867	Abels 1972	PBFIX4-508
Sigriswil-Ringoldswil	Switzerland	1	EBA II	134	RLB Löffel	Bern	46	Abels 1972	PBFIX4-192
Sigriswil-Ringoldswil	Switzerland	1	EBA II	177	RLB Löffel	Bern	9866	Abels 1972	PBFIX4-206
Sigriswil-Ringoldswil	Switzerland	1	EBA II	176	RLB	Bern	10350	Abels 1972	PBFIX4-297
Sigriswil-Ringoldswil	Switzerland	1	EBA II	235	RLB	Bern	9870	Abels 1972	PBFIX4-505
Sigriswil-Ringoldswil	Switzerland	1	EBA II	105	RLB	Bern	9872	Abels 1972	PBFIX4-239
Sigriswil-Ringoldswil	Switzerland	1	EBA II	328	RLB	Bern	9871	Abels 1972	PBFIX4-506
Sigriswil-Ringoldswil	Switzerland	1	EBA II	230	RLB	Zürich	2335-4	Abels 1972	PBFIX4-507
Sigriswil-Ringoldswil	Switzerland	1	EBA II	257	RLB Langquaid	Bern	9868	Abels 1972	PBFIX4-273
Smørumovre	Denmark	3	MBA	287	ASB	Copenhagen	NA	Johannsen 2015	BAR2015-Ke 354:49
Smørumovre	Denmark	3	MBA	482	ASB	Copenhagen	NA	Johannsen 2015	BAR2015-Ke 354:19
Smørumovre	Denmark	3	MBA	480	ASB	Copenhagen	NA	Johannsen 2015	BAR2015-Ke 354:29
Smørumovre	Denmark	3	MBA	542	ASB	Copenhagen	NA	Johannsen 2015	BAR2015-Ke 354:28
Smørumovre	Denmark	3	MBA	473	ASB	Copenhagen	NA	Johannsen 2015	BAR2015-Ke 354:27
Smørumovre	Denmark	3	MBA	460	ASB	Copenhagen	NA	Johannsen 2015	BAR2015-Ke 354:26
Smørumovre	Denmark	3	MBA	405	ASB	Copenhagen	NA	Johannsen 2015	BAR2015-Ke 354:25
Smørumovre	Denmark	3	MBA	433	ASB	Copenhagen	NA	Johannsen 2015	BAR2015-Ke 354:24
Smørumovre	Denmark	3	MBA	358	ASB	Copenhagen	NA	Johannsen 2015	BAR2015-Ke 354:36
Smørumovre	Denmark	3	MBA	487	ASB	Copenhagen	NA	Johannsen 2015	BAR2015-Ke 354:23
Smørumovre	Denmark	3	MBA	450	ASB	Copenhagen	NA	Johannsen 2015	BAR2015-Ke 354:22
Smørumovre	Denmark	3	MBA	477	ASB	Copenhagen	NA	Johannsen 2015	BAR2015-Ke 354:30
Smørumovre	Denmark	3	MBA	465	ASB	Copenhagen	NA	Johannsen 2015	BAR2015-Ke 354:20
Smørumovre	Denmark	3	MBA	471	ASB	Copenhagen	NA	Johannsen 2015	BAR2015-Ke 354:16
Smørumovre	Denmark	3	MBA	459	ASB	Copenhagen	NA	Johannsen 2015	BAR2015-Ke 354:18
Smørumovre	Denmark	3	MBA	487	ASB	Copenhagen	NA	Johannsen 2015	BAR2015-Ke 354:17
Smørumovre	Denmark	3	MBA	481	ASB	Copenhagen	NA	Johannsen 2015	BAR2015-Ke 354:15
Smørumovre	Denmark	3	MBA	492	ASB	Copenhagen	NA	Johannsen 2015	BAR2015-Ke 354:12
Smørumovre	Denmark	3	MBA	197	ASB	Copenhagen	NA	Johannsen 2015	BAR2015-Ke 354: 8
Smørumovre	Denmark	3	MBA	256	RLB	Copenhagen	NA	Johannsen 2015	BAR2015-Ke 354:6
Smørumovre	Denmark	3	MBA	215	RLB	Copenhagen	NA	Johannsen 2015	BAR2015-Ke 354:3
Smørumovre	Denmark	3	MBA	298	ASB	Copenhagen	106	Johannsen 2015	BAR2015-106
Smørumovre	Denmark	3	MBA	299	ASB	Copenhagen	NA	Johannsen 2015	BAR2015-Ke 354:51
Smørumovre	Denmark	3	MBA	454	ASB	Copenhagen	NA	Johannsen 2015	BAR2015-Ke 354:21
Smørumovre	Denmark	3	MBA	426	TLB	Copenhagen	NA	Johannsen 2015	BAR2015-Ke 354:57
Smørumovre	Denmark	3	MBA	270	ASB	Copenhagen	105	Johannsen 2015	BAR2015-105
Smørumovre	Denmark	3	MBA	254	ASB	Copenhagen	NA	Johannsen 2015	BAR2015-Ke 354:13
Smørumovre	Denmark	3	MBA	412	ASB	Copenhagen	NA	Johannsen 2015	BAR2015-Ke 354:31
Smørumovre	Denmark	3	MBA	270	ASB	Copenhagen	B15006	Johannsen 2015	BAR2015-B15006
Smørumovre	Denmark	3	MBA	266	ASB	Copenhagen	B14996	Johannsen 2015	BAR2015-B14996
Smørumovre	Denmark	3	MBA	278	ASB	Copenhagen	B1491	Johannsen 2015	BAR2015-B1491
Smørumovre	Denmark	3	MBA	265	ASB	Copenhagen	104	Johannsen 2015	BAR2015-104
Smørumovre	Denmark	3	MBA	258	ASB	Copenhagen	Ul1378	Johannsen 2015	BAR2015-Ul1378
Smørumovre	Denmark	3	MBA	291	ASB	Copenhagen	NA	Johannsen 2015	BAR2015-Ke 354:50
Smørumovre	Denmark	3	MBA	278	ASB	Copenhagen	NA	Johannsen 2015	BAR2015-Ke 354L48
Smørumovre	Denmark	3	MBA	270	ASB	Copenhagen	NA	Johannsen 2015	BAR2015-Ke 354:47
Smørumovre	Denmark	3	MBA	252	ASB	Copenhagen	NA	Johannsen 2015	BAR2015-Ke 354:38
Smørumovre	Denmark	3	MBA	255	ASB	Copenhagen	NA	Johannsen 2015	BAR2015-Ke 354:34
Smørumovre	Denmark	3	MBA	274	ASB	Copenhagen	NA	Johannsen 2015	BAR2015-Ke 354:46
Smørumovre	Denmark	3	MBA	328	ASB	Copenhagen	NA	Johannsen 2015	BAR2015-Ke 354:33
Smørumovre	Denmark	3	MBA	258	ASB	Copenhagen	NA	Johannsen 2015	BAR2015-Ke 354:37
Smørumovre	Denmark	3	MBA	268	ASB	Copenhagen	NA	Johannsen 2015	BAR2015-Ke 354:39
Smørumovre	Denmark	3	MBA	476	ASB	Copenhagen	NA	Johannsen 2015	BAR2015-Ke 354:41
Smørumovre	Denmark	3	MBA	442	ASB	Copenhagen	NA	Johannsen 2015	BAR2015-Ke 354:32
Smørumovre	Denmark	3	MBA	322	ASB	Copenhagen	NA	Johannsen 2015	BAR2015-Ke 354:42
Smørumovre	Denmark	3	MBA	284	ASB	Copenhagen	NA	Johannsen 2015	BAR2015-Ke 354:43
Smørumovre	Denmark	3	MBA	266	ASB	Copenhagen	NA	Johannsen 2015	BAR2015-Ke 354:45
Smørumovre	Denmark	3	MBA	390	ASB	Copenhagen	NA	Johannsen 2015	BAR2015-Ke 354:35
Soběchleby	Czech Republic	1	EBA II	386	RLB Saxon	Wien	14376/2	Moucha 2007	Moucha 2007, 190.37
Soběchleby	Czech Republic	1	EBA II	438	RLB Saxon	Wien	14354	Moucha 2007	Moucha 2007, 190.41
Soběchleby	Czech Republic	1	EBA II	407	RLB Saxon	Wien	14355	Moucha 2007	Moucha 2007, 190:34
Soběchleby	Czech Republic	1	EBA II	348	RLB Saxon	Wien	14356	Moucha 2007	Moucha 2007, 190.35
Soběchleby	Czech Republic	1	EBA II	225	RLB Saxon	Wien	14357	Moucha 2007	Moucha 2007, 190.33
Soběchleby	Czech Republic	1	EBA II	210	RLB Saxon	Wien	14358	Moucha 2007	Moucha 2007, 190.30
Soběchleby	Czech Republic	1	EBA II	238	RLB Saxon	Wien	14359	Moucha 2007	Moucha 2007, 190.31
Soběchleby	Czech Republic	1	EBA II	223	RLB Saxon	Wien	14360	Moucha 2007	Moucha 2007, 190.32
Soběchleby	Czech Republic	1	EBA II	271	RLB Saxon	Wien	14363	Moucha 2007	Moucha 2007, 190.27
Soběchleby	Czech Republic	1	EBA II	382	RLB Saxon	Wien	20985	Moucha 2007	Moucha 2007, 190.38
Soběchleby	Czech Republic	1	EBA II	230	RLB Saxon	Wien	NA	Moucha 2007	Moucha 2007, 191.42
Soběchleby	Czech Republic	1	EBA II	373	RLB Saxon	Wien	14362	Moucha 2007	Moucha 2007, 190.29
Soběchleby	Czech Republic	1	EBA II	381	RLB Saxon	Wien	20986	Moucha 2007	Moucha 2007, 190.36
Soběchleby	Czech Republic	1	EBA II	218	RLB Saxon	Wien	14361	Moucha 2007	Moucha 2007, 190.39
Soběchleby	Czech Republic	1	EBA II	279	RLB Saxon	Prague	J.I. 12	Moucha 2007	Moucha 2007, 191.52
Soběchleby	Czech Republic	1	EBA II	212	RLB Saxon	Prague	52281	Moucha 2007	Moucha 2007, 191.44
Soběchleby	Czech Republic	1	EBA II	312	RLB Saxon	Prague	52282	Moucha 2007	Moucha 2007, 191.45
Soběchleby	Czech Republic	1	EBA II	398	RLB Saxon	Prague	52280	Moucha 2007	Moucha 2007, 191.46
Soběchleby	Czech Republic	1	EBA II	384	RLB Saxon	Wien	20987	Moucha 2007	Moucha 2007, 190.28
Soběnice	Czech Republic	1	EBA I	209	RLB Saxon	Prague	13876	Moucha 2007	Moucha 2007, 131.18
Soběnice	Czech Republic	1	EBA I	225	RLB Saxon	Prague	13894	Moucha 2007	Moucha 2007, 133.29
Soběnice	Czech Republic	1	EBA I	249	RLB Saxon	Prague	13879	Moucha 2007	Moucha 2007, 132.22
Soběnice	Czech Republic	1	EBA I	210	RLB Saxon	Prague	13877	Moucha 2007	Moucha 2007, 131.16
Soběnice	Czech Republic	1	EBA I	213	RLB Saxon	Prague	13871	Moucha 2007	Moucha 2007, 131.10
Soběnice	Czech Republic	1	EBA I	260	RLB Saxon	Prague	13875	Moucha 2007	Moucha 2007, 132.19
Soběnice	Czech Republic	1	EBA I	194	RLB Saxon	Prague	13874	Moucha 2007	Moucha 2007, 132.20
Soběnice	Czech Republic	1	EBA I	245	RLB Saxon	Prague	13873	Moucha 2007	Moucha 2007, 131.15
Soběnice	Czech Republic	1	EBA I	180	RLB Saxon	Prague	13872	Moucha 2007	Moucha 2007, 131.12
Soběnice	Czech Republic	1	EBA I	400	RLB Saxon	Prague	13867	Moucha 2007	Moucha 2007, 130.9
Soběnice	Czech Republic	1	EBA I	183	RLB Saxon	Prague	13868	Moucha 2007	Moucha 2007, 131.13
Soběnice	Czech Republic	1	EBA I	171	RLB Saxon	Prague	13869	Moucha 2007	Moucha 2007, 130.5
Soběnice	Czech Republic	1	EBA I	145	RLB Saxon	Prague	13870	Moucha 2007	Moucha 2007, 132.26
Soběnice	Czech Republic	1	EBA I	446	RLB Saxon	Prague	13878	Moucha 2007	Moucha 2007, 133.28
Soběnice	Czech Republic	1	EBA I	186	RLB Saxon	Prague	13884	Moucha 2007	Moucha 2007, 130.6
Soběnice	Czech Republic	1	EBA I	187	RLB Saxon	Prague	13888	Moucha 2007	Moucha 2007, 131.14
Soběnice	Czech Republic	1	EBA I	183	RLB Saxon	Prague	13889	Moucha 2007	Moucha 2007, 130.1
Soběnice	Czech Republic	1	EBA I	240	RLB Saxon	Prague	13887	Moucha 2007	Moucha 2007, 132.25
Soběnice	Czech Republic	1	EBA I	232	RLB Saxon	Prague	13881	Moucha 2007	Moucha 2007, 130.2
Soběnice	Czech Republic	1	EBA I	180	RLB Saxon	Prague	13885	Moucha 2007	Moucha 2007, 131.17
Soběnice	Czech Republic	1	EBA I	210	RLB Saxon	Prague	13890	Moucha 2007	Moucha 2007, 132.23
Soběnice	Czech Republic	1	EBA I	250	RLB Saxon	Prague	13891	Moucha 2007	Moucha 2007, 130.8
Soběnice	Czech Republic	1	EBA I	269	RLB Saxon	Prague	13892	Moucha 2007	Moucha 2007, 132.21
Soběnice	Czech Republic	1	EBA I	178	RLB Saxon	Prague	13880	Moucha 2007	Moucha 2007, 132.24
Soběnice	Czech Republic	1	EBA I	266	RLB Saxon	Prague	13893	Moucha 2007	Moucha 2007, 131.11
Soběnice	Czech Republic	1	EBA I	232	RLB Saxon	Prague	13883	Moucha 2007	Moucha 2007, 130.3
Soběnice	Czech Republic	1	EBA I	212	RLB Saxon	Prague	13882	Moucha 2007	Moucha 2007, 132.27
Soběnice	Czech Republic	1	EBA I	198	RLB Saxon	Prague	13886	Moucha 2007	Moucha 2007, 130.4
Stade-Campe	Germany	2	MBA	428	ASB	Stade	NA	Laux 2000	PBFIX23-371
Stade-Campe	Germany	2	MBA	463	ASB	Stade	NA	Laux 2000	PBFIX23-366
Stade-Campe	Germany	2	MBA	170	ASB	Stade	NA	Laux 2000	PBFIX23-367
Stade-Campe	Germany	2	MBA	487	ASB	Stade	NA	Laux 2000	PBFIX23-368
Stade-Campe	Germany	2	MBA	431	ASB	Stade	NA	Laux 2000	PBFIX23-372
Stade-Campe	Germany	2	MBA	430	ASB	Stade	NA	Laux 2000	PBFIX23-373
Stade-Campe	Germany	2	MBA	415	ASB	Stade	NA	Laux 2000	PBFIX23-374
Stade-Campe	Germany	2	MBA	439	ASB	Stade	NA	Laux 2000	PBFIX23-375
Stade-Campe	Germany	2	MBA	491	ASB	Stade	NA	Laux 2000	PBFIX23-348
Stade-Campe	Germany	2	MBA	369	ASB	Stade	NA	Laux 2000	PBFIX-369
Stade-Campe	Germany	2	MBA	492	ASB	Stade	NA	Laux 2000	PBFIX23-370
Vaihingen a.d. Enz	Germany	1	EBA I	430	RLB Langquaid	Stuttgart	2267b	Abels 1972; Stein 1979	PBFIX4-270
Vaihingen a.d. Enz	Germany	1	EBA I	367	RLB Langquaid	Stuttgart	2267a	Abels 1972; Stein 1979	PBFIX4-267
Vaihingen a.d. Enz	Germany	1	EBA I	350	RLB Langquaid	Stuttgart	2267d	Abels 1972; Stein 1979	PBFIX4-269
Vaihingen a.d. Enz	Germany	1	EBA I	425	RLB Langquaid	Stuttgart	2267c	Abels 1972; Stein 1979	PBFIX4-271
Vaihingen a.d. Enz	Germany	1	EBA I	360	RLB Langquaid	Stuttgart	2267e	Abels 1972; Stein 1979	PBFIX4-268
Waging am See	Germany	1	EBA II	416	RLB Langquaid	München	NM 1920.3	Own measurements	PBFIX20-119
Waging am See	Germany	1	EBA II	369	RLB Langquaid	München	NM 3546	Own measurements	PBFIX20-118
Waging am See	Germany	1	EBA II	412	RLB Langquaid	München	NM 3547	Own measurements	PBFIX20-117
Waging am See	Germany	1	EBA II	368	RLB Langquaid	München	NM 1904.1	Own measurements	PBFIX20-116
Waging am See	Germany	1	EBA II	418	RLB Langquaid	München	NM 13.1422	Own measurements	PBFIX20-115
Waging am See	Germany	1	EBA II	431	RLB Langquaid	München	NM 13.1425	Own measurements	PBFIX20-114
Zapfendorf	Germany	1	LBA	625	LPB	Bayreuth	NA	Pászthory and Mayer 1998	PBFIX20-559
Zapfendorf	Germany	1	LBA	630	LPB	Hannover KM	3376	Pászthory and Mayer 1998	PBFIX20-575
Zapfendorf	Germany	1	LBA	415	LPB	München	EM 274	Pászthory and Mayer 1998	PBFIX20-569
Zapfendorf	Germany	1	LBA	410	LPB	München	1908, 105	Pászthory and Mayer 1998	PBFIX20-568
Zapfendorf	Germany	1	LBA	425	LPB	München	1908, 104	Pászthory and Mayer 1998	PBFIX20-567
Zapfendorf	Germany	1	LBA	420	LPB	Würzburg	H 1097	Pászthory and Mayer 1998	PBFIX20-565
Zapfendorf	Germany	1	LBA	450	LPB	Würzburg	H 519	Pászthory and Mayer 1998	PBFIX20-564
Zapfendorf	Germany	1	LBA	685	LPB	Coburg	NA	Pászthory and Mayer 1998	PBFIX20-560
Zapfendorf	Germany	1	LBA	610	LPB	Nürnberg GM	V/A 1235; V/K 6072	Pászthory and Mayer 1998	PBFIX20-590
Zapfendorf	Germany	1	LBA	586	LPB	München	IV 622	Pászthory and Mayer 1998	PBFIX20-589
Zapfendorf	Germany	1	LBA	571	LPB	München	IV 619	Pászthory and Mayer 1998	PBFIX20-588
Zapfendorf	Germany	1	LBA	563	LPB	München	IV 620	Pászthory and Mayer 1998	PBFIX20-587
Zapfendorf	Germany	1	LBA	614	LPB	München	IV 618	Pászthory and Mayer 1998	PBFIX20-586
Zapfendorf	Germany	1	LBA	574	LPB	München	IV 623	Pászthory and Mayer 1998	PBFIX20-585
Zapfendorf	Germany	1	LBA	638	LPB	München	IV 621	Pászthory and Mayer 1998	PBFIX20-584
Zapfendorf	Germany	1	LBA	445	LPB	Würzburg	H 37	Pászthory and Mayer 1998	PBFIX20-563

## Sheet: Hoards with rings or ribs
Location	Country	Region	Zone	Latitude	Longitude	Museum	Source
Alzgern	Germany	South Germany	1	48.243056	12.747222	Private Property	Lenerz- de Wilde documentation; Möslein 2008
Amselfing	Germany	South Germany	1	48.860758	12.656834	Straubing	Lenerz- de Wilde documentation
Andechs-Erling	Germany	South Germany	1	47.968	11.181	Munich	Lenerz- de Wilde 2002
Aschering	Germany	South Germany	1	47.966667	11.25	Munich	Lenerz- de Wilde documentation
Asparn an der Zaya	Austria	Austria	1	48.217778	16.483333	Vienna	Lenerz- de Wilde documentation
Aspersdorf	Austria	Austria	1	48.5627	16.0807	Hollabrunn	Lenerz- de Wilde documentation
Baiern-Piusheim	Germany	South Germany	1	47.958	11.898	Munich	Menke 1978/1979
Bedřichovice	Czech Republic	Bohemia	1	49.180278	16.720556	Brno	Lenerz- de Wilde documentation
Bergheim-Viehausen	Austria	Austria	1	47.840278	13.022222	Salzburg	Lenerz- de Wilde documentation
Bermatingen	Germany	South Germany	1	47.729167	9.35	Konstanz	Lenerz- de Wilde documentation
Bernhaupten	Germany	South Germany	1	47.82515	12.59298	Munich	Lenerz- de Wilde documentation
Blažim	Czech Republic	Bohemia	1	50.407222	13.627222	České Budějovice	Moucha 2005
Blučina	Czech Republic	Moravia	1	49.054993	16.644503	Brno	Lenerz- de Wilde documentation
Bresinchen	Germany	Middle Germany	2	52	14.695833	Brandenburg	Lenerz- de Wilde documentation
Bubeneč	Czech Republic	Bohemia	1	50.104722	14.398333	Prague 2	Moucha 2005
Carsdorf (Pegau)	Germany	Middle Germany	2	51.166631	12.254685	Leipzig	Lenerz- de Wilde documentation
Čelákovice	Czech Republic	Bohemia	1	50.160451	14.75012	Čelákovice	Moucha 2005
Dieskau	Germany	Middle Germany	2	51.435176	12.042046	Halle	Lenerz- de Wilde documentation
Dobročkovice	Czech Republic	Moravia	1	49.162952	17.109005	Brno	Lenerz- de Wilde documentation
Dresden-Prohlis	Germany	Middle Germany	2	51.006528	13.7986	Dresden	Lenerz- de Wilde documentation
Dušníky nad Vltavou	Czech Republic	Bohemia	1	50.311111	14.339444	Prague//Roudnice nad Labem	Moucha 2005
Ebersdorf an den Zaya	Austria	Austria	1	48.589167	16.644722	Vienna	Lenerz- de Wilde documentation
Fürth	Austria	Austria	1	48.366667	15.6	Vienna	Lenerz- de Wilde documentation
Gammersham	Germany	South Germany	1	48.05	12.266667	Munich	Lenerz- de Wilde documentation
Geitzendorf	Austria	Austria	1	48.477778	16.206111	Vienna	Lenerz- de Wilde documentation
Glogów Milana	Poland	Poland	2	51.666667	16.083333	Głogów	Lenerz- de Wilde documentation
Granowo	Poland	Poland	2	52.222	16.528	Poznań	Lenerz- de Wilde documentation
Greding	Germany	South Germany	1	49.045833	11.3525	Greding	Lenerz- de Wilde documentation
Hagelstadt	Germany	South Germany	1	48.895833	12.216944	Munich//Regensburg	Lenerz- de Wilde documentation
Harmannsdorf	Austria	Austria	1	48.391667	16.371111	Vienna	Lenerz- de Wilde documentation
Havalda	Czech Republic	Bohemia	1	48.8	14.3	České Budějovice	Moucha 2005
Hechendorf	Germany	South Germany	1	48.033889	11.186389	Munich	Lenerz- de Wilde documentation
Heignkam	Germany	South Germany	1	47.883333	11.7	Munich	Lenerz- de Wilde documentation
Heimhilgen	Germany	South Germany	1	47.954	12.467	Traunstein//Trostberg	Menke 1978/1979
Hengensberg-Altenufer	Germany	South Germany	1	48.768	13.051	Deggendorf	Schmotz 1984
Heřmaň	Czech Republic	Bohemia	1	49.232554	14.135471	Prague//Horažďovice//Písek	Lenerz- de Wilde documentation
Hospozín	Czech Republic	Bohemia	1	50.306958	14.171845	Prague	Lenerz- de Wilde documentation
Ittling	Germany	South Germany	1	48.881944	12.635	Straubing	Lenerz- de Wilde documentation
Jaroslavice	Czech Republic	Moravia	1	48.756609	16.233506	České Budějovice	Lenerz- de Wilde documentation
Jičiněves	Czech Republic	Bohemia	1	50.37313	15.337371	Prague//Prague 2	Lenerz- de Wilde documentation
Jiřikovice	Czech Republic	Moravia	1	49.16674	16.758004	Brno	Lenerz- de Wilde documentation
Kaufering	Germany	South Germany	1	48.088333	10.856389	Munich	Lenerz- de Wilde documentation
Kilb	Austria	Austria	1	48.1	15.405556	Asparn	Lauermann and Pernicka 2013; Lenerz- de Wilde documentation
Klein-Pöchlarn	Austria	Austria	1	48.216667	15.216667	Vienna	Lenerz- de Wilde documentation
Kleinschweibarth (Drasenhofen)	Austria	Austria	1	48.75	16.65	Asparn	Lenerz- de Wilde documentation
Kobylí	Czech Republic	Moravia	1	48.932881	16.891586	Brno	Lenerz- de Wilde documentation
Kolín	Czech Republic	Bohemia	1	50.028194	15.200634	Berlin Ethn.//Kalinigrad//Dobruška	Moucha 2005
Köschinger Forst	Germany	South Germany	1	48.810833	11.500833	Private Property	Lenerz- de Wilde documentation
Kosov	Czech Republic	Bohemia	1	48.879722	14.420833	České Budějovice	Lenerz- de Wilde documentation
Kostice	Czech Republic	Moravia	1	48.746871	16.978678	Brno	Lenerz- de Wilde documentation
Kottgeisering	Germany	South Germany	1	48.116667	11.133333	Munich	Lenerz- de Wilde documentation
Krtely	Czech Republic	Bohemia	1	49.084444	14.169722	Prague	Moucha 2005
Krumbach	Germany	South Germany	1	48.240	10.372	Munich//Nuremberg	Lenerz- de Wilde documentation
Langesöd	Germany	South Germany	1	47.935	12.929	Munich	Menke 1978/1979
Leithen bei Weng	Austria	Austria	1	48.235453	13.178799	Linz	Lenerz- de Wilde documentation
Lengfelden	Austria	Austria	1	47.844997	13.045311	Salzburg	Lenerz- de Wilde documentation
Lesonice	Czech Republic	Moravia	1	49.00329	16.310638	Vienna	Lenerz- de Wilde documentation
Litoměřice	Czech Republic	Bohemia	1	50.533559	14.131899	Most	Moucha 2005
Lochen	Austria	Austria	1	48.016667	13.183333	Vienna	Lenerz- de Wilde documentation
Lukavec (okres Litoměřice)	Czech Republic	Bohemia	1	50.501723	14.085788	Litoměřice	Moucha 2005
Luštěnice	Czech Republic	Bohemia	1	50.323021	14.936756	Mladá Boleslav//Dobrovice	Moucha 2005
Mainburg	Germany	South Germany	1	48.641944	11.783611	Mainburg	Menke 1978/1979; Stein 1979
Makotřasy	Czech Republic	Bohemia	1	50.144561	14.214772	Prague	Moucha 2005
Marefy	Czech Republic	Moravia	1	49.146389	16.972222	Brno	Lenerz- de Wilde documentation
Mauthausen	Germany	South Germany	1	48.241944	14.516944	Bad Reichenhall	Lenerz- de Wilde documentation; Menke 1987/1979
Mikulov	Czech Republic	Moravia	1	48.805587	16.637789	Brno	Lenerz- de Wilde documentation
Milevsko	Czech Republic	Bohemia	1	49.450972	14.36004	Prague ARÚ	Moucha 2005
Mittermühle (Mainburg)	Germany	South Germany	1	48.641944	11.783611	Munich	Lenerz- de Wilde documentation
Mladé	Czech Republic	Bohemia	1	48.9577	14.4926	České Budějovice	Lenerz- de Wilde documentation
Mondsee	Austria	Austria	1	47.856667	13.351667	Vienna	Lenerz- de Wilde documentation
München-Luitpoldpark	Germany	South Germany	1	48.169444	11.569167	Munich	Lenerz- de Wilde documentation
Mürfelndorf (Pöggstall)	Austria	Austria	1	48.316667	15.201667	Vienna	Lenerz- de Wilde documentation
Neutraubling	Germany	South Germany	1	48.993611	12.195278	Regensburg	Lenerz- de Wilde documentation
Nieder-Neundorf	Germany	Middle Germany	2	51.313889	14.997222	Görlitz	Lenerz- de Wilde documentation
Niederscheyern	Germany	South Germany	1	48.519167	11.4825	Munich//Nuremberg	Lenerz- de Wilde documentation
Nové Vráto	Czech Republic	Bohemia	1	48.988027	14.526927	České Budějovice	Moucha 2005
Obereching	Austria	Austria	1	47.969	12.891	Salzburg	Moolsteiner and Maoesta 1988
Obermarkersdorf	Austria	Austria	1	48.716667	15.9	Private Property	Lauermann and Pernicka 2013
Oberretzbach	Austria	Austria	1	48.766667	15.983333	Hollabrunn	Lenerz- de Wilde documentation
Orlishausen	Germany	Middle Germany	2	51.155556	11.191944	Halle	Lenerz- de Wilde documentation
Osterfeld	Germany	Middle Germany	2	51.604167	7.519167	Halle	Lenerz- de Wilde documentation
Otvovice	Czech Republic	Bohemia	1	50.211639	14.273	Kladno	Moucha 2005
Patzmannsdorf	Austria	Austria	1	48.6333	16.2666	Asparn	Lenerz- de Wilde documentation
Peigerten	Austria	Austria	1	48.892778	15.269167	Hollabrunn	Lenerz- de Wilde documentation
Pfaffstätt	Austria	Austria	1	48.075	13.144444	Salzburg	Lenerz- de Wilde documentation
Pfedelbach-Untersteinbach	Germany	South Germany	1	49.141389	9.570278	Konstanz	Junk, Krause and Pernicka, 2001
Pilszcz	Poland	Poland	2	50	17.92	Wrocław	Lenerz- de Wilde documentation
Radostice	Czech Republic	Moravia	1	49.133638	16.47702	České Budějovice	Moucha 2005
Reut (Riet)	Germany	South Germany	1	48.311111	12.942778	Munich	Lenerz- de Wilde documentation
Riedern	Germany	South Germany	1	47.723333	11.3325	Munich	Lenerz- de Wilde documentation; Möslein 2008
Riesa	Germany	Middle Germany	2	51.308056	13.293889	Dresden	Lenerz- de Wilde documentation
Roth	Germany	South Germany	1	49.246111	11.091111	Munich	Lenerz- de Wilde documentation
Salching	Germany	South Germany	1	48.816667	12.566667	Nuremberg//Regensburg//Straubing	Lenerz- de Wilde documentation
Schabenberg (Pfaffenhofen an der Ilm)	Germany	South Germany	1	48.529722	11.506667	Munich	Lenerz- de Wilde documentation
Schleching	Germany	South Germany	1	47.72	12.396111	Munich	Lenerz- de Wilde documentation
Schleinitz (Leuben-Schleinitz)	Germany	Middle Germany	2	51.15	13.333333	Dresden	Lenerz- de Wilde documentation
Schrobenhausen-Freinhausen	Germany	South Germany	1	48.629167	11.431111	Schrobenhausen	Lenerz- de Wilde documentation
Senning	Austria	Austria	1	48.478333	16.241667	Vienna	Lenerz- de Wilde documentation
Sierndorf	Austria	Austria	1	48.428611	16.1675	Asparn//Vienna	Lenerz- de Wilde documentation
Skočice	Czech Republic	Bohemia	1	49.186196	14.104284	Prague//Písek//Prague ARÚ	Moucha 2005
Slavkov u Brna	Czech Republic	Moravia	1	49.153275	16.876504	Vienna//Brno	Lenerz- de Wilde documentation
Soběchleby	Czech Republic	Bohemia	1	49.478807	13.516111	Vienna	Moucha 2005
Soběnice	Czech Republic	Bohemia	1	50.569722	17.647355	Prague	Moucha 2005
Soběslav	Czech Republic	Bohemia	1	49.260006	14.718639	Tábor	Moucha 2005
St. Pölten - Spratzern	Austria	Austria	1	48.2	15.625	Vienna	Lenerz- de Wilde documentation
Stará Boleslav	Czech Republic	Bohemia	1	50.195879	14.674968	Prague	Moucha 2005
Staudach-Egerndach	Germany	South Germany	1	47.779	12.480	Munich	Lenerz- de Wilde 2002
Stehelčeves	Czech Republic	Bohemia	1	50.171725	14.190924	Prague	Moucha 2005
Stradonice	Czech Republic	Bohemia	1	50.374722	13.963056	Louny	Moucha 2005
Straubing	Germany	South Germany	1	48.883333	12.566667	Straubing	Lenerz- de Wilde documentation
Suché Vrbné	Czech Republic	Bohemia	1	48.971	14.5038	České Budějovice	Moucha 2005
Suchohrdly	Czech Republic	Moravia	1	48.866159	16.089019	Brno	Lenerz- de Wilde documentation
Temelín	Czech Republic	Bohemia	1	49.192916	14.348765	Prague//Týn nad Vltavou//Prague ARÚ	Moucha 2005
Thailing (Ebersberg)	Germany	South Germany	1	48.083333	11.966667	Munich	Lenerz- de Wilde documentation
Thale	Germany	Middle Germany	2	51.75	11.05	Halle	Lenerz- de Wilde documentation
Traisenmündung	Austria	Austria	1	48.369	15.844	Vienna	Lenerz- de Wilde documentation
Tulešice	Czech Republic	Moravia	1	49.038583	16.207139	Vienna	Lenerz- de Wilde documentation
Újezd	Czech Republic	Bohemia	1	49.234167	14.3575	Týn nad Vltavou	Moucha 2005
Unknown (Brno)	Czech Republic	Moravia	1	0	0	Brno	Lenerz- de Wilde documentation
Unknown (Linz)	Austria	Austria	1	0	0	Linz	Lenerz- de Wilde documentation
Unknown (Südbayern)	Germany	South Germany	1	0	0	Munich	Lenerz- de Wilde documentation
Unknown (Wien)	Austria	Austria	1	0	0	Vienna	Lenerz- de Wilde documentation
Unknown (Wien)	Czech Republic	Moravia	1	0	0	Vienna	Lenerz- de Wilde documentation
Unknown (Znojno)	Czech Republic	Moravia	1	0	0	Znojmo	Lenerz- de Wilde documentation
Unterradlberg	Austria	Austria	1	48.256	15.679	St. Pölten	Lenerz- de Wilde 2002
Unterrezbach	Austria	Austria	1	48.765167	16.006694	Vienna	Lenerz- de Wilde documentation
Unterwössen	Germany	South Germany	1	47.735	12.457	Private Property	Lenerz- de Wilde 2002
Uttenweiler	Germany	South Germany	1	48.148333	9.613056	Stuttgart	Lenerz- de Wilde documentation
Veselíčko	Czech Republic	Bohemia	1	49.38808	14.356798	Prague	Moucha 2005
Vitín	Czech Republic	Bohemia	1	49.089563	14.545888	České Budějovice	Lenerz- de Wilde documentation
Vlasatice	Czech Republic	Moravia	1	48.933778	16.484426	Brno	Lenerz- de Wilde documentation
Vodňany	Czech Republic	Bohemia	1	49.147976	14.175148	Vodňany	Moucha 2005
Všemyslice	Czech Republic	Bohemia	1	49.217039	14.35791	České Budějovice	Lenerz- de Wilde documentation
Waagtal	Austria	Austria	1	0	0	Vienna	Lenerz- de Wilde documentation
Waging am See	Germany	South Germany	1	47.9342	12.7355	Munich	Lenerz- de Wilde documentation
Wildendürnbach	Austria	Austria	1	48.75	16.533333	Asparn	Lenerz- de Wilde documentation
Wisselsing	Germany	South Germany	1	48.701032	12.9736	Munich	Lenerz- de Wilde documentation
Znojmo	Czech Republic	Moravia	1	48.855541	16.048796	Znojmo	Lenerz- de Wilde documentation

## Sheet: Hoards with axe blades
Hoard	Country	Province	Zone	Latitude	Longitude	Museum	Source
Börhingen-Rickelshausen	Germany	Baden-Württemberg	1	47.7479	8.92397	Hegau-Singen	Kienlin 2008
Bresinchen	Germany	Brandenburg	2	52	14.6858	Potsdam	Breddin 1969
Bühl im Ries	Germany	Bavaria	1	48.8346	10.657	Nördlingen	Abels 1972
Carsdorf (Pegau)	Germany	Saxony	2	51.1666	12.2547	Leipzig	Own measurements
Czarkow	Poland	Greater Poland	2	50.0159	18.9077	Bytom	Kusnierz 1998
Dederstedt	Germany	Saxony	2	51.5452	11.6889	Eisleben	Brunn 1959
Dermsdorf	Germany	Thuringia	2	51.2052	11.1996	Dermsdorf	Landesamt für Denkmalpflege und Archäologie Thueringen
Dobročkovice	Czech Republic	Central Bohemia	1	49.1628	17.1083	Brno	Own measurements
Dresden-Laubegast	Germany	Saxony	2	51.025	13.8379	Dresden	Coblenz 1951
Forchheim-Serlbach	Germany	Bavaria	1	49.7349	11.0963	Forchheim	Pászthory and Mayer 1998
Gams-Gasenzen	Switzerland	St. Gallen	1	47.2114	9.44887	St. Gallen	Abels 1972; Bill 1985
Grenchen	Switzerland	Solothurn	1	47.1928	73.9512	Bern	Abels 1972
Gröbers-Bennewitz	Germany	Saxony	2	51.3585	12.7107	Berlin	Museum Berlin
Habsheim	France	Alsace	1	47.7283	7.41678	Biberach	Abels 1972
Henfenfeld	Germany	Bavaria	1	49.4983	11.3888	Nürnberg	Pászthory and Mayer 1998
Hindelwangen	Germany	Baden-Württemberg	1	47.8605	9.00554	Hegau-Singen	Kienlin 2008
Hippersdorf	Austria	Lower Austria	1	48.421	15.9651	Wien	Mayer 1976
Ittelsburg	Germany	Bavaria	1	47871773	10270241	Memmingen	Pászthory and Mayer 1998
Jičíněves	Czech Republic	Hradec Králové	1	50.373	15.3363	Kopidlno	Moucha 2007
Kappeln	Germany	Schleswigh-Holstein	2	54.6594	9.9222	Schleswig	Endrigkeit 2010
Karmin II	Poland	Lower Silesia	2	51.5276	17.2704	Wroclaw	Kusnierz 1998
Karmin III	Poland	Lower Silesia	2	51.5276	17.2704	Wroclaw	Kusnierz 1998
Langquaid	Germany	Bavaria	1	48.8167	12.05	München	Own measurements
Linz a.d. Donau	Austria	Upper Asutria	1	48.3069	14.2858	Linz	Mayer 1976
Mahrersdorf	Austria	Lower Austria	1	48.3878	14.5297	Wien	Mayer 1977
Mengen	Germany	Baden-Württemberg	1	48.0521	9.33697	Stuttgart	Abels 1972; Stein 1979
Neukloster I	Germany	Lower Saxony	2	53.4784	9.64305	Hannover	Own measurements
Neyruz	Switzerland	Fribourg	1	46.6972	6.78772	Lausanne	Abels 1972
Niederosterwitz	Austria	Carinthia	1	46.7501	14.4342	Klagenfurt	Mayer 1976
Ostenfeld	Germany	Schleswigh-Holstein	2	54.4628	9.23412	Schleswig	Endrigkeit 2010
Paitzkofen	Germany	Bavaria	1	48.8095	12.7078	Landsut	Berger 1985; Pászthory and Mayer 1998
Pilszcz	Poland	Opole	2	49.9981	17.9177	Wroclaw	Szpunar 1987
Regensburg-Hochweg	Germany	Bavaria	1	49.0213	12.0717	Regensburg	Pászthory and Mayer 1998
Reinhardshofen	Germany	Bavaria	1	49.6262	10.6514	Ansbach	Pászthory and Mayer 1998
Reupelsdorf	Germany	Bavaria	1	49.8127	10.2922	Würzburg	Pászthory and Mayer 1998
Saarburg-Trassem	Germany	Rhineland-Palatinate	1	49.5776	6.52383	Trier	Stein 1979; Kibbert 1980
Saběnice	Czech Republic	Central Bohemia Region	1	50.4463	13.5876	Most	Blazek and Hansen 1997
Schönberg bei Niederwolz	Austria	Styria	1	47.1877	14.3507	Graz	Mayer 1977
Sennewald-Salez	Switzerland	Salez	1	47.2372	9.50095	Innsbruck	Abels 1972; Bill 1985, 1997
Sigriswil-Ringoldswil	Switzerland	Bern	1	46.7316	7.68515	Bern	Abels 1972
Smørumovre	Denmark	Zealand	3	55.7356	12.2729	Copenhagen	Johannsen 2015
Soběchleby	Czech Republic	Olomouc	1	49.4788	17.6474	Wien	Moucha 2007
Soběnice	Czech Republic	Ústecký	1	50.5704	14.2427	Prague	Moucha 2007
Stade-Campe	Germany	Lower Saxony	2	53.5917	9.47326	Stade	Laux 2000
Vaihingen a.d. Enz	Germany	Baden-Württemberg	1	48.9329	8.96104	Stuttgart	Abels 1972; Stein 1979
Waging am See	Germany	Bavaria	1	47.9342	12.7355	München	Own measurements
Zapfendorf	Germany	Bavaria	1	50.0175	10.9345	München	Pászthory and Mayer 1998

## Sheet: Museums
Museum	Full name	Country	Province
Ansbach	Markgrafenmuseum	Germany	Bavaria
Asparn	Landessammlung Niederösterreich (MAMUZ Asparn)	Austria	Lower Austria
Bad Reichenhall	Museum Bad Reichenhall	Germany	Bavaria
Bamberg	Historisches Museum	Germany	Bavaria
Bautzen	Stadtmuseum Bautzen	Germany	Saxony
Bayreuth	Städtisches Museum	Germany	Bavaria
Berlin	Museum für Vor- und Frühgeschichte. Staatliche Museen zu Berlin	Germany	Berlin
Berlin Ethn.	Ethnologisches Museum Berlin	Germany	Berlin
Bern	Bernisches Historisches Museum	Switzerland	Bern
Biberach	Museum Biberach	Germany	Baden-Württemberg
Brandenburg	Archäologisches Landesmuseum Brandenburg	Germany	Brandenburg
Bregenz	Vorarlberg Museum	Austria	Vorarlberg
British	British Museum London	United Kingdom	England
Brno	Moravské zemské muzeum Brno	Czech Republic	South Moravia
Bytom	Muzeum Bytom	Poland	Silesia
Čelákovice	Městské muzeum v Čelákovicích	Czech Republic	Central Bohemia
České Budějovice	Jihočeské muzeum v Českých Budějovicích	Czech Republic	South Bohemia
Chur	Rätisches Museum	Switzerland	Grisons
Coburg	Naturwissenschaftliches Museum der Coburger Landesstiftung	Germany	Bavaria
Copenhagen	Nationalmuseet Danmark	Denmark	Copenhagen
Deggendorf	Stadtmuseum Deggendorf	Germany	Bavaria
Dermsdorf	Thüringer Landesamt für Denkmalpflege und Archäologie	Germany	Thuringia
Dobrovice	Dobrovická muzea	Czech Republic	Central Bohemia
Dobruška	Vlastivědného muzea v Dobrušce	Czech Republic	Hradec Králové
Dresden	Landesmuseum für Vorgeschichte Dresden	Germany	Saxony
Eisleben	Regionalgeschichtliche Sammlungen der Lutherstadt Eisleben	Germany	Saxony
Forchheim	Pfalzmuseum	Germany	Bavaria
Forchheim 2	Archäologiemuseum Oberfranken	Germany	Bavaria
Freiburg	Museum für Ur und Frühgeschichte_x0002_	Germany	Baden-Württemberg
Głogów	Muzeum Archeologiczno-Historyczne w Głogowie	Poland	Lower Silesia
Görlitz	Kulturhistorisches Museum Görlitz	Germany	Saxony
Graz	Landesmuseum Graz	Austria	Styria
Greding	Archäologie Museum Greding	Germany	Bavaria
Halle	Landesmuseum für Vorgeschichte	Germany	Saxony-Anhalt
Hannover	Niedersächsiches Landesmuseum Hannover	Germany	Lower Saxony
Hannover KM	Kestner-Museum	Germany	Lower Austria
Hildesheim	Hildesheim Roemer-Pelizaeus-Museum	Germany	Lower Saxony
Hollabrunn	Museum 'Alte Hofmühle' Hollabrunn	Austria	Lower Austria
Innsbruck	Tiroler Landesmuseum Ferdinandeum	Austria	Tyrol
Jičín	Regionální muzeum a galerie v Jičíně	Czech Republic	Hradec Králové
Kalininigrad	former Prussia Museum in Königsberg	Russia	Kalininigrad
Karlsruhe	Badisches Landesmuseum Karlsruhe	Germany	Baden-Württemberg
Kladno	Sládečkovo vlastivědné muzeum v Kladně	Czech Republic	Central Bohemia
Klagenfurt	Landesmuseum Klagenfurt	Austria	Carinthia
Konstanz	Archäologisches Landesmuseum Baden-Württemberg (Konstanz)	Germany	Baden-Württemberg
Konstanz Ros.	Rosgartenmuseum, Konstanz	Germany	Baden-Württemberg
Kopidlno	Kopidlnského muzea	Czech Republic	Hradec Králové
Lahr	Stadtmuseum Lahr	Germany	Baden-Württemberg
Landshut	Stadt- und Kreismuseum Landshut	Germany	Bavaria
Lausanne	Cantonal Museum of Archeology and History	Switzerland	Vaud
Leipzig	Naturkundemuseum Leipzig	Germany	Saxony
Linz	Oberösterreichisches Landesmuseum Linz	Austria	Upper Asutria
Litoměřice	Oblastní muzeum v Litoměřicích	Czech Republic	Ústí nad Labem
Ljubljana	Narodni Muzej	Slowaky	Slowaky
Louny	Oblastní muzeum v Lounech	Czech Republic	Ústí nad Labem
Mainburg	Stadtmuseum Mainburg	Germany	Bavaria
Memmingen	Stadtmuseum Memmingen	Germany	Bavaria
Mladá Boleslav	Muzeum Mladoboleslavska	Czech Republic	Central Bohemia
Most	Regional Museum Most	Czech Republic	Central Bohemia
Munich	Prähistorische Staatssammlung	Germany	Bavaria
Neuchâtel	Laténium – Parc et Musée d’archéologie de Neuchâtel	Switzerland	Neuchâtel
Nördlingen	Stadtmuseum Nördlingen	Germany	Bavaria
Nuremberg	Naturhistorische Gesellschaft Nürnberg	Germany	Bavaria
Nuremberg GM	Germanisches Nationalmuseum	Germany	Bavaria
Pegau	Heimatmuseum Pegau	Germany	Saxony
Písek	Prácheňské muzeum v Písku	Czech Republic	South Bohemia
Potsdam	Museums für Ur- und Frühgeschichte Potsdam	Germany	Brandenburg
Poznań	Muzeum Archeologiczne w Poznaniu	Poland	Greater Poland
Prague	Narodni Muzeum Praha	Czech Republic	Prague
Prague 2	Muzeum Hlavního Města Prahy	Czech Republic	Prague
Prague ARÚ	Archeologický ústav AV ČR, Praha	Czech Republic	Prague
Regensburg	Historisches Museum Regensburg	Germany	Bavaria
Roudnice nad Labem	Podřipsko v Roudnici nad Labem	Czech Republic	Ústí nad Labem
Salzburg	Salzburg Museum	Switzerland	Salzburg
Schleswig	Archäologischen Landesmuseum in Schleswig	Germany	Schleswigh-Holstein
Schrobenhausen	Museum Pflegschloss Schrobenhausen	Germany	Bavaria
Singen	Archäologisches Hegau-Museum Singen	Germany	Baden-Württemberg
St. Gallen	Historisches und Volkenkunde Museum	Switzerland	St. Gallen
St. Pölten	Museum Niederösterreich (St. Pölten)	Austria	Lower Austria
Stade	Museen Stade	Germany	Lower Saxony
Straubing	Gäubodenmuseum Straubing	Germany	Bavaria
Stuttgart	Landesmuseum Württemberg (Stuttgart)_x0002_	Germany	Baden-Württemberg
Tábor	Husitské muzeum v Táboře	Czech Republic	South Bohemia
Trier	Rheinisches Landesmuseum Trier	Germany	Rhineland-Palatinate
Týn nad Vltavou	Městské muzeum Týn nad Vltavou	Czech Republic	South Bohemia
Vienna	Naturhistorisches Museum Wien	Austria	Vienna
Villach	Stadtmuseum Villach	Austria	Carinthia
Wroclaw	Muzeum Archeologiczne	Poland	Silesia
Würzburg	Mainfränkisches Museum	Germany	Bavaria
Znojmo	Jihomoravské muzeum ve Znojmě	Czech Republic	Znojmo
Zofingen	Naturhistorisches Museum	Switzerland	Aargau
Zürich	Schweizerisches Landesmuseum Zurich	Switzerland	Zürich
